# Supplementary material for: Defining the Estimated Core Genome of Bacterial Populations Using a Bayesian Decision Model
Source: PLoS Comput Biol. 2014 Aug 21;10(8):e1003788. doi: 10.1371/journal.pcbi.1003788 (PMC4140633; doi:10.1371/journal.pcbi.1003788)
Supplement: Datasets S1 — Metadata for all the genomes included in this study. (XLSX) [file pcbi.1003788.s001.xlsx]

## Sheet: S_pneumoniae
Datasets S1 (S. pneumoniae): Genomes included in the study dataset, with available metadata and genome sequence accession numbers.
BIGS id	Strain	Aliases	Serotype	Country	Year	Carriage or disease	Disease diagnosis	Source	penicillin	ST	CC	Accession number
7	2/2	pn2L	2	USA	1956				0.016	574	574	ERR025820
8	2/3		2	Denmark	1943				0.032	3744	490	ERR026715
27	7A/2	2040/37	7A	Denmark	1937				0.008	191	191	ERR025824
29	7B/2	Johnson	7B	USA	1952				0.023	7180	66	ERR025825
33	7F/2		7F	USA	1952				0.023	7210	218	ERR026172
34	7F/3		7F	Denmark	1962				0.016	191	191	ERR026176
35	7F/4		7F	Scotland	1986				0.023	7208	191	ERR026177
42	9A/1	Wilder	9A	USA	1962				0.012	312	156/162	ERR025826
43	9L/2		9L	USA	1952				0.023	5979	124	ERR026178
46	9N/2		9N	USA	1952				0.023	7205	None3983	ERR026179
50	9N/6		9N	Denmark	1960				0.016	71	66	ERR026180
52	9V/4	980/68	9V	Denmark	1968				0.008	123	113	ERR025827
53	9V/5		9V	Denmark	1991				0.016	162	156/162	ERR026181
54	9V/6		9V	Denmark	1994				0.016	162	156/162	ERR026182
58	10F/2	34355	10F	USA	1956				0.016	7186	490	ERR025828
61	11C/1	Eddy nr. 53	11C	USA	1957				0.023	7201	124	ERR025829
77	12F/2		12F	USA	1962				0.012	7194	Singleton10043	ERR026183
78	12F/3		12F	Denmark	1961				0.012	7228	4399	ERR026195
80	12F/5		12F	Denmark	1988				0.016	218	218	ERR026196
81	12F/6		12F	Denmark	1996				0.012	218	218	ERR026187
83	14/2	34359	14	USA	1952				0.016	124	124	ERR025830
84	14/3		14	Denmark	1939				0.012	875	1106	ERR026719
85	14/4		14	Denmark	1961				0.012	134	124	ERR026188
86	14/5		14	Denmark	1967				0.016	15	15	ERR026720
88	14/7		14	Denmark	1992				0.016	7198	124	ERR026721
89	14/8		14	Denmark	1976				0.75	7206	554	ERR026722
90	14/9		14	Denmark	1982				0.008	124	124	ERR026723
100	17F/1	Rose (am) vac.	17F	USA	1952				0.012	574	574	ERR025831
101	17F/2		17F	Denmark	1939				0.012	123	113	ERR026724
102	17F/3		17F	Denmark	1962				0.012	392	392	ERR026725
103	17F/4		17F	Denmark	1962				0.012	392	392	ERR026726
106	18B/2	1033/41 (da)	18B	Denmark	1941				0.012	4706	113	ERR026193
108	18C/2		18C	Denmark	1939				0.012	4706	113	ERR026186
109	18C/3		18C	Denmark	1968				0.008	7195	113	ERR026716
110	18F/1	Gethens (am) vac.	18F	USA	1961				0.023	7182	490	ERR026173
120	19F/5		19F	Denmark	1962				0.012	7229	4399	ERR026717
123	19F/8		19F	Denmark	1952				0.012	7229	4399	ERR026190
124	19F/10		19F	Denmark	1963				0.012	7230	Singleton10087	ERR026174
125	19F/11		19F	Denmark	1972				0.016	71	66	ERR026175
133	22A/2	3405/39(da)	22A	Denmark	1939				0.023	7181	490	ERR025822
136	23A/2	1196/45	23A	Denmark	1945				0.016	439	439	ERR025821
141	23F/4		23F	Denmark	1968				0.125	7184	Singleton7184	ERR026191
142	23F/5		23F	Germany	1979				0.012	439	439	ERR026718
144	23F/10	Dr. Melchior	23F	Denmark	1996				0.023	515	439	ERR026194
178	35C/2		35C	Denmark	1941				0.012	7196	113	ERR026192
179	35C/3	7765/43 (da)	35C	Denmark	1943				0.023	5989	113	ERR025823
216	ICE11		6B	Iceland	1998	disease	bacteremia	blood		490	490	ERR025270
217	ICE22		7F	Iceland	1993	disease	bacteremia	blood		191	191	ERR028709
218	ICE23		7F	Iceland	1993	disease	bacteremia	blood		218	218	ERR026202
219	ICE46		14	Iceland	2003	disease	bacteremia	blood		124	124	ERR028710
225	ICE594		14	Iceland	2005	disease	bacteremia	blood		124	124	ERR026200
226	ICE13		14	Iceland	1998	disease	bacteremia	blood		9	15	ERR026198
228	ICE50		14	Iceland	2003	disease	bacteremia	blood	1.5	13	15	ERR026204
229	Ala243	L2003-01243	14	USA	1998	carriage			1	13	15	ERR028708
232	Ala317	L2003-01317	14	USA	2001	disease	bacteremia	blood	0.75	13	15	ERR028715
234	Ala263	L2003-01263	14	USA	2002	carriage				124	124	ERR028712
236	Ala289	L2003-01289	14	USA	2002	disease	bacteremia	blood		124	124	ERR028713
237	Ala292	L2003-01292	14	USA	1998	disease	bacteremia	blood		124	124	ERR028714
240	USA2		18C	USA	1999	disease	bacteremia	blood	0.03	113	113	ERR028716
244	USA6		14	USA	1999	disease	bacteremia	blood	0.03	124	124	ERR025254
246	USA8		9N	USA	2001	disease	bacteremia	blood	0.03	8119	66	ERR025258
247	USA9	PATH#183	14	Brazil	1999	disease	bacteremia	blood	0.25	66	66	ERR025259
249	USA11	PATH#286	14	Brazil	2007	disease	meningitis	CSF	0.064	66	66	ERR025260
250	USA12	PATH#678	23F	Poland	2001	carriage		nasopharynx		66	66	ERR025261
251	USA13	PATH#688	19F	Germany	2005					66	66	ERR025262
254	USA16	PATH#224	7F	Brazil	2003	disease	bacteremia	blood		191	191	ERR028717
256	USA18		12F	USA	1999	disease	pneumonia	blood	0.03	218	218	ERR028718
258	USA20	PATH#129	7F	South Africa	1999	disease	bacteremia	blood		218	218	ERR025263
260	USA22		6C	USA	2005	disease	bacteremia	blood	0.5	490	490	ERR028719
261	Spain23F-1	ATCC 700669; SP264	23F	Spain	1984	disease			1	81	81	FM211187
262	Spain6B-2	ATCC 700670; GM17	6B	Spain	1988	disease	other	pus	0.5	90	90	ERR025264
263	Spain9V-3	ATCC 700671; TL7/1993	9V	France	1993	disease			1.5	156	156/162	ERR025265
264	Tennessee23F-4	ATCC 51916; CS111	23F	USA	1991	disease	meningitis	CSF	0.125	37	439	ERR025255
265	Spain14-5	ATCC 700902; MS22	14	Spain	1990	disease			1.5	18	18	ERR025256
266	Hungary19A-6	ATCC 700673; HUN663	19A	Hungary	1989				1	268	176	CP000936
268	S.Africa6B-8	50803; ATCC 700675	6B	South Africa	1990	disease	bacteremia	blood	0.19	185	385	ERR163138
269	England14-9	ATCC 700676; PN93/872/B	14	UK	1994	disease			0.016	9	15	ERR025257
270	CSR14-10	87-029055; ATCC 700677	14	Czech Slovak Republic	1987	disease			8	20	15	ERR025267
272	Finland6B-12	43362 Fi10; ATCC 700903	6B	Finland	1987	disease			4	238	90	ERR025271
273	S.Africa19A-13	51702; ATCC 700904	19A	South Africa	1988	disease		ear swab	1.5	41	None41	ERR028711
274	Taiwan19F-14	ATCC 700905; TW31	19F	Taiwan	1997	disease	meningitis	CSF	2	236	236/271/320	ERR026201
275	Taiwan23F-15	ATCC 700906; TW17	23F	Taiwan	1997	disease	bacteremia	blood	0.75	242	242	ERR025272
277	Maryland6B-17	4752-98; ATCC BAA-342	6B	USA	1997	disease			1.5	384	385	ERR025273
278	Tennessee14-18	4954-98; ATCC BAA-340	14	USA	1997	disease			4	67	66	ERR025274
282	Greece6B-22	ATCC BAA-658; GR890	6B	Greece	1996	carriage		nasopharynx	0.023	273	90	ERR025275
294	Denmark12F-34	ATCC BAA-1660; M293-12F	12F	Canada	1995	disease	meningitis	CSF	0.016	218	218	ERR025276
295	Netherlands14-35	ATCC BAA-1661; M269-14	14	Netherlands	1980	disease	meningitis	CSF	0.016	124	124	ERR025277
296	Netherlands18C-36	ATCC BAA-1662; M241-18C	18C	Netherlands	1980	disease	meningitis	CSF	0.023	113	113	ERR025278
299	Netherlands7F-39	ATCC BAA-1665; M248-7F	7F	Netherlands	1984	disease	meningitis	CSF	0.012	191	191	ERR025268
304	CDC0288-04		12F	USA	2004	disease	bacteremia	blood		220	218	PRJNA54893
305	CDC1087-00		7F	USA	1999	disease	meningitis	CSF		191	191	PRJNA54923
306	CDC1873-00		6A	USA	1999	disease	bacteremia	blood	4	376	2090	PRJNA54921
307	CDC3059-06		19A	USA	2005	disease	bacteremia	blood	0.12	199	199	PRJNA54891
308	CGSP14		14	Taiwan	2005	disease	pneumonia		2	15	15	CP001033
309	D39	NCTC 7466	2	USA	1916	disease				595	None128	CP000410
310	SA84	35897; SA3	14	South Africa					0.06	5174	15	ERR163139
311	MLV-016		11A							62	62	PRJNA54929
312	R6		NT	Laboratory	1964					595	None128	AE007317
313	670		6B	Spain	1988					90	90	PRJNA52533
314	SA27	8256; SA4	14	South Africa					0.023	5174	15	ERR163140
315	SPnINV104B		1	UK	1998	disease	pneumonia	blood		227	306	PRJNA162039
316	SPnINV200		14	UK	1995	disease	bacteremia	blood		9	15	PRJNA162035
317	SPnOXC141		3	UK	2001	carriage		nasopharynx		180	180	PRJNA162037
318	TIGR4	JNR7/87; KNR.7/87; N4	4	Norway	1991	disease	bacteremia	blood		205	205	AE005672
319	P1031		1	China	2002	disease	meningitis			303	217	CP000920
320	70585		5	Bangladesh						289	289	CP000918
321	JJA		14	Brazil	1995	disease	meningitis	CSF		66	66	CP000919
966	USA23	89FL23F	23F	USA	1989	disease		sputum	2	33	439	ERR163228
967	USA24	89SA23F	23F	South Africa	1989				4	81	81	ERR163141
969	USA26	85PA23F	23F	USA	1985	disease		sputum	4	81	81	ERR163221
970	USA27	85NY23F	23F	USA	1985				0.03	1906	439	ERR163230
971	USA28	88FL23F	23F	USA	1988			nasopharynx	2	81	81	ERR163222
974	USA31	83MI23F	23F	USA	1983				1	7256	Singleton7256	ERR163232
976	USA33	81CO6B	6B	USA	1981	disease	meningitis	CSF	1	238	90	ERR163227
977	USA34	85NY19A	19A	USA	1985			nasopharynx	8	41	None41	ERR163231
978	USA35	89NY23F	23F	USA	1989	disease		other	4	81	81	ERR163223
982	USA39	90MO6B	6B	USA	1990	disease	bacteremia	blood	2	90	90	ERR163226
985	USA42	84PA23F	23F	USA	1984				4	81	81	ERR163224
990	USA47	85UT23F	23F	USA	1985	disease	meningitis	CSF	2	81	81	ERR163225
991	USA48	91GA23F	23F	USA	1991	disease		other	1	37	439	ERR163229
993	SA1	203A	19A	South Africa	1978	carriage		nasopharynx	4	41	None41	ERR163142
994	SA2	223 (19A)	19A	South Africa	1978	carriage		nasopharynx	2	41	None41	ERR163143
995	SA3	381	19A	South Africa	1978	carriage		nasopharynx	4	41	None41	ERR163144
996	SA4	107	19A	South Africa	1978	carriage		nasopharynx	4	41	None41	ERR163145
997	SA5	61857	19A	South Africa	1978	carriage		nasopharynx	2	41	None41	ERR163146
998	SA6	61783	19A	South Africa	1978	carriage		nasopharynx	2	41	None41	ERR163147
999	SA7	145	19A	South Africa	1978	carriage		nasopharynx	4	1605	None41	ERR163148
1000	SA8	209	19A	South Africa	1978	carriage		nasopharynx	4	1605	None41	ERR163149
1001	SA9	205	19A	South Africa	1978	carriage		nasopharynx	4	1605	None41	ERR163150
1002	SA10	DURBANT	19A	South Africa	1977	disease	bacteremia		4	1656	None68	ERR163151
1003	SA11	60292	6A	South Africa	1978	carriage		nasopharynx	4	1094	1094	ERR163152
1004	SA12	994	6A	South Africa	1978	carriage		nasopharynx	4	1094	1094	ERR163153
1005	SA13	60293	6A	South Africa	1978	carriage		nasopharynx	2	1094	1094	ERR163154
1006	SA14	62272	6A	South Africa	1978	carriage		nasopharynx	4	1094	1094	ERR163155
1007	SA15	532	6A	South Africa	1978	carriage		nasopharynx	2	1094	1094	ERR163156
1008	SA16	61155	6A	South Africa	1978	carriage		nasopharynx	4	1094	1094	ERR163157
1009	SA17	13811	6A	South Africa	1978	carriage		nasopharynx	4	1094	1094	ERR163158
1010	SA18	223 (6A)	6A	South Africa	1978	carriage		nasopharynx	2	1094	1094	ERR163159
1011	SA19	61153	6A	South Africa	1978	carriage		nasopharynx	4	1094	1094	ERR163160
1012	SA20	61154	6A	South Africa	1978	carriage		nasopharynx	4	1094	1094	ERR163161
1013	SA21	135	6A	South Africa	1978	carriage		nasopharynx	4	1607	1094	ERR163162
1014	SA22	61855	14	South Africa	1978	carriage		nasopharynx	0.25	124	124	ERR163163
1015	SA23	61370	19A	South Africa	1978	carriage		nasopharynx	0.5	172	176	ERR163164
1016	SA24	A922	19A	South Africa	1978	carriage		nasopharynx	0.25	1608	None1608	ERR163165
1017	SA25	A910	19A	South Africa	1978	carriage		nasopharynx	0.5	1608	None1608	ERR163166
1018	SA26	A1002	19A	South Africa	1978	carriage		nasopharynx	0.5	1610	None1608	ERR163167
1028	SA28	272; SA5	14	South Africa		disease	meningitis	CSF	0.012	5174	15	ERR163168
1031	SA31	2039; SA8	6A	South Africa		disease	meningitis	CSF	2	1094	1094	ERR163169
1032	SA32	10760; SA9	6A	South Africa		disease	meningitis	CSF	4	1094	1094	ERR163170
1034	SA34	11405; SA11	29	South Africa	1988	disease			0.015	5178	None5177	ERR163171
1035	SA35	45607; SA12	29	South Africa	1987	disease	meningitis	CSF	0.03	5178	None5177	ERR163172
1036	SA36	60814; SA13	29	South Africa	1987	disease	meningitis	CSF	0.25	5178	None5177	ERR163173
1037	SA37	56828; SA14	19F	South Africa	1987	disease	meningitis	CSF	0.12	5179	Singleton5179	ERR163174
1038	SA38	60785; SA18	6A	South Africa	1987	disease	meningitis	CSF	16	1094	1094	ERR163175
1039	SA39	63509; SA19	19A	South Africa	1987	disease	meningitis	CSF	0.75	41	None41	ERR163176
1041	SA41	215; SA21	6B	South Africa	<1990	disease			0.5	1094	1094	ERR163178
1042	SA42	613; SA22	19F	South Africa	<1990	disease			0.008	763	236/271/320	ERR163179
1043	SA43	20463; SA23	19A	South Africa	<1990	disease			0.25	41	None41	ERR163180
1044	SA44	39062; SA24	6A	South Africa	<1990	disease			2	1094	1094	ERR163181
1045	SA45	60292; SA25	6A	South Africa	<1990	disease			4	1094	1094	ERR163182
1056	PN1	Pn12; n53139	6A	Papua New Guinea	1972	disease			1	7151	176	ERR163219
1057	PN2	B232C2; P1	4	Papua New Guinea	1969	disease			1	7152	Singleton7152	ERR163220
1058	SA47	97-1	19A	South Africa	1979	disease	bacteremia	blood	2	1605	None41	ERR163183
1059	SA48	48	19A	South Africa	1979	disease	bacteremia	blood	4	1656	None68	ERR163184
1060	SA49	48-2	19A	South Africa	1982				0.023	7255	Singleton7255	ERR163185
1061	SA51	46878	6B	South Africa	1989	disease	meningitis	CSF	0.125	185	385	ERR163186
1062	SA52	13979	6B	South Africa	1984	disease	pneumonia	sputum	0.25	2421	2421	ERR163187
1063	SA53	N383	11A	South Africa	1983	disease	bacteremia	blood	0.25	7247	1010	ERR163188
1064	SA54	136664	6B	South Africa	1983				0.125	7084	7084	ERR163189
1065	SA55	31664	19A	South Africa	1983				0.25	75	Singleton75	ERR163190
1066	SA56	6415	6B	South Africa	1984	disease	meningitis	CSF	2	1094	1094	ERR163191
1067	SA57	108551	6B	South Africa	1984				0.125	185	385	ERR163192
1068	SA58	19931	19F	South Africa	1986				0.125	7249	Singleton7249	ERR163193
1069	SA59	3630	6A	South Africa	1985	disease	bacteremia	blood	0.25	7251	1094	ERR163194
1070	SA60	511	19A	South Africa	1985	disease	bacteremia	blood	0.125	172	176	ERR163195
1071	SA61	97	19A	South Africa	1985	disease	bacteremia	blood	0.125	5183	176	ERR163196
1072	SA62	28649	6B	South Africa	1985				1	1094	1094	ERR163197
1073	SA63	93343	14	South Africa	1985				0.125	124	124	ERR163198
1074	SA64	6482	19F	South Africa	1985	disease	bacteremia	blood	0.125	7254	Singleton7254	ERR163199
1076	SA66	6428	6B	South Africa	1985	disease	bacteremia	blood	0.125	185	385	ERR163201
1077	SA67	34023	6B	South Africa	1985				0.125	7250	Singleton7250	ERR163202
1078	SA68	3904	6A	South Africa	1985				0.5	7257	1094	ERR163203
1079	SA69	34142	19A	South Africa	1985				0.5	7248	Singleton7248	ERR163204
1080	SA70	6130	19A	South Africa	1985	disease	meningitis	CSF	0.25	5183	176	ERR163205
1081	SA71	34581	23F	South Africa	1989				0.25	6215	81	ERR163206
1082	SA72	34139	6A	South Africa	1988				1	1094	1094	ERR163207
1083	SA73	48628	19A	South Africa	1988				4	41	None41	ERR163208
1084	SA74	13897	23F	South Africa	1988				1	6215	81	ERR163209
1085	SA75	13619	23F	South Africa	1987				0.5	6215	81	ERR163210
1086	SA76	95103	14	South Africa	1988				0.125	7246	Singleton7246	ERR163211
1087	SA77	26940	23F	South Africa	1987				1	6215	81	ERR163212
1088	SA78	47590	14	South Africa	1989	disease	bacteremia	blood	0.25	7253	Singleton7253	ERR163213
1089	SA79	49171	19A	South Africa	1989	disease	bacteremia	blood	0.125	172	176	ERR163214
1090	SA80	22453	23F	South Africa	1989				0.5	81	81	ERR163215
1091	SA81	23099	23F	South Africa	1989				0.5	6215	81	ERR163216
1092	SA82	47085	14	South Africa	1989	disease	pneumonia	other	0.25		124	ERR163217
1093	SA83	46518	6B	South Africa	1989	disease	bacteremia	blood	0.047	53	62	ERR163218
1094	TCH8431		19A							320	236/271/320	PRJNA49735
1095	BS397		NT	USA						13	15	PRJNA51551
1096	BS455		NT	USA						2011	15	PRJNA51543
1097	BS457		NT	USA						13	15	PRJNA51553
1098	BS458		14	USA						13	15	PRJNA51555
1099	CCRI1974		14	Canada						124	124	PRJNA55563
1101	SP11-BS70		11	USA						62	62	PRJNA54499
1102	SP14-BS292		14	USA						13	15	PRJNA51549
1103	SP14-BS69		14	USA						124	124	PRJNA54501
1104	SP18-BS74		6	USA						6214	146	PRJNA54503
1105	SP19-BS75		19F	USA						485	425	PRJNA54505
1106	SP23-BS72		23F	USA						37	439	PRJNA54507
1107	SP3-BS71		3	USA						180	180	PRJNA54493
1108	SP6-BS73		6A	USA						460	460	PRJNA54495
1109	SP9-BS68		9V	USA						1269	156/162	PRJNA54497
1110	Sp03-4156		3	Netherlands		carriage				180	180	PRJNA197185
1111	Sp03-4183		3	Netherlands		carriage				180	180	PRJNA197186
1112	Sp99_4038		3	UK		disease				180	180	PRJNA197187
1113	Sp99_4039		3	UK		disease				180	180	PRJNA197188
1114	Sp03_2672		1	UK		disease				306	306	PRJNA197189
1115	Sp03-3038		1	UK		disease				306	306	PRJNA197190
1116	AP200		11A	Italy	2003	disease				62	62	PRJNA52453
1117	G54		19F	Italy		disease				63	63	CP001015
1118	Canada MDR_19A		19A	Canada						320	236/271/320	PRJNA42621
1119	Canada MDR_19F		19F	Canada						320	236/271/320	PRJNA42623
1120	GA04375		19F							236	236/271/320	PRJNA179733
1121	GA07228		3	USA	1997					180	180	PRJNA179975
1122	GA07643		4	USA	1998					695	247	PRJNA179934
1123	GA08780		9V	USA	1997					156	156/162	PRJNA179976
1124	GA11184		19F	USA	1999					649	199	PRJNA179909
1125	GA11304		6B/D	USA	1999					90	90	PRJNA179935
1126	GA11426		19A	USA	1999					1936	199	PRJNA179936
1127	GA11663		19F	USA	1999					81	81	PRJNA179937
1128	GA13338		14	USA	1999					13	15	PRJNA179938
1129	GA13455		19F	USA	1999					651	236/271/320	PRJNA179939
1130	GA13494		14	USA	1999					656	124	PRJNA179940
1131	GA13637		18C	USA	1999					3060	113	PRJNA179941
1132	GA13856		33F	USA	1999					636	100	PRJNA179942
1133	GA14798		19F	USA	2000					3039	236/271/320	PRJNA179943
1134	GA16121		19F	USA	2000					1461	236/271/320	PRJNA179944
1135	GA16242		6B/D	USA	2001					1536	1536	PRJNA179945
1136	GA16531		6B/D	USA	2001					146	146	PRJNA179919
1137	GA16833		19F	USA	2002						236/271/320	PRJNA179946
1138	GA17227		23F	USA	2000					242	242	PRJNA179947
1139	GA17371		19F	USA	2000					8014	236/271/320	PRJNA179948
1140	GA17328		6A	USA	2000					376	2090	PRJNA179949
1141	GA17570		9V							156	156/162	PRJNA179786
1142	GA17971		6A	USA	2001					1175	Singleton1175	PRJNA179950
1143	GA18523		19F	USA	2001					2476	236/271/320	PRJNA179929
1144	GA19077		6A	USA	2002					1296	2090	PRJNA179951
1145	GA19451		19F	USA	2003					271	236/271/320	PRJNA179952
1146	GA19690		3	USA	2004					180	180	PRJNA179977
1147	GA41277		19A	USA	2004					199	199	PRJNA179953
1148	GA41301		23F							242	242	PRJNA179788
1149	GA41317		33A/F							2705	100	PRJNA179792
1150	GA41410		19A	USA	2004					1339	2090	PRJNA179924
1151	GA41437		6A	USA	2004					376	2090	PRJNA179954
1152	GA41538		6B/D	USA	2004					384	384	PRJNA179926
1153	GA41565		19A	USA	2004					81	81	PRJNA179955
1154	GA41688		14	USA	2004					13	15	PRJNA179956
1155	GA43265		19A	USA	2005					2584	199	PRJNA179916
1156	GA43380		19A	USA	2005					2348	Singleton2348	PRJNA179957
1157	GA44194		19A	USA	2005					2543	63	PRJNA179930
1158	GA44288		19A	USA	2005					320	236/271/320	PRJNA179913
1159	GA44378		23F	USA	2005					81	81	PRJNA179931
1160	GA44452		19A	USA	2005					2541	Singleton2541	PRJNA179917
1161	GA44500		19A	USA	2005					2269	199	PRJNA179923
1162	GA44511		19A	USA	2005					4464	156/162	PRJNA179932
1163	GA47033		6A/C	USA	2005					4150	1379	PRJNA179915
1164	GA47281		19F	USA	2006					3039	236/271/320	PRJNA179914
1165	GA47283		7F	USA	2006					191	191	PRJNA179958
1166	GA47360		19A	USA	2006					695	247	PRJNA179959
1167	GA47368		19A							1339	2090	PRJNA179791
1168	GA47373		19F	USA	2006					654	96	PRJNA179960
1169	GA47388		19A	USA	2006					4026	156/162	PRJNA179961
1170	GA47502		19A	USA	2006					1374	None1374	PRJNA179962
1171	GA47688		19A	USA	2006					320	236/271/320	PRJNA179910
1172	GA47751		19A	USA	2006					2268	2090	PRJNA179963
1173	GA47778		19A	USA	2006					320	236/271/320	PRJNA179970
1174	GA47976		19F	USA	2006					43	43	PRJNA179964
1175	GA49138		19F	USA	2006					651	236/271/320	PRJNA179790
1176	GA49447		19A	USA	2006					4176	Singleton4176	PRJNA179965
1177	GA52306		6A/C	USA	2007					3676	1379	PRJNA179918
1178	GA54644		19A	USA	2008					156	156/162	PRJNA179925
1179	GA47439		7F	USA						1176	218	PRJNA179966
1180	GA47901		1							304	304	PRJNA179967
1181	6735-05		19A	USA	2005					2344	199	PRJNA179912
1182	6901-05		19A	USA	2005					2381	199	PRJNA179920
1183	4027-06		19A	USA	2005					2344	199	PRJNA179911
1184	6963-05		19A	USA	2005					2392	199	PRJNA179928
1185	5787-06		19A	USA	2005					2542	199	PRJNA179927
1186	5185-06		19A	USA	2005					2393	236/271/320	PRJNA179971
1187	7286-06		19A	USA	2005					2514	236/271/320	PRJNA179921
1188	3063-00		19F	USA	1999					652	236/271/320	PRJNA179973
1189	EU-NP01		19A			carriage				695	247	PRJNA179974
1190	NP112		6B/D	USA		carriage				1536	1536	PRJNA179972
1191	NP070		23F	USA		carriage				37	439	PRJNA179922
1192	NP170		23F	USA		carriage				81	81	PRJNA179933
1193	NP127		6A	USA		carriage				376	2090	PRJNA179969
1194	Sp07-2838		3	Bolivia		carriage				180	180	PRJNA190578
1195	Sp02-1198		3			disease				180	180	PRJNA190577
1196	A45		3	UK		disease				6934	Singleton6934	PRJNA174986
1197	P1041		1	Ghana		disease				303	217
1198	NCTC7465		1	USA		disease				615	2296
1199	Sp06-1370		1			disease				306	306	PRJNA190579
1201	GA17545		6B/D							1536	1536	PRJNA179785
1203	PT8114		6C	USA	2006					1390	1390	PRJNA190233
1204	07AR0125		6C	USA	2006					1292	1379	PRJNA190230
1205	BR1064		6C	USA	2006					1692	395	PRJNA190231
1206	ND6012		6C	USA	2006					1692	395	PRJNA190232
1210	SB33	ERS004767	23F	Vietnam	1997	disease			1	81	81	ERS004767
1211	HK P1	ERS004773	23F	China	2000	carriage			2	81	81	ERS004773
1212	SI M1	ERS004784	23F	Singapore	2000	carriage			4	81	81	ERS004784
1213	Kor 136	ERS004799	23F	Korea	1998	carriage			2	81	81	ERS004799
1214	412	ERS004814	23F	Croatia	2001	carriage				81	81	ERS004814
1215	1788	ERS004816	19A	USA	2005	disease			4	2346	81	ERS004816
1216	2231	ERS004821	23F	USA	1998	disease			4	81	81	ERS004821
1217	2682	ERS004825	19A	USA	2006	disease			4	6220	81	ERS004825
1218	BS1	ERS004833	23F	Turkey	2005					81	81	ERS004833
1219	G104	ERS004835	23F	Turkey	2005					6219	81	ERS004835
1220	S-030	ERS004844	15B/C	China	2006					83	81	ERS004844
1221	SA4(Croucher)	ERS005189	23F	South Africa	2001	carriage			1	6216	81	ERS005189
1222	SA7(Croucher)	ERS005192	23F	South Africa	2002	carriage			1	6216	81	ERS005192
1223	SA17(Croucher)	ERS005201	23F	South Africa	2003	disease			1	6216	81	ERS005201
1224	SA27(Croucher)	ERS005209	23F	South Africa	2003	disease			1	6216	81	ERS005209
1225	SA61(Croucher)	ERS005228	23F	South Africa	2005	disease			1	2395	81	ERS005228
1226	SA78(Croucher)	ERS005236	23F	South Africa	2006	disease			1	6218	81	ERS005236
1227	SA142(Croucher)	ERS005256	23F	South Africa	1990	carriage			2	81	81	ERS005256
1228	SA151(Croucher)	ERS005268	23F	South Africa	1989	carriage			2	6215	81	ERS005268
1229	2859	ERS005273	23F	Germany	1992	disease			0.5	81	81	ERS005273
1230	8454	ERS005283	23F	Portugal	2002	disease			1	81	81	ERS005283
1231	23782	ERS005323	23F	Russia	2003				2	81	81	ERS005323
1232	23809	ERS005331	23F	Russia	2005	disease			4	81	81	ERS005331
1233	BM4200	ERS005337	23F	France	1978					1010	1010	ERS005337
1234	cdc01		4	USA	1999	disease	bacteremia	blood		695	247
1235	SA5(Croucher)	ERS005193	23F	South Africa	2001				0.5	6217	81	ERS005193
1236	cdc02		19A	USA	1999	disease	bacteremia	blood		199	199
1237	cdc13		19A	USA	2003	disease	bacteremia	blood		695	247
8291	ST556		19F	USA						1392	236/271/320	PRJNA162191

## Sheet: C_jejuni
Datasets S1 (C. jejuni): Genomes included in the study dataset, with available metadata and genome sequence accession numbers.
BIGS id	Strain	Aliases	Country	Year	Disease	Source	ST	CC	Accession number
5861	OXC4	Hn_4	UK	2003	gastroenteritis	human stool	104	ST-21 complex
5887	OXC30	Hn_30	UK	2003	gastroenteritis	human stool	50	ST-21 complex
5896	OXC39	Hn_39	UK	2003	gastroenteritis	human stool	53	ST-21 complex
5980	OXC123	Hn_123	UK	2003	gastroenteritis	human stool	262	ST-21 complex
5986	OXC129	Hn_129	UK	2003	gastroenteritis	human stool	19	ST-21 complex
10935	OXC6544	ERR108308; SC_RUN_7213_3#1	UK	2011	gastroenteritis	human stool	1911		ERR108308
12880	OXC6545	ERR108309; SC_RUN_7213_3#2	UK	2011	gastroenteritis	human stool	658	ST-658 complex	ERR108309
12881	OXC6546	ERR108310; SC_RUN_7213_3#3	UK	2011	gastroenteritis	human stool	449		ERR108310
12882	OXC6547	ERR108311; SC_RUN_7213_3#4	UK	2011	gastroenteritis	human stool	48	ST-48 complex	ERR108311
12883	OXC6548	ERR108312; SC_RUN_7213_3#5	UK	2011	gastroenteritis	human stool	19	ST-21 complex	ERR108312
12884	OXC6549	ERR108313; SC_RUN_7213_3#6	UK	2011	gastroenteritis	human stool	48	ST-48 complex	ERR108313
12885	OXC6550	ERR108314; SC_RUN_7213_3#7	UK	2011	gastroenteritis	human stool	464	ST-464 complex	ERR108314
12887	OXC6552	ERR108316; SC_RUN_7213_3#9	UK	2011	gastroenteritis	human stool	3769	ST-21 complex	ERR108316
12888	OXC6553	ERR108317; SC_RUN_7213_3#10	UK	2011	gastroenteritis	human stool	273	ST-206 complex	ERR108317
12889	OXC6554	ERR108318; SC_RUN_7213_3#11	UK	2011	gastroenteritis	human stool	464	ST-464 complex	ERR108318
12890	OXC6555	ERR108319; SC_RUN_7213_3#12	UK	2011	gastroenteritis	human stool	464	ST-464 complex	ERR108319
12891	OXC6556	ERR108320; SC_RUN_7213_3#13	UK	2011	gastroenteritis	human stool	4811		ERR108320
12892	OXC6557	ERR108321; SC_RUN_7213_3#14	UK	2011	gastroenteritis	human stool	5756		ERR108321
12893	OXC6558	ERR108322; SC_RUN_7213_3#15	UK	2011	gastroenteritis	human stool	53	ST-21 complex	ERR108322
12895	OXC6560	ERR108324; SC_RUN_7213_3#17	UK	2011	gastroenteritis	human stool	904	ST-607 complex	ERR108324
12896	OXC6561	ERR108325; SC_RUN_7213_3#18	UK	2011	gastroenteritis	human stool	132	ST-508 complex	ERR108325
12897	OXC6562	ERR108326; SC_RUN_7213_3#19	UK	2011	gastroenteritis	human stool	21	ST-21 complex	ERR108326
12898	OXC6563	ERR108327; SC_RUN_7213_3#20	UK	2011	gastroenteritis	human stool	21	ST-21 complex	ERR108327
12899	OXC6564	ERR108328; SC_RUN_7213_3#21	UK	2011	gastroenteritis	human stool	21	ST-21 complex	ERR108328
12900	OXC6565	ERR108329; SC_RUN_7213_3#22	UK	2011	gastroenteritis	human stool	50	ST-21 complex	ERR108329
12901	OXC6566	ERR108330; SC_RUN_7213_3#23	UK	2011	gastroenteritis	human stool	5	ST-353 complex	ERR108330
12902	OXC6567	ERR108331; SC_RUN_7213_3#24	UK	2011	gastroenteritis	human stool	354	ST-354 complex	ERR108331
12904	OXC6569	ERR108333; SC_RUN_7213_3#26	UK	2011	gastroenteritis	human stool	5597		ERR108333
12905	OXC6570	ERR108334; SC_RUN_7213_3#27	UK	2011	gastroenteritis	human stool	61	ST-61 complex	ERR108334
12906	OXC6571	ERR108335; SC_RUN_7213_3#28	UK	2011	gastroenteritis	human stool	50	ST-21 complex	ERR108335
12907	OXC6572	ERR108336; SC_RUN_7213_3#29	UK	2011	gastroenteritis	human stool	464	ST-464 complex	ERR108336
12908	OXC6573	ERR108337; SC_RUN_7213_3#30	UK	2011	gastroenteritis	human stool	21	ST-21 complex	ERR108337
12909	OXC6574	ERR108338; SC_RUN_7213_3#31	UK	2011	gastroenteritis	human stool	574	ST-574 complex	ERR108338
12910	OXC6575	ERR108339; SC_RUN_7213_3#32	UK	2011	gastroenteritis	human stool	5	ST-353 complex	ERR108339
12913	OXC6578	ERR108342; SC_RUN_7213_3#35	UK	2011	gastroenteritis	human stool	312	ST-658 complex	ERR108342
12916	OXC6579	ERR108343; SC_RUN_7213_3#36	UK	2011	gastroenteritis	human stool	61	ST-61 complex	ERR108343
12917	OXC6580	ERR108344; SC_RUN_7213_3#37	UK	2011	gastroenteritis	human stool	572	ST-206 complex	ERR108344
12918	OXC6581	ERR108345; SC_RUN_7213_3#38	UK	2011	gastroenteritis	human stool	464	ST-464 complex	ERR108345
12919	OXC6582	ERR108346; SC_RUN_7213_3#39	UK	2011	gastroenteritis	human stool	2030	ST-257 complex	ERR108346
12920	OXC6583	ERR108347; SC_RUN_7213_3#40	UK	2011	gastroenteritis	human stool	257	ST-257 complex	ERR108347
12921	OXC6584	ERR108348; SC_RUN_7213_3#41	UK	2011	gastroenteritis	human stool	5758	ST-353 complex	ERR108348
12922	OXC6585	ERR108349; SC_RUN_7213_3#42	UK	2011	gastroenteritis	human stool	5	ST-353 complex	ERR108349
12923	OXC6586	ERR108350; SC_RUN_7213_3#43	UK	2011	gastroenteritis	human stool	400	ST-353 complex	ERR108350
12925	OXC6588	ERR108352; SC_RUN_7213_3#45	UK	2011	gastroenteritis	human stool	5	ST-353 complex	ERR108352
12926	OXC6589	ERR108353; SC_RUN_7213_3#46	UK	2011	gastroenteritis	human stool	61	ST-61 complex	ERR108353
13782	OXC1211		UK	2005	gastroenteritis	human stool	661	ST-661 complex
14042	OXC1550		UK	2006	gastroenteritis	human stool	661	ST-661 complex
15545	OXC3817		UK	2008	gastroenteritis	human stool	262	ST-21 complex
15723	OXC4075		UK	2009	gastroenteritis	human stool	104	ST-21 complex
15841	OXC4249		UK	2009	gastroenteritis	human stool	50	ST-21 complex
16028	OXC4503		UK	2009	gastroenteritis	human stool	19	ST-21 complex
16048	OXC6250	ERR083867; SC_RUN_7038_3#1	UK	2011	gastroenteritis	human stool	257	ST-257 complex	ERR083867
16049	OXC6251	ERR083868; SC_RUN_7038_3#2	UK	2011	gastroenteritis	human stool	21	ST-21 complex	ERR083868
16050	OXC6252	ERR083869; SC_RUN_7038_3#3	UK	2011	gastroenteritis	human stool	572	ST-206 complex	ERR083869
16052	OXC6254	ERR083871; SC_RUN_7038_3#5	UK	2011	gastroenteritis	human stool	257	ST-257 complex	ERR083871
16053	OXC6256	ERR083873; SC_RUN_7038_3#7	UK	2011	gastroenteritis	human stool	2274		ERR083873
16054	OXC6257	ERR083874; SC_RUN_7038_3#8	UK	2011	gastroenteritis	human stool	21	ST-21 complex	ERR083874
16056	OXC6259	ERR083876; SC_RUN_7038_3#10	UK	2011	gastroenteritis	human stool	45	ST-45 complex	ERR083876
16057	OXC6260	ERR083877; SC_RUN_7038_3#11	UK	2011	gastroenteritis	human stool	5	ST-353 complex	ERR083877
16058	OXC6261	ERR083878; SC_RUN_7038_3#12	UK	2011	gastroenteritis	human stool	5717	ST-1034 complex	ERR083878
16059	OXC6262	ERR083879; SC_RUN_7038_3#13	UK	2011	gastroenteritis	human stool	904	ST-607 complex	ERR083879
16061	OXC6264	ERR083881; SC_RUN_7038_3#15	UK	2011	gastroenteritis	human stool	22	ST-22 complex	ERR083881
16062	OXC6265	ERR083882; SC_RUN_7038_3#16	UK	2011	gastroenteritis	human stool	48	ST-48 complex	ERR083882
16063	OXC6266	ERR083883; SC_RUN_7038_3#17	UK	2011	gastroenteritis	human stool	50	ST-21 complex	ERR083883
16065	OXC6268	ERR083885; SC_RUN_7038_3#19	UK	2011	gastroenteritis	human stool	61	ST-61 complex	ERR083885
16066	OXC6269	ERR083886; SC_RUN_7038_3#20	UK	2011	gastroenteritis	human stool	48	ST-48 complex	ERR083886
16067	OXC6270	ERR083887; SC_RUN_7038_3#21	UK	2011	gastroenteritis	human stool	21	ST-21 complex	ERR083887
16068	OXC6271	ERR083888; SC_RUN_7038_3#22	UK	2011	gastroenteritis	human stool	508	ST-508 complex	ERR083888
16069	OXC6272	ERR083889; SC_RUN_7038_3#23	UK	2011	gastroenteritis	human stool	844	ST-48 complex	ERR083889
16070	OXC6273	ERR083890; SC_RUN_7038_3#24	UK	2011	gastroenteritis	human stool	508	ST-508 complex	ERR083890
16071	OXC6274	ERR083891; SC_RUN_7038_3#25	UK	2011	gastroenteritis	human stool	51	ST-443 complex	ERR083891
16072	OXC6275	ERR083892; SC_RUN_7038_3#26	UK	2011	gastroenteritis	human stool	21	ST-21 complex	ERR083892
16074	OXC6277	ERR083894; SC_RUN_7038_3#28	UK	2011	gastroenteritis	human stool	50	ST-21 complex	ERR083894
16075	OXC6278	ERR083895; SC_RUN_7038_3#29	UK	2011	gastroenteritis	human stool	45	ST-45 complex	ERR083895
16076	OXC6279	ERR083896; SC_RUN_7038_3#30	UK	2011	gastroenteritis	human stool	2258		ERR083896
16078	OXC6281	ERR083897; SC_RUN_7038_3#31	UK	2011	gastroenteritis	human stool	2274		ERR083897
16079	OXC6282	ERR083898; SC_RUN_7038_3#32	UK	2011	gastroenteritis	human stool	53	ST-21 complex	ERR083898
16080	OXC6283	ERR083899; SC_RUN_7038_3#33	UK	2011	gastroenteritis	human stool	61	ST-61 complex	ERR083899
16081	OXC6284	ERR083900; SC_RUN_7038_3#34	UK	2011	gastroenteritis	human stool	48	ST-48 complex	ERR083900
16082	OXC6285	ERR083901; SC_RUN_7038_3#35	UK	2011	gastroenteritis	human stool	21	ST-21 complex	ERR083901
16083	OXC6286	ERR083902; SC_RUN_7038_3#36	UK	2011	gastroenteritis	human stool	50	ST-21 complex	ERR083902
16084	OXC6287	ERR083903; SC_RUN_7038_3#37	UK	2011	gastroenteritis	human stool	5718	ST-354 complex	ERR083903
16085	OXC6288	ERR083904; SC_RUN_7038_3#38	UK	2011	gastroenteritis	human stool	464	ST-464 complex	ERR083904
16086	OXC6289	ERR083905; SC_RUN_7038_3#39	UK	2011	gastroenteritis	human stool	50	ST-21 complex	ERR083905
16087	OXC6290	ERR083906; SC_RUN_7038_3#40	UK	2011	gastroenteritis	human stool	257	ST-257 complex	ERR083906
16088	OXC6291	ERR083907; SC_RUN_7038_3#41	UK	2011	gastroenteritis	human stool	2030	ST-257 complex	ERR083907
16089	OXC6292	ERR083908; SC_RUN_7038_3#42	UK	2011	gastroenteritis	human stool	50	ST-21 complex	ERR083908
16090	OXC6293	ERR083909; SC_RUN_7038_3#43	UK	2011	gastroenteritis	human stool	45	ST-45 complex	ERR083909
16091	OXC6294	ERR083910; SC_RUN_7038_3#44	UK	2011	gastroenteritis	human stool	583	ST-45 complex	ERR083910
16092	OXC6295	ERR083911; SC_RUN_7038_3#45	UK	2011	gastroenteritis	human stool	48	ST-48 complex	ERR083911
16095	OXC6298	ERR083914; SC_RUN_7038_3#48	UK	2011	gastroenteritis	human stool	354	ST-354 complex	ERR083914
16096	OXC6299	ERR083915; SC_RUN_7038_3#49	UK	2011	gastroenteritis	human stool	354	ST-354 complex	ERR083915
16097	OXC6300	ERR083916; SC_RUN_7038_3#50	UK	2011	gastroenteritis	human stool	2135	ST-21 complex	ERR083916
16098	OXC6301	ERR083917; SC_RUN_7038_3#51	UK	2011	gastroenteritis	human stool	861	ST-21 complex	ERR083917
16099	OXC6302	ERR083918; SC_RUN_7038_3#52	UK	2011	gastroenteritis	human stool	51	ST-443 complex	ERR083918
16100	OXC6303	ERR083919; SC_RUN_7038_3#53	UK	2011	gastroenteritis	human stool	19	ST-21 complex	ERR083919
16101	OXC6304	ERR083920; SC_RUN_7038_3#54	UK	2011	gastroenteritis	human stool	574	ST-574 complex	ERR083920
16102	OXC6305	ERR083921; SC_RUN_7038_3#55	UK	2011	gastroenteritis	human stool	861	ST-21 complex	ERR083921
16103	OXC6306	ERR083922; SC_RUN_7038_3#56	UK	2011	gastroenteritis	human stool	273	ST-206 complex	ERR083922
16104	OXC6307	ERR083923; SC_RUN_7038_3#57	UK	2011	gastroenteritis	human stool	273	ST-206 complex	ERR083923
16107	OXC6310	ERR083926; SC_RUN_7038_3#60	UK	2011	gastroenteritis	human stool	21	ST-21 complex	ERR083926
16108	OXC6311	ERR083927; SC_RUN_7038_3#61	UK	2011	gastroenteritis	human stool	51	ST-443 complex	ERR083927
16110	OXC6313	ERR083929; SC_RUN_7038_3#63	UK	2011	gastroenteritis	human stool	45	ST-45 complex	ERR083929
16111	OXC6314	ERR083930; SC_RUN_7038_3#64	UK	2011	gastroenteritis	human stool	45	ST-45 complex	ERR083930
16112	OXC6315	ERR083931; SC_RUN_7038_3#65	UK	2011	gastroenteritis	human stool	206	ST-206 complex	ERR083931
16113	OXC6316	ERR083932; SC_RUN_7038_3#66	UK	2011	gastroenteritis	human stool	51	ST-443 complex	ERR083932
16114	OXC6317	ERR083933; SC_RUN_7038_3#67	UK	2011	gastroenteritis	human stool	21	ST-21 complex	ERR083933
16115	OXC6318	ERR083934; SC_RUN_7038_3#68	UK	2011	gastroenteritis	human stool	356	ST-353 complex	ERR083934
16116	OXC6319	ERR083935; SC_RUN_7038_3#69	UK	2011	gastroenteritis	human stool	356	ST-353 complex	ERR083935
16117	OXC6320	ERR083936; SC_RUN_7038_3#70	UK	2011	gastroenteritis	human stool	986		ERR083936
16118	OXC6321	ERR083937; SC_RUN_7038_3#71	UK	2011	gastroenteritis	human stool	45	ST-45 complex	ERR083937
16119	OXC6322	ERR083938; SC_RUN_7038_3#72	UK	2011	gastroenteritis	human stool	2274		ERR083938
16120	OXC6323	ERR083939; SC_RUN_7038_3#73	UK	2011	gastroenteritis	human stool	574	ST-574 complex	ERR083939
16121	OXC6324	ERR083940; SC_RUN_7038_3#74	UK	2011	gastroenteritis	human stool	53	ST-21 complex	ERR083940
16122	OXC6325	ERR083941; SC_RUN_7038_3#75	UK	2011	gastroenteritis	human stool	19	ST-21 complex	ERR083941
16123	OXC6326	ERR083942; SC_RUN_7038_3#76	UK	2011	gastroenteritis	human stool	50	ST-21 complex	ERR083942
16124	OXC6327	ERR083943; SC_RUN_7038_3#77	UK	2011	gastroenteritis	human stool	3534		ERR083943
16125	OXC6328	ERR083944; SC_RUN_7038_3#78	UK	2011	gastroenteritis	human stool	48	ST-48 complex	ERR083944
16126	OXC6329	ERR083945; SC_RUN_7038_3#79	UK	2011	gastroenteritis	human stool	21	ST-21 complex	ERR083945
16127	OXC6330	ERR083946; SC_RUN_7038_3#80	UK	2011	gastroenteritis	human stool	583	ST-45 complex	ERR083946
16128	OXC6331	ERR083947; SC_RUN_7038_3#81	UK	2011	gastroenteritis	human stool	50	ST-21 complex	ERR083947
16129	OXC6332	ERR083948; SC_RUN_7038_3#82	UK	2011	gastroenteritis	human stool	677	ST-677 complex	ERR083948
16130	OXC6333	ERR083949; SC_RUN_7038_3#83	UK	2011	gastroenteritis	human stool	42	ST-42 complex	ERR083949
16131	OXC6334	ERR083950; SC_RUN_7038_3#84	UK	2011	gastroenteritis	human stool	21	ST-21 complex	ERR083950
16132	OXC6335	ERR083951; SC_RUN_7038_3#85	UK	2011	gastroenteritis	human stool	21	ST-21 complex	ERR083951
16133	OXC6336	ERR083952; SC_RUN_7038_3#86	UK	2011	gastroenteritis	human stool	986		ERR083952
16136	OXC6339	ERR083955; SC_RUN_7038_3#89	UK	2011	gastroenteritis	human stool	45	ST-45 complex	ERR083955
16137	OXC6340	ERR083956; SC_RUN_7038_3#90	UK	2011	gastroenteritis	human stool	262	ST-21 complex	ERR083956
16138	OXC6341	ERR083957; SC_RUN_7038_3#91	UK	2011	gastroenteritis	human stool	904	ST-607 complex	ERR083957
16139	OXC6342	ERR083958; SC_RUN_7038_3#92	UK	2011	gastroenteritis	human stool	51	ST-443 complex	ERR083958
16141	OXC6344	ERR083960; SC_RUN_7038_3#94	UK	2011	gastroenteritis	human stool	257	ST-257 complex	ERR083960
16142	OXC6345	ERR083961; SC_RUN_7038_3#95	UK	2011	gastroenteritis	human stool	48	ST-48 complex	ERR083961
16143	OXC6346	ERR083962; SC_RUN_7038_3#96	UK	2011	gastroenteritis	human stool	61	ST-61 complex	ERR083962
16144	OXC6347	ERR083963; SC_RUN_7065_7#1	UK	2011	gastroenteritis	human stool	50	ST-21 complex	ERR083963
16145	OXC6348	ERR083964; SC_RUN_7065_7#2	UK	2011	gastroenteritis	human stool	81	ST-61 complex	ERR083964
16146	OXC6349	ERR083965; SC_RUN_7065_7#3	UK	2011	gastroenteritis	human stool	933	ST-403 complex	ERR083965
16147	OXC6350	ERR083966; SC_RUN_7065_7#4	UK	2011	gastroenteritis	human stool	42	ST-42 complex	ERR083966
16148	OXC6351	ERR083967; SC_RUN_7065_7#5	UK	2011	gastroenteritis	human stool	45	ST-45 complex	ERR083967
16149	OXC6352	ERR083968; SC_RUN_7065_7#6	UK	2011	gastroenteritis	human stool	464	ST-464 complex	ERR083968
16150	OXC6353	ERR083969; SC_RUN_7065_7#7	UK	2011	gastroenteritis	human stool	5729		ERR083969
16151	OXC6354	ERR083970; SC_RUN_7065_7#8	UK	2011	gastroenteritis	human stool	48	ST-48 complex	ERR083970
16152	OXC6355	ERR083971; SC_RUN_7065_7#9	UK	2011	gastroenteritis	human stool	19	ST-21 complex	ERR083971
16153	OXC6356	ERR083972; SC_RUN_7065_7#10	UK	2011	gastroenteritis	human stool	464	ST-464 complex	ERR083972
16154	OXC6357	ERR083973; SC_RUN_7065_7#11	UK	2011	gastroenteritis	human stool	51	ST-443 complex	ERR083973
16155	OXC6358	ERR083974; SC_RUN_7065_7#12	UK	2011	gastroenteritis	human stool	233	ST-45 complex	ERR083974
16156	OXC6359	ERR083975; SC_RUN_7065_7#13	UK	2011	gastroenteritis	human stool	904	ST-607 complex	ERR083975
16157	OXC6360	ERR083976; SC_RUN_7065_7#14	UK	2011	gastroenteritis	human stool	2274		ERR083976
16158	OXC6361	ERR083977; SC_RUN_7065_7#15	UK	2011	gastroenteritis	human stool	574	ST-574 complex	ERR083977
16159	OXC6362	ERR083978; SC_RUN_7065_7#16	UK	2011	gastroenteritis	human stool	257	ST-257 complex	ERR083978
16160	OXC6363	ERR083979; SC_RUN_7065_7#17	UK	2011	gastroenteritis	human stool	658	ST-658 complex	ERR083979
16161	OXC6364	ERR083980; SC_RUN_7065_7#18	UK	2011	gastroenteritis	human stool	132	ST-508 complex	ERR083980
16162	OXC6365	ERR083981; SC_RUN_7065_7#19	UK	2011	gastroenteritis	human stool	45	ST-45 complex	ERR083981
16163	OXC6366	ERR083982; SC_RUN_7065_7#20	UK	2011	gastroenteritis	human stool	51	ST-443 complex	ERR083982
16164	OXC6367	ERR083983; SC_RUN_7065_7#21	UK	2011	gastroenteritis	human stool	53	ST-21 complex	ERR083983
16165	OXC6368	ERR083984; SC_RUN_7065_7#22	UK	2011	gastroenteritis	human stool	52	ST-52 complex	ERR083984
16166	OXC6369	ERR083985; SC_RUN_7065_7#23	UK	2011	gastroenteritis	human stool	267	ST-283 complex	ERR083985
16167	OXC6370	ERR083986; SC_RUN_7065_7#24	UK	2011	gastroenteritis	human stool	19	ST-21 complex	ERR083986
16170	OXC6373	ERR083989; SC_RUN_7065_7#27	UK	2011	gastroenteritis	human stool	267	ST-283 complex	ERR083989
16171	OXC6374	ERR083990; SC_RUN_7065_7#28	UK	2011	gastroenteritis	human stool	5739		ERR083990
16172	OXC6375	ERR083991; SC_RUN_7065_7#29	UK	2011	gastroenteritis	human stool	257	ST-257 complex	ERR083991
16174	OXC6377	ERR083993; SC_RUN_7065_7#31	UK	2011	gastroenteritis	human stool	48	ST-48 complex	ERR083993
16176	OXC6379	ERR083995; SC_RUN_7065_7#33	UK	2011	gastroenteritis	human stool	5726	ST-21 complex	ERR083995
16178	OXC6381	ERR083997; SC_RUN_7065_7#35	UK	2011	gastroenteritis	human stool	523	ST-658 complex	ERR083997
16179	OXC6382	ERR083998; SC_RUN_7065_7#36	UK	2011	gastroenteritis	human stool	572	ST-206 complex	ERR083998
16180	OXC6383	ERR083999; SC_RUN_7065_7#37	UK	2011	gastroenteritis	human stool	21	ST-21 complex	ERR083999
16181	OXC6384	ERR084000; SC_RUN_7065_7#38	UK	2011	gastroenteritis	human stool	19	ST-21 complex	ERR084000
16184	OXC6387	ERR084003; SC_RUN_7065_7#41	UK	2011	gastroenteritis	human stool	227	ST-206 complex	ERR084003
16185	OXC6388	ERR084004; SC_RUN_7065_7#42	UK	2011	gastroenteritis	human stool	42	ST-42 complex	ERR084004
16186	OXC6389	ERR084005; SC_RUN_7065_7#43	UK	2011	gastroenteritis	human stool	475	ST-48 complex	ERR084005
16187	OXC6390	ERR084006; SC_RUN_7065_7#44	UK	2011	gastroenteritis	human stool	257	ST-257 complex	ERR084006
16188	OXC6391	ERR084007; SC_RUN_7065_7#45	UK	2011	gastroenteritis	human stool	574	ST-574 complex	ERR084007
16189	OXC6392	ERR084008; SC_RUN_7065_7#46	UK	2011	gastroenteritis	human stool	574	ST-574 complex	ERR084008
16190	OXC6393	ERR084009; SC_RUN_7065_7#47	UK	2011	gastroenteritis	human stool	5727	ST-21 complex	ERR084009
16191	OXC6394	ERR084010; SC_RUN_7065_7#48	UK	2011	gastroenteritis	human stool	19	ST-21 complex	ERR084010
16193	OXC6396	ERR084012; SC_RUN_7065_7#50	UK	2011	gastroenteritis	human stool	51	ST-443 complex	ERR084012
16194	OXC6397	ERR084013; SC_RUN_7065_7#51	UK	2011	gastroenteritis	human stool	122	ST-206 complex	ERR084013
16196	OXC6401	ERR084015; SC_RUN_7065_7#53	UK	2011	gastroenteritis	human stool	257	ST-257 complex	ERR084015
16197	OXC6402	ERR084016; SC_RUN_7065_7#54	UK	2011	gastroenteritis	human stool	61	ST-61 complex	ERR084016
16198	OXC6403	ERR084017; SC_RUN_7065_7#55	UK	2011	gastroenteritis	human stool	48	ST-48 complex	ERR084017
16199	OXC6404	ERR084018; SC_RUN_7065_7#56	UK	2011	gastroenteritis	human stool	2030	ST-257 complex	ERR084018
16200	OXC6405	ERR084019; SC_RUN_7065_7#57	UK	2011	gastroenteritis	human stool	21	ST-21 complex	ERR084019
16201	OXC6406	ERR084020; SC_RUN_7065_7#58	UK	2011	gastroenteritis	human stool	1947	ST-22 complex	ERR084020
16202	OXC6407	ERR084021; SC_RUN_7065_7#59	UK	2011	gastroenteritis	human stool	257	ST-257 complex	ERR084021
16203	OXC6408	ERR084022; SC_RUN_7065_7#60	UK	2011	gastroenteritis	human stool	585		ERR084022
16204	OXC6409	ERR084023; SC_RUN_7065_7#61	UK	2011	gastroenteritis	human stool	42	ST-42 complex	ERR084023
16205	OXC6410	ERR084024; SC_RUN_7065_7#62	UK	2011	gastroenteritis	human stool	5728	ST-433 complex	ERR084024
16206	OXC6411	ERR084025; SC_RUN_7065_7#63	UK	2011	gastroenteritis	human stool	48	ST-48 complex	ERR084025
16207	OXC6412	ERR084026; SC_RUN_7065_7#64	UK	2011	gastroenteritis	human stool	257	ST-257 complex	ERR084026
16208	OXC6413	ERR084027; SC_RUN_7065_7#65	UK	2011	gastroenteritis	human stool	429	ST-48 complex	ERR084027
16209	OXC6414	ERR084028; SC_RUN_7065_7#66	UK	2011	gastroenteritis	human stool	22	ST-22 complex	ERR084028
16210	OXC6415	ERR084029; SC_RUN_7065_7#67	UK	2011	gastroenteritis	human stool	42	ST-42 complex	ERR084029
16212	OXC6417	ERR084031; SC_RUN_7065_7#69	UK	2011	gastroenteritis	human stool	42	ST-42 complex	ERR084031
16213	OXC6418	ERR084032; SC_RUN_7065_7#70	UK	2011	gastroenteritis	human stool	354	ST-354 complex	ERR084032
16214	OXC6419	ERR084033; SC_RUN_7065_7#71	UK	2011	gastroenteritis	human stool	45	ST-45 complex	ERR084033
16215	OXC6420	ERR084034; SC_RUN_7065_7#72	UK	2011	gastroenteritis	human stool	21	ST-21 complex	ERR084034
16216	OXC6421	ERR084035; SC_RUN_7065_7#73	UK	2011	gastroenteritis	human stool	48	ST-48 complex	ERR084035
16217	OXC6422	ERR084036; SC_RUN_7065_7#74	UK	2011	gastroenteritis	human stool	572	ST-206 complex	ERR084036
16218	OXC6423	ERR084037; SC_RUN_7065_7#75	UK	2011	gastroenteritis	human stool	464	ST-464 complex	ERR084037
16222	OXC6427	ERR084041; SC_RUN_7065_7#79	UK	2011	gastroenteritis	human stool	2844	ST-460 complex	ERR084041
16224	OXC6429	ERR084043; SC_RUN_7065_7#81	UK	2011	gastroenteritis	human stool	5018	ST-21 complex	ERR084043
16225	OXC6430	ERR084044; SC_RUN_7065_7#82	UK	2011	gastroenteritis	human stool	572	ST-206 complex	ERR084044
16226	OXC6431	ERR084045; SC_RUN_7065_7#83	UK	2011	gastroenteritis	human stool	1709	ST-1034 complex	ERR084045
16227	OXC6432	ERR084046; SC_RUN_7065_7#84	UK	2011	gastroenteritis	human stool	614	ST-52 complex	ERR084046
16228	OXC6433	ERR084047; SC_RUN_7065_7#85	UK	2011	gastroenteritis	human stool	573	ST-573 complex	ERR084047
16230	OXC6435	ERR084049; SC_RUN_7065_7#87	UK	2011	gastroenteritis	human stool	573	ST-573 complex	ERR084049
16231	OXC6436	ERR084050; SC_RUN_7065_7#88	UK	2011	gastroenteritis	human stool	1044	ST-658 complex	ERR084050
16232	OXC6437	ERR084051; SC_RUN_7065_7#89	UK	2011	gastroenteritis	human stool	45	ST-45 complex	ERR084051
16233	OXC6438	ERR084052; SC_RUN_7065_7#90	UK	2011	gastroenteritis	human stool	5	ST-353 complex	ERR084052
16234	OXC6440	ERR084053; SC_RUN_7065_7#91	UK	2011	gastroenteritis	human stool	51	ST-443 complex	ERR084053
16235	OXC6441	ERR084054; SC_RUN_7065_7#92	UK	2011	gastroenteritis	human stool	52	ST-52 complex	ERR084054
16239	OXC6446	ERR084058; SC_RUN_7065_7#96	UK	2011	gastroenteritis	human stool	3029		ERR084058
16241	OXC6448	ERR084060; SC_RUN_7092_1#2	UK	2011	gastroenteritis	human stool	137	ST-45 complex	ERR084060
16242	OXC6449	ERR084061; SC_RUN_7092_1#3	UK	2011	gastroenteritis	human stool	50	ST-21 complex	ERR084061
16243	OXC6450	ERR084062; SC_RUN_7092_1#4	UK	2011	gastroenteritis	human stool	257	ST-257 complex	ERR084062
16244	OXC6451	ERR084063; SC_RUN_7092_1#5	UK	2011	gastroenteritis	human stool	354	ST-354 complex	ERR084063
16245	OXC6453	ERR084064; SC_RUN_7092_1#6	UK	2011	gastroenteritis	human stool	61	ST-61 complex	ERR084064
16246	OXC6454	ERR084065; SC_RUN_7092_1#7	UK	2011	gastroenteritis	human stool	572	ST-206 complex	ERR084065
16247	OXC6455	ERR084066; SC_RUN_7092_1#8	UK	2011	gastroenteritis	human stool	5730	ST-353 complex	ERR084066
16248	OXC6456	ERR084067; SC_RUN_7092_1#9	UK	2011	gastroenteritis	human stool	353	ST-353 complex	ERR084067
16249	OXC6457	ERR084068; SC_RUN_7092_1#10	UK	2011	gastroenteritis	human stool	50	ST-21 complex	ERR084068
16250	OXC6458	ERR084069; SC_RUN_7092_1#11	UK	2011	gastroenteritis	human stool	5731	ST-464 complex	ERR084069
16251	OXC6459	ERR084070; SC_RUN_7092_1#12	UK	2011	gastroenteritis	human stool	50	ST-21 complex	ERR084070
16253	OXC6461	ERR084072; SC_RUN_7092_1#14	UK	2011	gastroenteritis	human stool	50	ST-21 complex	ERR084072
16254	OXC6462	ERR084073; SC_RUN_7092_1#15	UK	2011	gastroenteritis	human stool	572	ST-206 complex	ERR084073
16255	OXC6463	ERR084074; SC_RUN_7092_1#16	UK	2011	gastroenteritis	human stool	1709	ST-1034 complex	ERR084074
16256	OXC6464	ERR084075; SC_RUN_7092_1#17	UK	2011	gastroenteritis	human stool	5018	ST-21 complex	ERR084075
16257	OXC6465	ERR084076; SC_RUN_7092_1#18	UK	2011	gastroenteritis	human stool	572	ST-206 complex	ERR084076
16258	OXC6466	ERR084077; SC_RUN_7092_1#19	UK	2011	gastroenteritis	human stool	904	ST-607 complex	ERR084077
16259	OXC6467	ERR084078; SC_RUN_7092_1#20	UK	2011	gastroenteritis	human stool	2030	ST-257 complex	ERR084078
16260	OXC6468	ERR084079; SC_RUN_7092_1#21	UK	2011	gastroenteritis	human stool	5732	ST-464 complex	ERR084079
16261	OXC6469	ERR084080; SC_RUN_7092_1#22	UK	2011	gastroenteritis	human stool	2030	ST-257 complex	ERR084080
16262	OXC6470	ERR084081; SC_RUN_7092_1#23	UK	2011	gastroenteritis	human stool	572	ST-206 complex	ERR084081
16265	OXC6473	ERR084084; SC_RUN_7092_1#26	UK	2011	gastroenteritis	human stool	5	ST-353 complex	ERR084084
16267	OXC6475	ERR084086; SC_RUN_7092_1#28	UK	2011	gastroenteritis	human stool	5136	ST-464 complex	ERR084086
16269	OXC6477	ERR084088; SC_RUN_7092_1#30	UK	2011	gastroenteritis	human stool	572	ST-206 complex	ERR084088
16270	OXC6478	ERR084089; SC_RUN_7092_1#31	UK	2011	gastroenteritis	human stool	5	ST-353 complex	ERR084089
16271	OXC6479	ERR084090; SC_RUN_7092_1#32	UK	2011	gastroenteritis	human stool	883	ST-21 complex	ERR084090
16272	OXC6480	ERR084091; SC_RUN_7092_1#33	UK	2011	gastroenteritis	human stool	1301	ST-692 complex	ERR084091
16273	OXC6481	ERR084092; SC_RUN_7092_1#34	UK	2011	gastroenteritis	human stool	2361	ST-443 complex	ERR084092
16274	OXC6482	ERR084093; SC_RUN_7092_1#35	UK	2011	gastroenteritis	human stool	220	ST-179 complex	ERR084093
16275	OXC6483	ERR084094; SC_RUN_7092_1#36	UK	2011	gastroenteritis	human stool	21	ST-21 complex	ERR084094
16276	OXC6484	ERR084095; SC_RUN_7092_1#37	UK	2011	gastroenteritis	human stool	403	ST-403 complex	ERR084095
16277	OXC6485	ERR084096; SC_RUN_7092_1#38	UK	2011	gastroenteritis	human stool	403	ST-403 complex	ERR084096
16278	OXC6486	ERR084097; SC_RUN_7092_1#39	UK	2011	gastroenteritis	human stool	2274		ERR084097
16279	OXC6487	ERR084098; SC_RUN_7092_1#40	UK	2011	gastroenteritis	human stool	48	ST-48 complex	ERR084098
16280	OXC6488	ERR084099; SC_RUN_7092_1#41	UK	2011	gastroenteritis	human stool	48	ST-48 complex	ERR084099
16281	OXC6489	ERR084100; SC_RUN_7092_1#42	UK	2011	gastroenteritis	human stool	50	ST-21 complex	ERR084100
16282	OXC6490	ERR084101; SC_RUN_7092_1#43	UK	2011	gastroenteritis	human stool	61	ST-61 complex	ERR084101
16283	OXC6491	ERR084102; SC_RUN_7092_1#44	UK	2011	gastroenteritis	human stool	257	ST-257 complex	ERR084102
16284	OXC6492	ERR084103; SC_RUN_7092_1#45	UK	2011	gastroenteritis	human stool	1044	ST-658 complex	ERR084103
16285	OXC6493	ERR084104; SC_RUN_7092_1#46	UK	2011	gastroenteritis	human stool	50	ST-21 complex	ERR084104
16286	OXC6494	ERR084105; SC_RUN_7092_1#47	UK	2011	gastroenteritis	human stool	353	ST-353 complex	ERR084105
16287	OXC6495	ERR084106; SC_RUN_7092_1#48	UK	2011	gastroenteritis	human stool	572	ST-206 complex	ERR084106
16288	OXC6496	ERR084107; SC_RUN_7092_1#49	UK	2011	gastroenteritis	human stool	21	ST-21 complex	ERR084107
16289	OXC6497	ERR084108; SC_RUN_7092_1#50	UK	2011	gastroenteritis	human stool	5	ST-353 complex	ERR084108
16290	OXC6498	ERR084109; SC_RUN_7092_1#51	UK	2011	gastroenteritis	human stool	1709	ST-1034 complex	ERR084109
16291	OXC6499	ERR084110; SC_RUN_7092_1#52	UK	2011	gastroenteritis	human stool	2030	ST-257 complex	ERR084110
16292	OXC6500	ERR084111; SC_RUN_7092_1#53	UK	2011	gastroenteritis	human stool	2135	ST-21 complex	ERR084111
16293	OXC6501	ERR084112; SC_RUN_7092_1#54	UK	2011	gastroenteritis	human stool	48	ST-48 complex	ERR084112
16294	OXC6502	ERR084113; SC_RUN_7092_1#55	UK	2011	gastroenteritis	human stool	50	ST-21 complex	ERR084113
16295	OXC6503	ERR084114; SC_RUN_7092_1#56	UK	2011	gastroenteritis	human stool	51	ST-443 complex	ERR084114
16297	OXC6505	ERR084116; SC_RUN_7092_1#58	UK	2011	gastroenteritis	human stool	141	ST-21 complex	ERR084116
16298	OXC6506	ERR084117; SC_RUN_7092_1#59	UK	2011	gastroenteritis	human stool	1044	ST-658 complex	ERR084117
16299	OXC6507	ERR084118; SC_RUN_7092_1#60	UK	2011	gastroenteritis	human stool	5	ST-353 complex	ERR084118
16300	OXC6508	ERR084119; SC_RUN_7092_1#61	UK	2011	gastroenteritis	human stool	21	ST-21 complex	ERR084119
16301	OXC6509	ERR084120; SC_RUN_7092_1#62	UK	2011	gastroenteritis	human stool	1040	ST-574 complex	ERR084120
16302	OXC6510	ERR084121; SC_RUN_7092_1#63	UK	2011	gastroenteritis	human stool	267	ST-283 complex	ERR084121
16303	OXC6511	ERR084122; SC_RUN_7092_1#64	UK	2011	gastroenteritis	human stool	267	ST-283 complex	ERR084122
16304	OXC6512	ERR084123; SC_RUN_7092_1#65	UK	2011	gastroenteritis	human stool	42	ST-42 complex	ERR084123
16306	OXC6514	ERR084125; SC_RUN_7092_1#67	UK	2011	gastroenteritis	human stool	3102	ST-21 complex	ERR084125
16307	OXC6515	ERR084126; SC_RUN_7092_1#68	UK	2011	gastroenteritis	human stool	845	ST-45 complex	ERR084126
16308	OXC6516	ERR084127; SC_RUN_7092_1#69	UK	2011	gastroenteritis	human stool	53	ST-21 complex	ERR084127
16309	OXC6517	ERR084128; SC_RUN_7092_1#70	UK	2011	gastroenteritis	human stool	354	ST-354 complex	ERR084128
16310	OXC6518	ERR084129; SC_RUN_7092_1#71	UK	2011	gastroenteritis	human stool	354	ST-354 complex	ERR084129
16311	OXC6519	ERR084130; SC_RUN_7092_1#72	UK	2011	gastroenteritis	human stool	21	ST-21 complex	ERR084130
16312	OXC6520	ERR084131; SC_RUN_7092_1#73	UK	2011	gastroenteritis	human stool	5	ST-353 complex	ERR084131
16313	OXC6521	ERR084132; SC_RUN_7092_1#74	UK	2011	gastroenteritis	human stool	47	ST-21 complex	ERR084132
16314	OXC6522	ERR084133; SC_RUN_7092_1#75	UK	2011	gastroenteritis	human stool	206	ST-206 complex	ERR084133
16316	OXC6524	ERR084135; SC_RUN_7092_1#77	UK	2011	gastroenteritis	human stool	50	ST-21 complex	ERR084135
16317	OXC6525	ERR084136; SC_RUN_7092_1#78	UK	2011	gastroenteritis	human stool	122	ST-206 complex	ERR084136
16318	OXC6526	ERR084137; SC_RUN_7092_1#79	UK	2011	gastroenteritis	human stool	990	ST-257 complex	ERR084137
16319	OXC6527	ERR084138; SC_RUN_7092_1#80	UK	2011	gastroenteritis	human stool	50	ST-21 complex	ERR084138
16320	OXC6528	ERR084139; SC_RUN_7092_1#81	UK	2011	gastroenteritis	human stool	5738		ERR084139
16321	OXC6529	ERR084140; SC_RUN_7092_1#82	UK	2011	gastroenteritis	human stool	354	ST-354 complex	ERR084140
16322	OXC6530	ERR084141; SC_RUN_7092_1#83	UK	2011	gastroenteritis	human stool	50	ST-21 complex	ERR084141
16323	OXC6531	ERR084142; SC_RUN_7092_1#84	UK	2011	gastroenteritis	human stool	50	ST-21 complex	ERR084142
16324	OXC6532	ERR084143; SC_RUN_7092_1#85	UK	2011	gastroenteritis	human stool	273	ST-206 complex	ERR084143
16325	OXC6533	ERR084144; SC_RUN_7092_1#86	UK	2011	gastroenteritis	human stool	658	ST-658 complex	ERR084144
16326	OXC6534	ERR084145; SC_RUN_7092_1#87	UK	2011	gastroenteritis	human stool	122	ST-206 complex	ERR084145
16327	OXC6535	ERR084146; SC_RUN_7092_1#88	UK	2011	gastroenteritis	human stool	22	ST-22 complex	ERR084146
16328	OXC6536	ERR084147; SC_RUN_7092_1#89	UK	2011	gastroenteritis	human stool	45	ST-45 complex	ERR084147
16330	OXC6538	ERR084149; SC_RUN_7092_1#91	UK	2011	gastroenteritis	human stool	19	ST-21 complex	ERR084149
16331	OXC6539	ERR084150; SC_RUN_7092_1#92	UK	2011	gastroenteritis	human stool	21	ST-21 complex	ERR084150
16332	OXC6540	ERR084151; SC_RUN_7092_1#93	UK	2011	gastroenteritis	human stool	587	ST-362 complex	ERR084151
16333	OXC6541	ERR084152; SC_RUN_7092_1#94	UK	2011	gastroenteritis	human stool	5136	ST-464 complex	ERR084152
16334	OXC6542	ERR084153; SC_RUN_7092_1#95	UK	2011	gastroenteritis	human stool	573	ST-573 complex	ERR084153
16335	OXC6543	ERR084154; SC_RUN_7092_1#96	UK	2011	gastroenteritis	human stool	50	ST-21 complex	ERR084154
16336	OXC6255	ERR083872; SC_RUN_7038_3#6	UK	2011	gastroenteritis	human stool	21	ST-21 complex	ERR083872
16341	OXC6590	ERR108354; SC_RUN_7213_3#47	UK	2011	gastroenteritis	human stool	50	ST-21 complex	ERR108354
16342	OXC6591	ERR108355; SC_RUN_7213_3#48	UK	2011	gastroenteritis	human stool	5	ST-353 complex	ERR108355
16343	OXC6592	ERR108356; SC_RUN_7213_3#49	UK	2011	gastroenteritis	human stool	137	ST-45 complex	ERR108356
16346	OXC6595	ERR108359; SC_RUN_7213_3#52	UK	2011	gastroenteritis	human stool	573	ST-573 complex	ERR108359
16347	OXC6596	ERR108360; SC_RUN_7213_3#53	UK	2011	gastroenteritis	human stool	21	ST-21 complex	ERR108360
16349	OXC6598	ERR108362; SC_RUN_7213_3#55	UK	2011	gastroenteritis	human stool	50	ST-21 complex	ERR108362
16350	OXC6599	ERR108363; SC_RUN_7213_3#56	UK	2011	gastroenteritis	human stool	2314	ST-1034 complex	ERR108363
16351	OXC6600	ERR108364; SC_RUN_7213_3#57	UK	2011	gastroenteritis	human stool	50	ST-21 complex	ERR108364
16353	OXC6602	ERR108366; SC_RUN_7213_3#59	UK	2011	gastroenteritis	human stool	21	ST-21 complex	ERR108366
16354	OXC6603	ERR108367; SC_RUN_7213_3#60	UK	2011	gastroenteritis	human stool	19	ST-21 complex	ERR108367
16355	OXC6604	ERR108368; SC_RUN_7213_3#61	UK	2011	gastroenteritis	human stool	21	ST-21 complex	ERR108368
16358	OXC6608	ERR108371; SC_RUN_7213_3#64	UK	2011	gastroenteritis	human stool	1073	ST-354 complex	ERR108371
16359	OXC6609	ERR108372; SC_RUN_7213_3#65	UK	2011	gastroenteritis	human stool	51	ST-443 complex	ERR108372
16360	OXC6610	ERR108373; SC_RUN_7213_3#66	UK	2011	gastroenteritis	human stool	573	ST-573 complex	ERR108373
16361	OXC6611	ERR108374; SC_RUN_7213_3#67	UK	2011	gastroenteritis	human stool	353	ST-353 complex	ERR108374
16362	OXC6612	ERR108375; SC_RUN_7213_3#68	UK	2011	gastroenteritis	human stool	257	ST-257 complex	ERR108375
16363	OXC6613	ERR108376; SC_RUN_7213_3#69	UK	2011	gastroenteritis	human stool	50	ST-21 complex	ERR108376
16364	OXC6614	ERR108377; SC_RUN_7213_3#70	UK	2011	gastroenteritis	human stool	233	ST-45 complex	ERR108377
16365	OXC6615	ERR108378; SC_RUN_7213_3#71	UK	2011	gastroenteritis	human stool	50	ST-21 complex	ERR108378
16366	OXC6616	ERR108379; SC_RUN_7213_3#72	UK	2011	gastroenteritis	human stool	21	ST-21 complex	ERR108379
16367	OXC6618	ERR108380; SC_RUN_7213_3#73	UK	2011	gastroenteritis	human stool	1900	ST-658 complex	ERR108380
16368	OXC6619	ERR108381; SC_RUN_7213_3#74	UK	2011	gastroenteritis	human stool	21	ST-21 complex	ERR108381
16369	OXC6620	ERR108382; SC_RUN_7213_3#75	UK	2011	gastroenteritis	human stool	51	ST-443 complex	ERR108382
16370	OXC6621	ERR108383; SC_RUN_7213_3#76	UK	2011	gastroenteritis	human stool	464	ST-464 complex	ERR108383
16371	OXC6622	ERR108384; SC_RUN_7213_3#77	UK	2011	gastroenteritis	human stool	595	ST-353 complex	ERR108384
16372	OXC6623	ERR108385; SC_RUN_7213_3#78	UK	2011	gastroenteritis	human stool	222	ST-206 complex	ERR108385
16373	OXC6624	ERR108386; SC_RUN_7213_3#79	UK	2011	gastroenteritis	human stool	45	ST-45 complex	ERR108386
16374	OXC6625	ERR108387; SC_RUN_7213_3#80	UK	2011	gastroenteritis	human stool	21	ST-21 complex	ERR108387
16375	OXC6626	ERR108388; SC_RUN_7213_3#81	UK	2011	gastroenteritis	human stool	22	ST-22 complex	ERR108388
16376	OXC6627	ERR108389; SC_RUN_7213_3#82	UK	2011	gastroenteritis	human stool	21	ST-21 complex	ERR108389
16377	OXC6628	ERR108390; SC_RUN_7213_3#83	UK	2011	gastroenteritis	human stool	441		ERR108390
16378	OXC6629	ERR108391; SC_RUN_7213_3#84	UK	2011	gastroenteritis	human stool	21	ST-21 complex	ERR108391
16380	OXC6631	ERR108393; SC_RUN_7213_3#86	UK	2011	gastroenteritis	human stool	2401		ERR108393
16381	OXC6632	ERR108394; SC_RUN_7213_3#87	UK	2011	gastroenteritis	human stool	61	ST-61 complex	ERR108394
16382	OXC6633	ERR108395; SC_RUN_7213_3#88	UK	2011	gastroenteritis	human stool	53	ST-21 complex	ERR108395
16383	OXC6634	ERR108396; SC_RUN_7213_3#89	UK	2011	gastroenteritis	human stool	882		ERR108396
16384	OXC6635	ERR108397; SC_RUN_7213_3#90	UK	2011	gastroenteritis	human stool	5136	ST-464 complex	ERR108397
16385	OXC6636	ERR108398; SC_RUN_7213_3#91	UK	2011	gastroenteritis	human stool	50	ST-21 complex	ERR108398
16386	OXC6637	ERR108399; SC_RUN_7213_3#92	UK	2011	gastroenteritis	human stool	21	ST-21 complex	ERR108399
16387	OXC6638	ERR108400; SC_RUN_7213_3#93	UK	2011	gastroenteritis	human stool	48	ST-48 complex	ERR108400
16388	OXC6639	ERR108401; SC_RUN_7213_3#94	UK	2011	gastroenteritis	human stool	132	ST-508 complex	ERR108401
16389	OXC6640	ERR108402; SC_RUN_7213_3#95	UK	2011	gastroenteritis	human stool	464	ST-464 complex	ERR108402
16390	OXC6641	ERR108403; SC_RUN_7213_3#96	UK	2011	gastroenteritis	human stool	22	ST-22 complex	ERR108403
18199	OXC6642	ERR128727; SC_RUN_7712_5#1	UK	2011	gastroenteritis	human stool	21	ST-21 complex	ERR128727
18200	OXC6643	ERR128728; SC_RUN_7712_5#2	UK	2011	gastroenteritis	human stool	53	ST-21 complex	ERR128728
18201	OXC6644	ERR128729; SC_RUN_7712_5#3	UK	2011	gastroenteritis	human stool	22	ST-22 complex	ERR128729
18202	OXC6645	ERR128730; SC_RUN_7712_5#4	UK	2011	gastroenteritis	human stool	22	ST-22 complex	ERR128730
18203	OXC6646	ERR128731; SC_RUN_7712_5#5	UK	2011	gastroenteritis	human stool	48	ST-48 complex	ERR128731
18204	OXC6647	ERR128732; SC_RUN_7712_5#6	UK	2011	gastroenteritis	human stool	354	ST-354 complex	ERR128732
18205	OXC6648	ERR128733; SC_RUN_7712_5#7	UK	2011	gastroenteritis	human stool	48	ST-48 complex	ERR128733
18206	OXC6649	ERR128734; SC_RUN_7712_5#8	UK	2011	gastroenteritis	human stool	51	ST-443 complex	ERR128734
18207	OXC6650	ERR128735; SC_RUN_7712_5#9	UK	2011	gastroenteritis	human stool	257	ST-257 complex	ERR128735
18209	OXC6652	ERR128737; SC_RUN_7712_5#11	UK	2011	gastroenteritis	human stool	48	ST-48 complex	ERR128737
18210	OXC6653	ERR128738; SC_RUN_7712_5#12	UK	2011	gastroenteritis	human stool	2844	ST-460 complex	ERR128738
18211	OXC6654	ERR128739; SC_RUN_7712_5#13	UK	2011	gastroenteritis	human stool	257	ST-257 complex	ERR128739
18212	OXC6655	ERR128740; SC_RUN_7712_5#14	UK	2011	gastroenteritis	human stool	991	ST-692 complex	ERR128740
18213	OXC6656	ERR128741; SC_RUN_7712_5#15	UK	2011	gastroenteritis	human stool	53	ST-21 complex	ERR128741
18214	OXC6657	ERR128742; SC_RUN_7712_5#16	UK	2011	gastroenteritis	human stool	464	ST-464 complex	ERR128742
18215	OXC6658	ERR128743; SC_RUN_7712_5#17	UK	2011	gastroenteritis	human stool	353	ST-353 complex	ERR128743
18217	OXC6660	ERR128745; SC_RUN_7712_5#19	UK	2011	gastroenteritis	human stool	508	ST-508 complex	ERR128745
18218	OXC6661	ERR128746; SC_RUN_7712_5#20	UK	2011	gastroenteritis	human stool	273	ST-206 complex	ERR128746
18219	OXC6662	ERR128747; SC_RUN_7712_5#21	UK	2011	gastroenteritis	human stool	5808	ST-460 complex	ERR128747
18220	OXC6663	ERR128748; SC_RUN_7712_5#22	UK	2011	gastroenteritis	human stool	2844	ST-460 complex	ERR128748
18221	OXC6664	ERR128749; SC_RUN_7712_5#23	UK	2011	gastroenteritis	human stool	50	ST-21 complex	ERR128749
18222	OXC6665	ERR128750; SC_RUN_7712_5#24	UK	2011	gastroenteritis	human stool	50	ST-21 complex	ERR128750
18223	OXC6666	ERR128751; SC_RUN_7712_5#25	UK	2011	gastroenteritis	human stool	50	ST-21 complex	ERR128751
18224	OXC6667	ERR128752; SC_RUN_7712_5#26	UK	2011	gastroenteritis	human stool	44	ST-21 complex	ERR128752
18225	OXC6668	ERR128753; SC_RUN_7712_5#27	UK	2011	gastroenteritis	human stool	51	ST-443 complex	ERR128753
18226	OXC6669	ERR128754; SC_RUN_7712_5#28	UK	2011	gastroenteritis	human stool	775	ST-52 complex	ERR128754
18227	OXC6670	ERR128755; SC_RUN_7712_5#29	UK	2011	gastroenteritis	human stool	2844	ST-460 complex	ERR128755
18228	OXC6671	ERR128756; SC_RUN_7712_5#30	UK	2011	gastroenteritis	human stool	21	ST-21 complex	ERR128756
18229	OXC6672	ERR128757; SC_RUN_7712_5#31	UK	2011	gastroenteritis	human stool	47	ST-21 complex	ERR128757
18230	OXC6673	ERR128758; SC_RUN_7712_5#32	UK	2011	gastroenteritis	human stool	50	ST-21 complex	ERR128758
18231	OXC6674	ERR128759; SC_RUN_7712_5#33	UK	2011	gastroenteritis	human stool	441		ERR128759
18232	OXC6675	ERR128760; SC_RUN_7712_5#34	UK	2011	gastroenteritis	human stool	986		ERR128760
18233	OXC6676	ERR128761; SC_RUN_7712_5#35	UK	2011	gastroenteritis	human stool	5809	ST-206 complex	ERR128761
18234	OXC6677	ERR128762; SC_RUN_7712_5#36	UK	2011	gastroenteritis	human stool	50	ST-21 complex	ERR128762
18235	OXC6678	ERR128763; SC_RUN_7712_5#37	UK	2011	gastroenteritis	human stool	21	ST-21 complex	ERR128763
18236	OXC6679	ERR128764; SC_RUN_7712_5#38	UK	2011	gastroenteritis	human stool	658	ST-658 complex	ERR128764
18237	OXC6680	ERR128765; SC_RUN_7712_5#39	UK	2011	gastroenteritis	human stool	574	ST-574 complex	ERR128765
18238	OXC6681	ERR128766; SC_RUN_7712_5#40	UK	2011	gastroenteritis	human stool	21	ST-21 complex	ERR128766
18239	OXC6682	ERR128767; SC_RUN_7712_5#41	UK	2011	gastroenteritis	human stool	53	ST-21 complex	ERR128767
18240	OXC6683	ERR128768; SC_RUN_7712_5#42	UK	2011	gastroenteritis	human stool	270	ST-403 complex	ERR128768
18243	OXC6686	ERR128771; SC_RUN_7712_5#45	UK	2011	gastroenteritis	human stool	4373		ERR128771
18245	OXC6688	ERR128773; SC_RUN_7712_5#47	UK	2011	gastroenteritis	human stool	61	ST-61 complex	ERR128773
18246	OXC6689	ERR128774; SC_RUN_7712_5#48	UK	2011	gastroenteritis	human stool	21	ST-21 complex	ERR128774
18247	OXC6690	ERR128775; SC_RUN_7712_5#49	UK	2011	gastroenteritis	human stool	21	ST-21 complex	ERR128775
18248	OXC6691	ERR128776; SC_RUN_7712_5#50	UK	2011	gastroenteritis	human stool	190	ST-21 complex	ERR128776
18249	OXC6692	ERR128777; SC_RUN_7712_5#51	UK	2011	gastroenteritis	human stool	464	ST-464 complex	ERR128777
18250	OXC6693	ERR128778; SC_RUN_7712_5#52	UK	2011	gastroenteritis	human stool	48	ST-48 complex	ERR128778
18251	OXC6694	ERR128779; SC_RUN_7712_5#53	UK	2011	gastroenteritis	human stool	5136	ST-464 complex	ERR128779
18252	OXC6695	ERR128780; SC_RUN_7712_5#54	UK	2011	gastroenteritis	human stool	441		ERR128780
18253	OXC6696	ERR128781; SC_RUN_7712_5#55	UK	2011	gastroenteritis	human stool	257	ST-257 complex	ERR128781
18254	OXC6697	ERR128782; SC_RUN_7712_5#56	UK	2011	gastroenteritis	human stool	862	ST-446 complex	ERR128782
18255	OXC6698	ERR128783; SC_RUN_7712_5#57	UK	2011	gastroenteritis	human stool	354	ST-354 complex	ERR128783
18256	OXC6699	ERR128784; SC_RUN_7712_5#58	UK	2011	gastroenteritis	human stool	1071		ERR128784
18257	OXC6700	ERR128785; SC_RUN_7712_5#59	UK	2011	gastroenteritis	human stool	48	ST-48 complex	ERR128785
18258	OXC6701	ERR128786; SC_RUN_7712_5#60	UK	2011	gastroenteritis	human stool	464	ST-464 complex	ERR128786
18259	OXC6702	ERR128787; SC_RUN_7712_5#61	UK	2011	gastroenteritis	human stool	21	ST-21 complex	ERR128787
18260	OXC6703	ERR128788; SC_RUN_7712_5#62	UK	2011	gastroenteritis	human stool	19	ST-21 complex	ERR128788
18261	OXC6704	ERR128789; SC_RUN_7712_5#63	UK	2011	gastroenteritis	human stool	356	ST-353 complex	ERR128789
18263	OXC6706	ERR128791; SC_RUN_7712_5#65	UK	2011	gastroenteritis	human stool	19	ST-21 complex	ERR128791
18264	OXC6707	ERR128792; SC_RUN_7712_5#66	UK	2011	gastroenteritis	human stool	5	ST-353 complex	ERR128792
18265	OXC6708	ERR128793; SC_RUN_7712_5#67	UK	2011	gastroenteritis	human stool	22	ST-22 complex	ERR128793
18266	OXC6709	ERR128794; SC_RUN_7712_5#68	UK	2011	gastroenteritis	human stool	2030	ST-257 complex	ERR128794
18268	OXC6711	ERR128796; SC_RUN_7712_5#70	UK	2011	gastroenteritis	human stool	21	ST-21 complex	ERR128796
18269	OXC6712	ERR128797; SC_RUN_7712_5#71	UK	2011	gastroenteritis	human stool	21	ST-21 complex	ERR128797
18270	OXC6713	ERR128798; SC_RUN_7712_5#72	UK	2011	gastroenteritis	human stool	50	ST-21 complex	ERR128798
18271	OXC6714	ERR128799; SC_RUN_7712_5#73	UK	2011	gastroenteritis	human stool	50	ST-21 complex	ERR128799
18272	OXC6715	ERR128800; SC_RUN_7712_5#74	UK	2011	gastroenteritis	human stool	257	ST-257 complex	ERR128800
18273	OXC6716	ERR128801; SC_RUN_7712_5#75	UK	2011	gastroenteritis	human stool	354	ST-354 complex	ERR128801
18274	OXC6717	ERR128802; SC_RUN_7712_5#76	UK	2011	gastroenteritis	human stool	354	ST-354 complex	ERR128802
18275	OXC6718	ERR128803; SC_RUN_7712_5#77	UK	2011	gastroenteritis	human stool	48	ST-48 complex	ERR128803
18276	OXC6719	ERR128804; SC_RUN_7712_5#78	UK	2011	gastroenteritis	human stool	572	ST-206 complex	ERR128804
18277	OXC6720	ERR128805; SC_RUN_7712_5#79	UK	2011	gastroenteritis	human stool	572	ST-206 complex	ERR128805
18278	OXC6721	ERR128806; SC_RUN_7712_5#80	UK	2011	gastroenteritis	human stool	48	ST-48 complex	ERR128806
18279	OXC6722	ERR128807; SC_RUN_7712_5#81	UK	2011	gastroenteritis	human stool	464	ST-464 complex	ERR128807
18280	OXC6723	ERR128808; SC_RUN_7712_5#82	UK	2011	gastroenteritis	human stool	5819	ST-206 complex	ERR128808
18281	OXC6724	ERR128809; SC_RUN_7712_5#83	UK	2011	gastroenteritis	human stool	257	ST-257 complex	ERR128809
18283	OXC6726	ERR128811; SC_RUN_7712_5#85	UK	2011	gastroenteritis	human stool	51	ST-443 complex	ERR128811
18284	OXC6727	ERR128812; SC_RUN_7712_5#86	UK	2011	gastroenteritis	human stool	5811	ST-21 complex	ERR128812
18285	OXC6728	ERR128813; SC_RUN_7712_5#87	UK	2011	gastroenteritis	human stool	21	ST-21 complex	ERR128813
18286	OXC6729	ERR128814; SC_RUN_7712_5#88	UK	2011	gastroenteritis	human stool	1517	ST-354 complex	ERR128814
18287	OXC6730	ERR128815; SC_RUN_7712_5#89	UK	2011	gastroenteritis	human stool	21	ST-21 complex	ERR128815
18288	OXC6731	ERR128816; SC_RUN_7712_5#90	UK	2011	gastroenteritis	human stool	21	ST-21 complex	ERR128816
18289	OXC6732	ERR128817; SC_RUN_7712_5#91	UK	2011	gastroenteritis	human stool	5812	ST-464 complex	ERR128817
18290	OXC6733	ERR128818; SC_RUN_7712_5#92	UK	2011	gastroenteritis	human stool	5807		ERR128818
18291	OXC6734	ERR128819; SC_RUN_7712_5#93	UK	2011	gastroenteritis	human stool	21	ST-21 complex	ERR128819
18293	OXC6736	ERR128821; SC_RUN_7712_5#95	UK	2011	gastroenteritis	human stool	257	ST-257 complex	ERR128821
18294	OXC6737	ERR128822; SC_RUN_7712_5#96	UK	2011	gastroenteritis	human stool	52	ST-52 complex	ERR128822
18296	OXC6739	ERR137000; SC_RUN_7767_8#2	UK	2011	gastroenteritis	human stool	122	ST-206 complex	ERR137000
18297	OXC6740	ERR137001; SC_RUN_7767_8#3	UK	2011	gastroenteritis	human stool	403	ST-403 complex	ERR137001
18298	OXC6741	ERR137002; SC_RUN_7767_8#4	UK	2011	gastroenteritis	human stool	53	ST-21 complex	ERR137002
18299	OXC6742	ERR137003; SC_RUN_7767_8#5	UK	2011	gastroenteritis	human stool	52	ST-52 complex	ERR137003
18300	OXC6743	ERR137004; SC_RUN_7767_8#6	UK	2011	gastroenteritis	human stool	354	ST-354 complex	ERR137004
18302	OXC6745	ERR137006; SC_RUN_7767_8#8	UK	2011	gastroenteritis	human stool	21	ST-21 complex	ERR137006
18303	OXC6746	ERR137007; SC_RUN_7767_8#9	UK	2011	gastroenteritis	human stool	574	ST-574 complex	ERR137007
18304	OXC6747	ERR137008; SC_RUN_7767_8#10	UK	2011	gastroenteritis	human stool	990	ST-257 complex	ERR137008
18305	OXC6748	ERR137009; SC_RUN_7767_8#11	UK	2011	gastroenteritis	human stool	5136	ST-464 complex	ERR137009
18306	OXC6749	ERR137010; SC_RUN_7767_8#12	UK	2011	gastroenteritis	human stool	2030	ST-257 complex	ERR137010
18307	OXC6750	ERR137011; SC_RUN_7767_8#13	UK	2011	gastroenteritis	human stool	824	ST-257 complex	ERR137011
18308	OXC6751	ERR137012; SC_RUN_7767_8#14	UK	2011	gastroenteritis	human stool	2135	ST-21 complex	ERR137012
18309	OXC6752	ERR137013; SC_RUN_7767_8#15	UK	2011	gastroenteritis	human stool	2135	ST-21 complex	ERR137013
18310	OXC6753	ERR137014; SC_RUN_7767_8#16	UK	2011	gastroenteritis	human stool	354	ST-354 complex	ERR137014
18311	OXC6754	ERR137015; SC_RUN_7767_8#17	UK	2011	gastroenteritis	human stool	122	ST-206 complex	ERR137015
18312	OXC6755	ERR137016; SC_RUN_7767_8#18	UK	2011	gastroenteritis	human stool	22	ST-22 complex	ERR137016
18313	OXC6756	ERR137017; SC_RUN_7767_8#19	UK	2011	gastroenteritis	human stool	464	ST-464 complex	ERR137017
18314	OXC6757	ERR137018; SC_RUN_7767_8#20	UK	2011	gastroenteritis	human stool	5	ST-353 complex	ERR137018
18315	OXC6758	ERR137019; SC_RUN_7767_8#21	UK	2011	gastroenteritis	human stool	464	ST-464 complex	ERR137019
18316	OXC6759	ERR137020; SC_RUN_7767_8#22	UK	2011	gastroenteritis	human stool	51	ST-443 complex	ERR137020
18317	OXC6760	ERR137021; SC_RUN_7767_8#23	UK	2011	gastroenteritis	human stool	257	ST-257 complex	ERR137021
18320	OXC6763	ERR137024; SC_RUN_7767_8#26	UK	2011	gastroenteritis	human stool	50	ST-21 complex	ERR137024
18321	OXC6764	ERR137025; SC_RUN_7767_8#27	UK	2011	gastroenteritis	human stool	21	ST-21 complex	ERR137025
18323	OXC6766	ERR137027; SC_RUN_7767_8#29	UK	2011	gastroenteritis	human stool	262	ST-21 complex	ERR137027
18324	OXC6767	ERR137028; SC_RUN_7767_8#30	UK	2011	gastroenteritis	human stool	464	ST-464 complex	ERR137028
18325	OXC6768	ERR137029; SC_RUN_7767_8#31	UK	2011	gastroenteritis	human stool	2275	ST-52 complex	ERR137029
18326	OXC6769	ERR137030; SC_RUN_7767_8#32	UK	2011	gastroenteritis	human stool	61	ST-61 complex	ERR137030
18327	OXC6770	ERR137031; SC_RUN_7767_8#33	UK	2011	gastroenteritis	human stool	48	ST-48 complex	ERR137031
18328	OXC6771	ERR137032; SC_RUN_7767_8#34	UK	2011	gastroenteritis	human stool	270	ST-403 complex	ERR137032
18329	OXC6772	ERR137033; SC_RUN_7767_8#35	UK	2011	gastroenteritis	human stool	257	ST-257 complex	ERR137033
18330	OXC6773	ERR137034; SC_RUN_7767_8#36	UK	2011	gastroenteritis	human stool	508	ST-508 complex	ERR137034
18331	OXC6774	ERR137035; SC_RUN_7767_8#37	UK	2011	gastroenteritis	human stool	5136	ST-464 complex	ERR137035
18332	OXC6775	ERR137036; SC_RUN_7767_8#38	UK	2011	gastroenteritis	human stool	61	ST-61 complex	ERR137036
18333	OXC6776	ERR137037; SC_RUN_7767_8#39	UK	2011	gastroenteritis	human stool	5815	ST-353 complex	ERR137037
18334	OXC6777	ERR137038; SC_RUN_7767_8#40	UK	2011	gastroenteritis	human stool	1301	ST-692 complex	ERR137038
18335	OXC6778	ERR137039; SC_RUN_7767_8#41	UK	2011	gastroenteritis	human stool	464	ST-464 complex	ERR137039
18336	OXC6779	ERR137040; SC_RUN_7767_8#42	UK	2012	gastroenteritis	human stool	53	ST-21 complex	ERR137040
18337	OXC6780	ERR137041; SC_RUN_7767_8#43	UK	2012	gastroenteritis	human stool	464	ST-464 complex	ERR137041
18338	OXC6781	ERR137042; SC_RUN_7767_8#44	UK	2012	gastroenteritis	human stool	2135	ST-21 complex	ERR137042
18339	OXC6782	ERR137043; SC_RUN_7767_8#45	UK	2012	gastroenteritis	human stool	2135	ST-21 complex	ERR137043
18340	OXC6783	ERR137044; SC_RUN_7767_8#46	UK	2012	gastroenteritis	human stool	2030	ST-257 complex	ERR137044
18341	OXC6784	ERR137045; SC_RUN_7767_8#47	UK	2012	gastroenteritis	human stool	2030	ST-257 complex	ERR137045
18343	OXC6786	ERR137047; SC_RUN_7767_8#49	UK	2012	gastroenteritis	human stool	2135	ST-21 complex	ERR137047
18344	OXC6787	ERR137048; SC_RUN_7767_8#50	UK	2012	gastroenteritis	human stool	51	ST-443 complex	ERR137048
18345	OXC6788	ERR137049; SC_RUN_7767_8#51	UK	2012	gastroenteritis	human stool	573	ST-573 complex	ERR137049
18346	OXC6789	ERR137050; SC_RUN_7767_8#52	UK	2012	gastroenteritis	human stool	53	ST-21 complex	ERR137050
18347	OXC6790	ERR137051; SC_RUN_7767_8#53	UK	2012	gastroenteritis	human stool	574	ST-574 complex	ERR137051
18348	OXC6791	ERR137052; SC_RUN_7767_8#54	UK	2012	gastroenteritis	human stool	21	ST-21 complex	ERR137052
18349	OXC6792	ERR137053; SC_RUN_7767_8#55	UK	2012	gastroenteritis	human stool	2030	ST-257 complex	ERR137053
18350	OXC6793	ERR137054; SC_RUN_7767_8#56	UK	2012	gastroenteritis	human stool	572	ST-206 complex	ERR137054
18351	OXC6794	ERR137055; SC_RUN_7767_8#57	UK	2012	gastroenteritis	human stool	573	ST-573 complex	ERR137055
18352	OXC6795	ERR137056; SC_RUN_7767_8#58	UK	2012	gastroenteritis	human stool	814	ST-661 complex	ERR137056
18353	OXC6796	ERR137057; SC_RUN_7767_8#59	UK	2012	gastroenteritis	human stool	22	ST-22 complex	ERR137057
18354	OXC6797	ERR137058; SC_RUN_7767_8#60	UK	2012	gastroenteritis	human stool	45	ST-45 complex	ERR137058
18355	OXC6798	ERR137059; SC_RUN_7767_8#61	UK	2012	gastroenteritis	human stool	4526	ST-21 complex	ERR137059
18356	OXC6799	ERR137060; SC_RUN_7767_8#62	UK	2012	gastroenteritis	human stool	574	ST-574 complex	ERR137060
18357	OXC6800	ERR137061; SC_RUN_7767_8#63	UK	2012	gastroenteritis	human stool	2146	ST-464 complex	ERR137061
18358	OXC6801	ERR137062; SC_RUN_7767_8#64	UK	2012	gastroenteritis	human stool	354	ST-354 complex	ERR137062
18359	OXC6802	ERR137063; SC_RUN_7767_8#65	UK	2012	gastroenteritis	human stool	2863	ST-354 complex	ERR137063
18360	OXC6803	ERR137064; SC_RUN_7767_8#66	UK	2012	gastroenteritis	human stool	45	ST-45 complex	ERR137064
18361	OXC6804	ERR137065; SC_RUN_7767_8#67	UK	2012	gastroenteritis	human stool	21	ST-21 complex	ERR137065
18362	OXC6805	ERR137066; SC_RUN_7767_8#68	UK	2012	gastroenteritis	human stool	48	ST-48 complex	ERR137066
18363	OXC6806	ERR137067; SC_RUN_7767_8#69	UK	2012	gastroenteritis	human stool	5816	ST-353 complex	ERR137067
18364	OXC6807	ERR137068; SC_RUN_7767_8#70	UK	2012	gastroenteritis	human stool	464	ST-464 complex	ERR137068
18365	OXC6808	ERR137069; SC_RUN_7767_8#71	UK	2012	gastroenteritis	human stool	61	ST-61 complex	ERR137069
18366	OXC6809	ERR137070; SC_RUN_7767_8#72	UK	2012	gastroenteritis	human stool	574	ST-574 complex	ERR137070
18368	OXC6811	ERR137072; SC_RUN_7767_8#74	UK	2012	gastroenteritis	human stool	5817	ST-1034 complex	ERR137072
18369	OXC6812	ERR137073; SC_RUN_7767_8#75	UK	2012	gastroenteritis	human stool	21	ST-21 complex	ERR137073
18370	OXC6813	ERR137074; SC_RUN_7767_8#76	UK	2012	gastroenteritis	human stool	464	ST-464 complex	ERR137074
18371	OXC6814	ERR137075; SC_RUN_7767_8#77	UK	2012	gastroenteritis	human stool	356	ST-353 complex	ERR137075
18372	OXC6815	ERR137076; SC_RUN_7767_8#78	UK	2012	gastroenteritis	human stool	21	ST-21 complex	ERR137076
18373	OXC6816	ERR137077; SC_RUN_7767_8#79	UK	2012	gastroenteritis	human stool	257	ST-257 complex	ERR137077
18375	OXC6818	ERR137079; SC_RUN_7767_8#81	UK	2012	gastroenteritis	human stool	356	ST-353 complex	ERR137079
18376	OXC6819	ERR137080; SC_RUN_7767_8#82	UK	2012	gastroenteritis	human stool	583	ST-45 complex	ERR137080
18377	OXC6820	ERR137081; SC_RUN_7767_8#83	UK	2012	gastroenteritis	human stool	50	ST-21 complex	ERR137081
18378	OXC6821	ERR137082; SC_RUN_7767_8#84	UK	2012	gastroenteritis	human stool	574	ST-574 complex	ERR137082
18379	OXC6822	ERR137083; SC_RUN_7767_8#85	UK	2012	gastroenteritis	human stool	356	ST-353 complex	ERR137083
18380	OXC6823	ERR137084; SC_RUN_7767_8#86	UK	2012	gastroenteritis	human stool	883	ST-21 complex	ERR137084
18381	OXC6824	ERR137085; SC_RUN_7767_8#87	UK	2012	gastroenteritis	human stool	262	ST-21 complex	ERR137085
18383	OXC6826	ERR137087; SC_RUN_7767_8#89	UK	2012	gastroenteritis	human stool	267	ST-283 complex	ERR137087
18384	OXC6827	ERR137088; SC_RUN_7767_8#90	UK	2012	gastroenteritis	human stool	42	ST-42 complex	ERR137088
18385	OXC6828	ERR137089; SC_RUN_7767_8#91	UK	2012	gastroenteritis	human stool	464	ST-464 complex	ERR137089
18386	OXC6830	ERR137090; SC_RUN_7767_8#92	UK	2012	gastroenteritis	human stool	5818		ERR137090
18387	OXC6831	ERR137091; SC_RUN_7767_8#93	UK	2012	gastroenteritis	human stool	2274		ERR137091
18388	OXC6832	ERR137092; SC_RUN_7767_8#94	UK	2012	gastroenteritis	human stool	436		ERR137092
18389	OXC6833	ERR137093; SC_RUN_7767_8#95	UK	2012	gastroenteritis	human stool	104	ST-21 complex	ERR137093
18390	OXC6834	ERR137094; SC_RUN_7767_8#96	UK	2012	gastroenteritis	human stool	51	ST-443 complex	ERR137094
18429	OXC4719	ERR148341; SC_RUN_7875_7#56	UK	2009	gastroenteritis	human stool	2122	ST-353 complex	ERR148341
18430	OXC4721	ERR148342; SC_RUN_7875_7#57	UK	2009	gastroenteritis	human stool	137	ST-45 complex	ERR148342
18431	OXC4722	ERR148343; SC_RUN_7875_7#58	UK	2009	gastroenteritis	human stool	61	ST-61 complex	ERR148343
18432	OXC4724	ERR148344; SC_RUN_7875_7#59	UK	2009	gastroenteritis	human stool	2078	ST-206 complex	ERR148344
18433	OXC4726	ERR148345; SC_RUN_7875_7#60	UK	2009	gastroenteritis	human stool	53	ST-21 complex	ERR148345
18434	OXC4727	ERR148346; SC_RUN_7875_7#61	UK	2009	gastroenteritis	human stool	354	ST-354 complex	ERR148346
18435	OXC4728	ERR148347; SC_RUN_7875_7#62	UK	2009	gastroenteritis	human stool	362	ST-362 complex	ERR148347
18436	OXC4731	ERR148348; SC_RUN_7875_7#63	UK	2009	gastroenteritis	human stool	574	ST-574 complex	ERR148348
18437	OXC4734	ERR148349; SC_RUN_7875_7#64	UK	2009	gastroenteritis	human stool	48	ST-48 complex	ERR148349
18438	OXC4735	ERR148350; SC_RUN_7875_7#65	UK	2009	gastroenteritis	human stool	48	ST-48 complex	ERR148350
18439	OXC4736	ERR148351; SC_RUN_7875_7#66	UK	2009	gastroenteritis	human stool	1326	ST-45 complex	ERR148351
18440	OXC4737	ERR148352; SC_RUN_7875_7#67	UK	2009	gastroenteritis	human stool	1044	ST-658 complex	ERR148352
18441	OXC4738	ERR148353; SC_RUN_7875_7#68	UK	2009	gastroenteritis	human stool	2030	ST-257 complex	ERR148353
18442	OXC4740	ERR148354; SC_RUN_7875_7#69	UK	2009	gastroenteritis	human stool	257	ST-257 complex	ERR148354
18443	OXC4741	ERR148355; SC_RUN_7875_7#70	UK	2009	gastroenteritis	human stool	354	ST-354 complex	ERR148355
18444	OXC4742	ERR148356; SC_RUN_7875_7#71	UK	2009	gastroenteritis	human stool	574	ST-574 complex	ERR148356
18445	OXC4743	ERR148357; SC_RUN_7875_7#72	UK	2009	gastroenteritis	human stool	354	ST-354 complex	ERR148357
18446	OXC4744	ERR148358; SC_RUN_7875_7#73	UK	2009	gastroenteritis	human stool	2135	ST-21 complex	ERR148358
18447	OXC4745	ERR148359; SC_RUN_7875_7#74	UK	2009	gastroenteritis	human stool	917	ST-21 complex	ERR148359
18448	OXC4746	ERR148360; SC_RUN_7875_7#75	UK	2009	gastroenteritis	human stool	436		ERR148360
18449	OXC4747	ERR148361; SC_RUN_7875_7#76	UK	2009	gastroenteritis	human stool	572	ST-206 complex	ERR148361
18450	OXC4748	ERR148362; SC_RUN_7875_7#77	UK	2009	gastroenteritis	human stool	572	ST-206 complex	ERR148362
18451	OXC4749	ERR148363; SC_RUN_7875_7#78	UK	2009	gastroenteritis	human stool	2135	ST-21 complex	ERR148363
18453	OXC4754	ERR148365; SC_RUN_7875_7#80	UK	2009	gastroenteritis	human stool	53	ST-21 complex	ERR148365
18454	OXC4756	ERR148366; SC_RUN_7875_7#81	UK	2009	gastroenteritis	human stool	2078	ST-206 complex	ERR148366
18455	OXC4760	ERR148367; SC_RUN_7875_7#82	UK	2009	gastroenteritis	human stool	257	ST-257 complex	ERR148367
18456	OXC4762	ERR148368; SC_RUN_7875_7#83	UK	2009	gastroenteritis	human stool	2135	ST-21 complex	ERR148368
18457	OXC4763	ERR148369; SC_RUN_7875_7#84	UK	2009	gastroenteritis	human stool	464	ST-464 complex	ERR148369
18458	OXC4765	ERR148370; SC_RUN_7875_7#85	UK	2009	gastroenteritis	human stool	2135	ST-21 complex	ERR148370
18460	OXC4767	ERR148372; SC_RUN_7875_7#87	UK	2009	gastroenteritis	human stool	48	ST-48 complex	ERR148372
18461	OXC4768	ERR148373; SC_RUN_7875_7#88	UK	2009	gastroenteritis	human stool	42	ST-42 complex	ERR148373
18462	OXC4770	ERR148374; SC_RUN_7875_7#89	UK	2009	gastroenteritis	human stool	2135	ST-21 complex	ERR148374
18463	OXC4773	ERR148375; SC_RUN_7875_7#90	UK	2009	gastroenteritis	human stool	464	ST-464 complex	ERR148375
18464	OXC4774	ERR148376; SC_RUN_7875_7#91	UK	2009	gastroenteritis	human stool	257	ST-257 complex	ERR148376
18465	OXC4775	ERR148377; SC_RUN_7875_7#92	UK	2009	gastroenteritis	human stool	5	ST-353 complex	ERR148377
18466	OXC4776	ERR148378; SC_RUN_7875_7#93	UK	2009	gastroenteritis	human stool	50	ST-21 complex	ERR148378
18468	OXC4778	ERR148380; SC_RUN_7875_7#95	UK	2009	gastroenteritis	human stool	267	ST-283 complex	ERR148380
18469	OXC4779	ERR148381; SC_RUN_7875_7#96	UK	2009	gastroenteritis	human stool	48	ST-48 complex	ERR148381
21106	OXC6932	ERR189774; SC_RUN_8321_8#1	UK	2012	gastroenteritis	human stool	50	ST-21 complex	ERR189774
21108	OXC6934	ERR189776; SC_RUN_8321_8#3	UK	2012	gastroenteritis	human stool	2033	ST-354 complex	ERR189776
21109	OXC6935	ERR189777; SC_RUN_8321_8#4	UK	2012	gastroenteritis	human stool	5136	ST-464 complex	ERR189777
21110	OXC6936	ERR189778; SC_RUN_8321_8#5	UK	2012	gastroenteritis	human stool	61	ST-61 complex	ERR189778
21112	OXC6938	ERR189780; SC_RUN_8321_8#7	UK	2012	gastroenteritis	human stool	2109	ST-45 complex	ERR189780
21113	OXC6939	ERR189781; SC_RUN_8321_8#8	UK	2012	gastroenteritis	human stool	572	ST-206 complex	ERR189781
21114	OXC6940	ERR189782; SC_RUN_8321_8#9	UK	2012	gastroenteritis	human stool	5136	ST-464 complex	ERR189782
21115	OXC6941	ERR189783; SC_RUN_8321_8#10	UK	2012	gastroenteritis	human stool	53	ST-21 complex	ERR189783
21116	OXC6942	ERR189784; SC_RUN_8321_8#11	UK	2012	gastroenteritis	human stool	429	ST-48 complex	ERR189784
21117	OXC6943	ERR189785; SC_RUN_8321_8#12	UK	2012	gastroenteritis	human stool	464	ST-464 complex	ERR189785
21118	OXC6944	ERR189786; SC_RUN_8321_8#13	UK	2012	gastroenteritis	human stool	986		ERR189786
21119	OXC6945	ERR189787; SC_RUN_8321_8#14	UK	2012	gastroenteritis	human stool	21	ST-21 complex	ERR189787
21120	OXC6946	ERR189788; SC_RUN_8321_8#15	UK	2012	gastroenteritis	human stool	50	ST-21 complex	ERR189788
21121	OXC6947	ERR189789; SC_RUN_8321_8#16	UK	2012	gastroenteritis	human stool	206	ST-206 complex	ERR189789
21122	OXC6948	ERR189790; SC_RUN_8321_8#17	UK	2012	gastroenteritis	human stool	21	ST-21 complex	ERR189790
21123	OXC6949	ERR189791; SC_RUN_8321_8#18	UK	2012	gastroenteritis	human stool	50	ST-21 complex	ERR189791
21124	OXC6950	ERR189792; SC_RUN_8321_8#19	UK	2012	gastroenteritis	human stool	122	ST-206 complex	ERR189792
21125	OXC6951	ERR189793; SC_RUN_8321_8#20	UK	2012	gastroenteritis	human stool	51	ST-443 complex	ERR189793
21126	OXC6952	ERR189794; SC_RUN_8321_8#21	UK	2012	gastroenteritis	human stool	51	ST-443 complex	ERR189794
21127	OXC6953	ERR189795; SC_RUN_8321_8#22	UK	2012	gastroenteritis	human stool	21	ST-21 complex	ERR189795
21128	OXC6954	ERR189796; SC_RUN_8321_8#23	UK	2012	gastroenteritis	human stool	2850	ST-446 complex	ERR189796
21129	OXC6955	ERR189797; SC_RUN_8321_8#24	UK	2012	gastroenteritis	human stool	5136	ST-464 complex	ERR189797
21130	OXC6956	ERR189798; SC_RUN_8321_8#25	UK	2012	gastroenteritis	human stool	50	ST-21 complex	ERR189798
21131	OXC6957	ERR189799; SC_RUN_8321_8#26	UK	2012	gastroenteritis	human stool	574	ST-574 complex	ERR189799
21132	OXC6958	ERR189800; SC_RUN_8321_8#27	UK	2012	gastroenteritis	human stool	5136	ST-464 complex	ERR189800
21133	OXC6959	ERR189801; SC_RUN_8321_8#28	UK	2012	gastroenteritis	human stool	5727	ST-21 complex	ERR189801
21134	OXC6960	ERR189802; SC_RUN_8321_8#29	UK	2012	gastroenteritis	human stool	4056	ST-607 complex	ERR189802
21135	OXC6961	ERR189803; SC_RUN_8321_8#30	UK	2012	gastroenteritis	human stool	21	ST-21 complex	ERR189803
21137	OXC6963	ERR189805; SC_RUN_8321_8#32	UK	2012	gastroenteritis	human stool	5794	ST-443 complex	ERR189805
21138	OXC6964	ERR189806; SC_RUN_8321_8#33	UK	2012	gastroenteritis	human stool	50	ST-21 complex	ERR189806
21139	OXC6965	ERR189807; SC_RUN_8321_8#34	UK	2012	gastroenteritis	human stool	573	ST-573 complex	ERR189807
21140	OXC6966	ERR189808; SC_RUN_8321_8#35	UK	2012	gastroenteritis	human stool	22	ST-22 complex	ERR189808
21141	OXC6967	ERR189809; SC_RUN_8321_8#36	UK	2012	gastroenteritis	human stool	257	ST-257 complex	ERR189809
21142	OXC6968	ERR189810; SC_RUN_8321_8#37	UK	2012	gastroenteritis	human stool	5	ST-353 complex	ERR189810
21143	OXC6969	ERR189811; SC_RUN_8321_8#38	UK	2012	gastroenteritis	human stool	5136	ST-464 complex	ERR189811
21144	OXC6970	ERR189812; SC_RUN_8321_8#39	UK	2012	gastroenteritis	human stool	583	ST-45 complex	ERR189812
21145	OXC6971	ERR189813; SC_RUN_8321_8#40	UK	2012	gastroenteritis	human stool	5136	ST-464 complex	ERR189813
21146	OXC6973	ERR189814; SC_RUN_8321_8#41	UK	2012	gastroenteritis	human stool	48	ST-48 complex	ERR189814
21147	OXC6974	ERR189815; SC_RUN_8321_8#42	UK	2012	gastroenteritis	human stool	257	ST-257 complex	ERR189815
21148	OXC6975	ERR189816; SC_RUN_8321_8#43	UK	2012	gastroenteritis	human stool	257	ST-257 complex	ERR189816
21149	OXC6976	ERR189817; SC_RUN_8321_8#44	UK	2012	gastroenteritis	human stool	574	ST-574 complex	ERR189817
21150	OXC6977	ERR189818; SC_RUN_8321_8#45	UK	2012	gastroenteritis	human stool	5	ST-353 complex	ERR189818
21151	OXC6978	ERR189819; SC_RUN_8321_8#46	UK	2012	gastroenteritis	human stool	61	ST-61 complex	ERR189819
21152	OXC6979	ERR189820; SC_RUN_8321_8#47	UK	2012	gastroenteritis	human stool	21	ST-21 complex	ERR189820
21153	OXC6980	ERR189821; SC_RUN_8321_8#48	UK	2012	gastroenteritis	human stool	5136	ST-464 complex	ERR189821
21154	OXC6981	ERR189822; SC_RUN_8321_8#49	UK	2012	gastroenteritis	human stool	44	ST-21 complex	ERR189822
21155	OXC6982	ERR189823; SC_RUN_8321_8#50	UK	2012	gastroenteritis	human stool	257	ST-257 complex	ERR189823
21156	OXC6983	ERR189824; SC_RUN_8321_8#51	UK	2012	gastroenteritis	human stool	48	ST-48 complex	ERR189824

## Sheet: N_meningitidis
Datasets S1 (N. meningitidis): Genomes included in the study dataset, with available metadata and genome sequence accession numbers.
BIGS id	Strain	Aliases	Country	Year	Disease	Source	Serogroup	ST	CC	Accession Number
237	H44/76	44/76-3; Z3842	Norway	1976	invasive (unspecified/other)		B	32	ST-32 complex/ET-5 complex	PRJNA162083
240	MC58	Z7176	UK	1983			B	74	ST-32 complex/ET-5 complex	PRJNA57817
613	Z2491	C751; Z6244	Gambia	1983	meningitis	CSF	A	4	ST-4 complex/subgroup IV	PRJNA57819
638	G2136	Z6411	UK	1986	invasive (unspecified/other)		B	8	ST-8 complex/Cluster A4	PRJNA162085
18968	M10 240474		UK	2010	invasive (unspecified/other)		B	269	ST-269 complex	ERR086224
18969	M10 240478		UK	2010	invasive (unspecified/other)		B	1194	ST-41/44 complex/Lineage 3	ERR086225
19023	M10 240473		UK	2010	invasive (unspecified/other)		B	1161	ST-269 complex	ERR086223
19024	M10 240480		UK	2010	invasive (unspecified/other)		B	1194	ST-41/44 complex/Lineage 3	ERR086226
19025	M10 240481		UK	2010	invasive (unspecified/other)		B	1831		ERR086227
19026	M10 240482		UK	2010	invasive (unspecified/other)		B	3754	ST-41/44 complex/Lineage 3	ERR086228
19027	M10 240484		UK	2010	invasive (unspecified/other)		B	1097	ST-41/44 complex/Lineage 3	ERR086229
19028	M10 240485		UK	2010	invasive (unspecified/other)		B	275	ST-269 complex	ERR086230
19029	M10 240487		UK	2010	invasive (unspecified/other)		B	1049	ST-269 complex	ERR086231
19030	M10 240489		UK	2010	invasive (unspecified/other)		B	461	ST-461 complex	ERR086232
19031	M10 240490		UK	2010	invasive (unspecified/other)		B	1161	ST-269 complex	ERR086233
19032	M10 240498		UK	2010	invasive (unspecified/other)		B	41	ST-41/44 complex/Lineage 3	ERR086234
19958	M10 240476		UK	2010	invasive (unspecified/other)		B	9812	ST-213 complex	ERR172588
19959	M10 240499		UK	2010	invasive (unspecified/other)		B	275	ST-269 complex	ERR172584
19960	M10 240500		UK	2010	invasive (unspecified/other)		B	41	ST-41/44 complex/Lineage 3	ERR172585
19961	M10 240502		UK	2010	invasive (unspecified/other)		B	340	ST-41/44 complex/Lineage 3	ERR172586
19962	M10 240503		UK	2010	invasive (unspecified/other)		Y	23	ST-23 complex/Cluster A3	ERR172587
19963	M10 240505		UK	2010	invasive (unspecified/other)		Y	1655	ST-23 complex/Cluster A3	ERR170934
19964	M10 240507		UK	2010	invasive (unspecified/other)		Y	183	ST-23 complex/Cluster A3	ERR170935
19965	M10 240508		UK	2010	invasive (unspecified/other)		B	1575		ERR170936
19966	M10 240511		UK	2010	invasive (unspecified/other)		B	4713		ERR170937
19967	M10 240512		UK	2010	invasive (unspecified/other)		B	41	ST-41/44 complex/Lineage 3	ERR170938
19968	M10 240514		UK	2010	invasive (unspecified/other)		W-135	11	ST-11 complex/ET-37 complex	ERR170939
19969	M10 240515		UK	2010	invasive (unspecified/other)		B	269	ST-269 complex	ERR170940
19970	M10 240520		UK	2010	invasive (unspecified/other)		Y	1655	ST-23 complex/Cluster A3	ERR170941
19971	M10 240521		UK	2010	invasive (unspecified/other)		B	3802	ST-41/44 complex/Lineage 3	ERR170942
19972	M10 240522		UK	2010	invasive (unspecified/other)		B	41	ST-41/44 complex/Lineage 3	ERR170943
19973	M10 240525		UK	2010	invasive (unspecified/other)		B	2931	ST-32 complex/ET-5 complex	ERR170944
19974	M10 240527		UK	2010	invasive (unspecified/other)		B	269	ST-269 complex	ERR170945
19975	M10 240528		UK	2010	invasive (unspecified/other)		B	7833	ST-269 complex	ERR170946
19976	M10 240530		UK	2010	invasive (unspecified/other)		Y	9813	ST-23 complex/Cluster A3	ERR170947
19977	M10 240531		UK	2010	invasive (unspecified/other)		Y	1655	ST-23 complex/Cluster A3	ERR170948
19978	M10 240532		UK	2010	invasive (unspecified/other)		B	41	ST-41/44 complex/Lineage 3	ERR170949
19979	M10 240534		UK	2010	invasive (unspecified/other)		Y	1655	ST-23 complex/Cluster A3	ERR170950
19980	M10 240536		UK	2010	invasive (unspecified/other)		Y	1655	ST-23 complex/Cluster A3	ERR170951
19981	M10 240540		UK	2010	invasive (unspecified/other)		Y	9814	ST-23 complex/Cluster A3	ERR170952
19982	M10 240546		UK	2010	invasive (unspecified/other)		B	213	ST-213 complex	ERR170953
19983	M10 240547		UK	2010	invasive (unspecified/other)		B	749	ST-32 complex/ET-5 complex	ERR170954
19984	M10 240548		UK	2010	invasive (unspecified/other)		B	340	ST-41/44 complex/Lineage 3	ERR170955
19985	M10 240549		UK	2010	invasive (unspecified/other)		B	41	ST-41/44 complex/Lineage 3	ERR170956
19986	M10 240550		UK	2010	invasive (unspecified/other)		B	1163	ST-269 complex	ERR170957
19987	M10 240553		UK	2010	invasive (unspecified/other)		B	1161	ST-269 complex	ERR170958
19988	M10 240556		UK	2010	invasive (unspecified/other)		B	9815	ST-41/44 complex/Lineage 3	ERR170959
19989	M10 240558		UK	2010	invasive (unspecified/other)		B	1992	ST-41/44 complex/Lineage 3	ERR170960
19990	M10 240559		UK	2010	invasive (unspecified/other)		B	162	ST-162 complex	ERR170961
19991	M10 240566		UK	2010	invasive (unspecified/other)		B	213	ST-213 complex	ERR170962
19992	M10 240568		UK	2010	invasive (unspecified/other)		B	213	ST-213 complex	ERR170963
19993	M10 240569		UK	2010	invasive (unspecified/other)		B	18	ST-18 complex	ERR170964
19994	M10 240570		UK	2010	invasive (unspecified/other)		B	5357	ST-41/44 complex/Lineage 3	ERR170965
19995	M10 240572		UK	2010	invasive (unspecified/other)		B	1161	ST-269 complex	ERR170966
19996	M10 240578		UK	2010	invasive (unspecified/other)		B	34	ST-32 complex/ET-5 complex	ERR170967
19997	M10 240579		UK	2010	invasive (unspecified/other)		B	3687		ERR170968
19998	M10 240580		UK	2010	invasive (unspecified/other)		Y	1655	ST-23 complex/Cluster A3	ERR170969
19999	M10 240581		UK	2010	invasive (unspecified/other)		NG	1136	ST-1136 complex	ERR170970
20000	M10 240582		UK	2010	invasive (unspecified/other)		B	34	ST-32 complex/ET-5 complex	ERR170971
20001	M10 240583		UK	2010	invasive (unspecified/other)		B	9816		ERR170972
20002	M10 240585		UK	2010	invasive (unspecified/other)		B	46	ST-41/44 complex/Lineage 3	ERR170973
20003	M10 240586		UK	2010	invasive (unspecified/other)		B	485	ST-41/44 complex/Lineage 3	ERR170974
20004	M10 240587		UK	2010	invasive (unspecified/other)		B	9879	ST-41/44 complex/Lineage 3	ERR170975
20005	M10 240589		UK	2010	invasive (unspecified/other)		B	40	ST-41/44 complex/Lineage 3	ERR170976
20006	M10 240590		UK	2010	invasive (unspecified/other)		Y	23	ST-23 complex/Cluster A3	ERR170977
20007	M10 240591		UK	2010	invasive (unspecified/other)		B	461	ST-461 complex	ERR170978
20008	M10 240592		UK	2010	invasive (unspecified/other)		B	6782	ST-41/44 complex/Lineage 3	ERR170979
20009	M10 240595		UK	2010	invasive (unspecified/other)		B	213	ST-213 complex	ERR170980
20010	M10 240597		UK	2010	invasive (unspecified/other)		B	41	ST-41/44 complex/Lineage 3	ERR170981
20011	M10 240598		UK	2010	invasive (unspecified/other)		B	41	ST-41/44 complex/Lineage 3	ERR170982
20012	M10 240602		UK	2010	invasive (unspecified/other)		B	1161	ST-269 complex	ERR170983
20013	M10 240604		UK	2010	invasive (unspecified/other)		B	8384	ST-41/44 complex/Lineage 3	ERR170984
20014	M10 240605		UK	2010	invasive (unspecified/other)		B	41	ST-41/44 complex/Lineage 3	ERR170985
20015	M10 240606		UK	2010	invasive (unspecified/other)		B	213	ST-213 complex	ERR170986
20016	M10 240607		UK	2010	invasive (unspecified/other)		C	5133	ST-103 complex	ERR170987
20017	M10 240611		UK	2010	invasive (unspecified/other)		B	749	ST-32 complex/ET-5 complex	ERR170988
20018	M10 240612		UK	2010	invasive (unspecified/other)		B	269	ST-269 complex	ERR170989
20019	M10 240613		UK	2010	invasive (unspecified/other)		B	1161	ST-269 complex	ERR170990
20020	M10 240614		UK	2010	invasive (unspecified/other)		B	9817		ERR170991
20021	M10 240616		UK	2010	invasive (unspecified/other)		W-135	1224	ST-22 complex	ERR170992
20022	M10 240617		UK	2010	invasive (unspecified/other)		B	213	ST-213 complex	ERR170993
20023	M10 240618		UK	2010	invasive (unspecified/other)		29E	2435	ST-60 complex	ERR176024
20024	M10 240619		UK	2010	invasive (unspecified/other)		B	213	ST-213 complex	ERR170994
20025	M10 240621		UK	2010	invasive (unspecified/other)		B	213	ST-213 complex	ERR170995
20026	M10 240622		UK	2010	invasive (unspecified/other)		B	9880		ERR170996
20027	M10 240623		UK	2010	invasive (unspecified/other)		B	1161	ST-269 complex	ERR170997
20028	M10 240624		UK	2010	invasive (unspecified/other)		B	275	ST-269 complex	ERR170998
20029	M10 240626		UK	2010	invasive (unspecified/other)		B	4401	ST-269 complex	ERR170999
20030	M10 240627		UK	2010	invasive (unspecified/other)		B	6083	ST-32 complex/ET-5 complex	ERR171000
20031	M10 240631		UK	2010	invasive (unspecified/other)		C	467	ST-269 complex	ERR171001
20032	M10 240632		UK	2010	invasive (unspecified/other)		Y	1655	ST-23 complex/Cluster A3	ERR171002
20033	M10 240633		UK	2010	invasive (unspecified/other)		Y	1655	ST-23 complex/Cluster A3	ERR171003
20034	M10 240634		UK	2010	invasive (unspecified/other)		B	42	ST-41/44 complex/Lineage 3	ERR171004
20035	M10 240636		UK	2010	invasive (unspecified/other)		B	1157	ST-1157 complex	ERR171005
20036	M10 240638		UK	2010	invasive (unspecified/other)		B	275	ST-269 complex	ERR171006
20037	M10 240639		UK	2010	invasive (unspecified/other)		B	284		ERR171007
20038	M10 240640		UK	2010	invasive (unspecified/other)		B	1831		ERR171008
20039	M10 240641		UK	2010	invasive (unspecified/other)		W-135	184	ST-22 complex	ERR171009
20040	M10 240642		UK	2010	invasive (unspecified/other)		B	5335		ERR171010
20041	M10 240643		UK	2010	invasive (unspecified/other)		Y	23	ST-23 complex/Cluster A3	ERR171011
20042	M10 240644		UK	2010	invasive (unspecified/other)		Y	3651	ST-22 complex	ERR171012
20043	M10 240645		UK		invasive (unspecified/other)			283	ST-269 complex	ERR171013
20044	M10 240649		UK	2010	invasive (unspecified/other)		B	275	ST-269 complex	ERR171014
20045	M10 240650		UK	2010	invasive (unspecified/other)		B	2123		ERR171015
20046	M10 240651		UK	2010	invasive (unspecified/other)		B	9881	ST-213 complex	ERR171016
20047	M10 240652		UK	2010	invasive (unspecified/other)		B	275	ST-269 complex	ERR171017
20048	M10 240657		UK	2010	invasive (unspecified/other)		B	35	ST-35 complex	ERR171018
20049	M10 240659		UK	2010	invasive (unspecified/other)		B	41	ST-41/44 complex/Lineage 3	ERR171019
20050	M10 240661		UK	2010	invasive (unspecified/other)		B	1161	ST-269 complex	ERR171020
20051	M10 240662		UK	2010	invasive (unspecified/other)		B	9882	ST-41/44 complex/Lineage 3	ERR171021
20052	M10 240665		UK	2010	invasive (unspecified/other)		B	213	ST-213 complex	ERR171022
20053	M10 240666		UK	2010	invasive (unspecified/other)		W-135	1466	ST-174 complex	ERR171023
20054	M10 240668		UK	2010	invasive (unspecified/other)		X	9839		ERR171024
20055	M10 240669		UK	2010	invasive (unspecified/other)		B	1992	ST-41/44 complex/Lineage 3	ERR171025
20056	M10 240670		UK	2010	invasive (unspecified/other)		B	269	ST-269 complex	ERR171026
20057	M10 240671		UK	2010	invasive (unspecified/other)		W-135	11	ST-11 complex/ET-37 complex	ERR171027
20058	M10 240674		UK	2010	invasive (unspecified/other)		B	41	ST-41/44 complex/Lineage 3	ERR171028
20059	M10 240675		UK	2010	invasive (unspecified/other)		Y	168	ST-167 complex	ERR171029
20060	M10 240676		UK	2010	invasive (unspecified/other)		B	9828		ERR171030
20061	M10 240677		UK	2010	invasive (unspecified/other)		B	1575		ERR171031
20062	M10 240678		UK	2010	invasive (unspecified/other)		B	340	ST-41/44 complex/Lineage 3	ERR171032
20063	M10 240681		UK	2010	invasive (unspecified/other)		B	9883	ST-41/44 complex/Lineage 3	ERR171033
20064	M10 240682		UK	2010	invasive (unspecified/other)		B	269	ST-269 complex	ERR171034
20065	M10 240683		UK	2010	invasive (unspecified/other)		B	18	ST-18 complex	ERR171035
20066	M10 240684		UK	2010	invasive (unspecified/other)		B	11	ST-11 complex/ET-37 complex	ERR171036
20067	M10 240685		UK	2010	invasive (unspecified/other)		Y	1655	ST-23 complex/Cluster A3	ERR171037
20068	M10 240687		UK	2010	invasive (unspecified/other)		B	60	ST-60 complex	ERR171038
20069	M10 240689		UK	2010	invasive (unspecified/other)		B	154	ST-41/44 complex/Lineage 3	ERR171039
20070	M10 240690		UK	2010	invasive (unspecified/other)		B	1090	ST-41/44 complex/Lineage 3	ERR171040
20071	M10 240693		UK	2010	invasive (unspecified/other)		B	1430	ST-60 complex	ERR171041
20072	M10 240694		UK	2010	invasive (unspecified/other)		Y	1466	ST-174 complex	ERR171042
20073	M10 240698		UK	2010	invasive (unspecified/other)		B	282	ST-282 complex	ERR171043
20074	M10 240700		UK	2010	invasive (unspecified/other)		Y	6463	ST-23 complex/Cluster A3	ERR171044
20075	M10 240701		UK	2010	invasive (unspecified/other)		B	213	ST-213 complex	ERR171045
20076	M10 240702		UK	2010	invasive (unspecified/other)		B	154	ST-41/44 complex/Lineage 3	ERR171046
20077	M10 240703		UK	2010	invasive (unspecified/other)		B	9884	ST-213 complex	ERR171047
20078	M10 240704		UK	2010	invasive (unspecified/other)		B	269	ST-269 complex	ERR171048
20079	M10 240705		UK	2010	invasive (unspecified/other)		C	5133	ST-103 complex	ERR171049
20080	M10 240707		UK	2010	invasive (unspecified/other)		B	1194	ST-41/44 complex/Lineage 3	ERR171050
20081	M10 240708		UK	2010	invasive (unspecified/other)		B	1195	ST-269 complex	ERR171051
20082	M10 240709		UK	2010	invasive (unspecified/other)		B	479	ST-269 complex	ERR171052
20083	M10 240711		UK	2010	invasive (unspecified/other)		B	275	ST-269 complex	ERR171053
20084	M10 240712		UK	2010	invasive (unspecified/other)		B	213	ST-213 complex	ERR171054
20085	M10 240713		UK	2010	invasive (unspecified/other)		B	9829	ST-269 complex	ERR171055
20086	M10 240716		UK	2010	invasive (unspecified/other)		B	461	ST-461 complex	ERR171056
20087	M10 240717		UK	2010	invasive (unspecified/other)		B	9830	ST-213 complex	ERR171057
20088	M10 240718		UK	2010	invasive (unspecified/other)		B	9885	ST-60 complex	ERR171058
20089	M10 240719		UK	2010	invasive (unspecified/other)		B	34	ST-32 complex/ET-5 complex	ERR171059
20090	M10 240720		UK	2010	invasive (unspecified/other)		B	479	ST-269 complex	ERR171060
20091	M10 240721		UK	2010	invasive (unspecified/other)		B	318	ST-41/44 complex/Lineage 3	ERR171061
20092	M10 240722		UK	2010	invasive (unspecified/other)		B	41	ST-41/44 complex/Lineage 3	ERR171062
20093	M10 240723		UK	2010	invasive (unspecified/other)		B	41	ST-41/44 complex/Lineage 3	ERR171063
20094	M10 240724		UK	2010	invasive (unspecified/other)		B	1194	ST-41/44 complex/Lineage 3	ERR171064
20095	M10 240728		UK	2010	invasive (unspecified/other)		B	9840	ST-269 complex	ERR171065
20096	M10 240729		UK	2010	invasive (unspecified/other)		B	1049	ST-269 complex	ERR171066
20097	M10 240730		UK	2010	invasive (unspecified/other)		B	9886	ST-41/44 complex/Lineage 3	ERR171067
20098	M10 240731		UK	2010	invasive (unspecified/other)		B	9887		ERR171068
20099	M10 240732		UK	2010	invasive (unspecified/other)		Y	23	ST-23 complex/Cluster A3	ERR171069
20100	M10 240733		UK	2010	invasive (unspecified/other)		B	3934		ERR171070
20101	M10 240737		UK	2010	invasive (unspecified/other)		W-135	1281	ST-22 complex	ERR171071
20102	M10 240742		UK	2010	invasive (unspecified/other)		B	8955	ST-213 complex	ERR171072
20103	M10 240743		UK	2010	invasive (unspecified/other)		B	269	ST-269 complex	ERR171073
20104	M10 240745		UK	2010	invasive (unspecified/other)		Y	1655	ST-23 complex/Cluster A3	ERR171074
20105	M10 240746		UK	2010	invasive (unspecified/other)		B	9841	ST-41/44 complex/Lineage 3	ERR171075
20106	M10 240747		UK	2010	invasive (unspecified/other)		B	1097	ST-41/44 complex/Lineage 3	ERR176025
20107	M10 240748		UK	2010	invasive (unspecified/other)		B	485	ST-41/44 complex/Lineage 3	ERR176026
20108	M10 240749		UK	2010	invasive (unspecified/other)		B	485	ST-41/44 complex/Lineage 3	ERR171076
20109	M10 240750		UK	2010	invasive (unspecified/other)		B	8203	ST-41/44 complex/Lineage 3	ERR171077
20110	M10 240751		UK	2010	invasive (unspecified/other)		B	213	ST-213 complex	ERR171078
20111	M10 240752		UK	2010	invasive (unspecified/other)		B	1161	ST-269 complex	ERR171079
20112	M10 240753		UK	2010	invasive (unspecified/other)		B	34	ST-32 complex/ET-5 complex	ERR171080
20113	M10 240754		UK	2010	invasive (unspecified/other)		B	46	ST-41/44 complex/Lineage 3	ERR171081
20114	M10 240756		UK	2010	invasive (unspecified/other)		W-135	2114	ST-22 complex	ERR171082
20115	M10 240759		UK	2010	invasive (unspecified/other)		Y	1466	ST-174 complex	ERR171083
20116	M10 240761		UK	2010	invasive (unspecified/other)		B	1938	ST-41/44 complex/Lineage 3	ERR171084
20117	M10 240762		UK	2010	invasive (unspecified/other)		B	41	ST-41/44 complex/Lineage 3	ERR171085
20118	M10 240763		UK	2010	invasive (unspecified/other)		B	4051		ERR171086
20119	M10 240766		UK	2010	invasive (unspecified/other)		B	479	ST-269 complex	ERR171087
20120	M10 240767		UK	2010	invasive (unspecified/other)		B	34	ST-32 complex/ET-5 complex	ERR171088
20121	M10 240768		UK	2010	invasive (unspecified/other)		B	2873	ST-269 complex	ERR171089
20122	M10 240770		UK	2010	invasive (unspecified/other)		B	1195	ST-269 complex	ERR171090
20123	M10 240771		UK	2010	invasive (unspecified/other)		B	8068	ST-282 complex	ERR171091
20124	M10 240772		UK	2010	invasive (unspecified/other)		B	1161	ST-269 complex	ERR171092
20125	M10 240773		UK	2010	invasive (unspecified/other)		B	9841	ST-41/44 complex/Lineage 3	ERR171093
20126	M10 240774		UK	2010	invasive (unspecified/other)		B	1161	ST-269 complex	ERR171094
20127	M10 240775		UK	2010	invasive (unspecified/other)		B	41	ST-41/44 complex/Lineage 3	ERR171095
20128	M10 240776		UK	2010	invasive (unspecified/other)		Y	1655	ST-23 complex/Cluster A3	ERR171096
20129	M10 240777		UK	2010	invasive (unspecified/other)		Y	23	ST-23 complex/Cluster A3	ERR171097
20130	M10 240778		UK	2010	invasive (unspecified/other)		B	9187	ST-213 complex	ERR171098
20131	M10 240779		UK	2010	invasive (unspecified/other)		B	269	ST-269 complex	ERR171099
20132	M10 240781		UK	2010	invasive (unspecified/other)		Y	3651	ST-22 complex	ERR171100
20133	M10 240783		UK	2010	invasive (unspecified/other)		B	1161	ST-269 complex	ERR176027
20134	M10 240785		UK	2010	invasive (unspecified/other)		B	3447	ST-41/44 complex/Lineage 3	ERR171101
20135	M10 240786		UK	2010	invasive (unspecified/other)		Y	9831	ST-23 complex/Cluster A3	ERR171102
20136	M10 240787		UK	2010	invasive (unspecified/other)		Y	1655	ST-23 complex/Cluster A3	ERR171103
20137	M10 240788		UK	2010	invasive (unspecified/other)		B	5981	ST-41/44 complex/Lineage 3	ERR171104
20138	M10 240789		UK	2010	invasive (unspecified/other)		B	283	ST-269 complex	ERR171105
20139	M10 240790		UK	2010	invasive (unspecified/other)		B	259	ST-32 complex/ET-5 complex	ERR171106
20140	M10 240793		UK	2010	invasive (unspecified/other)		B	6782	ST-41/44 complex/Lineage 3	ERR171107
20141	M10 240794		UK	2010	invasive (unspecified/other)		B	32	ST-32 complex/ET-5 complex	ERR171108
20142	M10 240796		UK	2010	invasive (unspecified/other)		B	136	ST-41/44 complex/Lineage 3	ERR171109
20143	M10 240798		UK	2010	invasive (unspecified/other)		Y	1655	ST-23 complex/Cluster A3	ERR171110
20144	M10 240799		UK	2010	invasive (unspecified/other)		B	213	ST-213 complex	ERR171111
20145	M10 240803		UK	2010	invasive (unspecified/other)		B	1194	ST-41/44 complex/Lineage 3	ERR171112
20146	M10 240804		UK	2010	invasive (unspecified/other)		Y	1655	ST-23 complex/Cluster A3	ERR171113
20147	M10 240805		UK	2010	invasive (unspecified/other)		B	4713		ERR171114
20148	M10 240807		UK	2010	invasive (unspecified/other)		B	41	ST-41/44 complex/Lineage 3	ERR171115
20149	M10 240808		UK	2010	invasive (unspecified/other)		B	1092	ST-269 complex	ERR171116
20150	M10 240809		UK	2010	invasive (unspecified/other)		B	41	ST-41/44 complex/Lineage 3	ERR171117
20151	M10 240810		UK	2010	invasive (unspecified/other)		B	162	ST-162 complex	ERR171118
20152	M10 240811		UK	2010	invasive (unspecified/other)		B	9888	ST-1157 complex	ERR171119
20153	M10 240814		UK	2010	invasive (unspecified/other)		B	1161	ST-269 complex	ERR171120
20154	M10 240817		UK	2010	invasive (unspecified/other)		W-135	11	ST-11 complex/ET-37 complex	ERR171121
20155	M10 240818		UK	2010	invasive (unspecified/other)		C	11	ST-11 complex/ET-37 complex	ERR170738
20156	M10 240819		UK	2010	invasive (unspecified/other)		B	1163	ST-269 complex	ERR170739
20157	M10 240820		UK	2010	invasive (unspecified/other)		B	41	ST-41/44 complex/Lineage 3	ERR170740
20158	M10 240821		UK	2010	invasive (unspecified/other)		W-135	11	ST-11 complex/ET-37 complex	ERR170741
20159	M10 240822		UK	2010	invasive (unspecified/other)		W-135	1224	ST-22 complex	ERR170742
20160	M10 240823		UK	2010	invasive (unspecified/other)		B	1097	ST-41/44 complex/Lineage 3	ERR170743
20161	M10 240824		UK	2010	invasive (unspecified/other)		B	32	ST-32 complex/ET-5 complex	ERR170744
20162	M10 240825		UK	2010	invasive (unspecified/other)		B	9818	ST-60 complex	ERR170745
20163	M10 240826		UK	2010	invasive (unspecified/other)		B	7789	ST-269 complex	ERR170746
20164	M11 240000		UK	2011	invasive (unspecified/other)		Y	23	ST-23 complex/Cluster A3	ERR170747
20165	M11 240001		UK	2011	invasive (unspecified/other)		B	1946	ST-461 complex	ERR170748
20166	M11 240002		UK	2011	invasive (unspecified/other)		B	4954		ERR170749
20167	M11 240003		UK	2011	invasive (unspecified/other)		B	9889	ST-41/44 complex/Lineage 3	ERR176028
20168	M11 240004		UK	2011	invasive (unspecified/other)		B	1161	ST-269 complex	ERR170750
20169	M11 240005		UK	2011	invasive (unspecified/other)		Y	23	ST-23 complex/Cluster A3	ERR170751
20170	M11 240006		UK	2011	invasive (unspecified/other)		B	8049	ST-32 complex/ET-5 complex	ERR170752
20171	M11 240007		UK	2011	invasive (unspecified/other)		Y	1655	ST-23 complex/Cluster A3	ERR170753
20172	M11 240008		UK	2011	invasive (unspecified/other)		B	2783	ST-41/44 complex/Lineage 3	ERR176029
20173	M11 240010		UK	2011	invasive (unspecified/other)		B	269	ST-269 complex	ERR170754
20174	M11 240011		UK	2011	invasive (unspecified/other)		B	42	ST-41/44 complex/Lineage 3	ERR172583
20175	M11 240012		UK	2011	invasive (unspecified/other)		B	154	ST-41/44 complex/Lineage 3	ERR170755
20176	M11 240013		UK	2011	invasive (unspecified/other)		B	9890	ST-32 complex/ET-5 complex	ERR170756
20177	M11 240014		UK	2011	invasive (unspecified/other)		B	9891	ST-461 complex	ERR170757
20178	M11 240015		UK	2011	invasive (unspecified/other)		B	1159		ERR170758
20179	M11 240016		UK	2011	invasive (unspecified/other)		B	1096	ST-32 complex/ET-5 complex	ERR170759
20180	M11 240017		UK	2011	invasive (unspecified/other)		B	9819	ST-41/44 complex/Lineage 3	ERR170760
20181	M11 240018		UK	2011	invasive (unspecified/other)		B	9820	ST-41/44 complex/Lineage 3	ERR170761
20182	M11 240019		UK	2011	invasive (unspecified/other)		B	8063	ST-35 complex	ERR170762
20183	M11 240021		UK	2011	invasive (unspecified/other)		B	259	ST-32 complex/ET-5 complex	ERR170763
20184	M11 240022		UK	2011	invasive (unspecified/other)		B	1161	ST-269 complex	ERR170764
20185	M11 240023		UK	2011	invasive (unspecified/other)		B	41	ST-41/44 complex/Lineage 3	ERR170765
20186	M11 240024		UK	2011	invasive (unspecified/other)		B	1097	ST-41/44 complex/Lineage 3	ERR170766
20187	M11 240025		UK	2011	invasive (unspecified/other)		B	1049	ST-269 complex	ERR170767
20188	M11 240026		UK	2011	invasive (unspecified/other)		B	1049	ST-269 complex	ERR170768
20189	M11 240027		UK	2011	invasive (unspecified/other)		B	60	ST-60 complex	ERR170769
20190	M11 240028		UK	2011	invasive (unspecified/other)		B	60	ST-60 complex	ERR170770
20191	M11 240029		UK	2011	invasive (unspecified/other)		W-135	1286	ST-22 complex	ERR170771
20192	M11 240030		UK	2011	invasive (unspecified/other)		B	269	ST-269 complex	ERR170772
20193	M11 240031		UK	2011	invasive (unspecified/other)		Y	1655	ST-23 complex/Cluster A3	ERR170773
20194	M11 240032		UK	2011	invasive (unspecified/other)		B	5849		ERR170774
20195	M11 240034		UK	2011	invasive (unspecified/other)		B	5861	ST-41/44 complex/Lineage 3	ERR176030
20196	M11 240035		UK	2011	invasive (unspecified/other)		W-135	11	ST-11 complex/ET-37 complex	ERR170775
20197	M11 240036		UK	2011	invasive (unspecified/other)		Y	1655	ST-23 complex/Cluster A3	ERR170776
20198	M11 240037		UK	2011	invasive (unspecified/other)		B	34	ST-32 complex/ET-5 complex	ERR170777
20199	M11 240038		UK	2011	invasive (unspecified/other)		Y	168	ST-167 complex	ERR170778
20200	M11 240039		UK	2011	invasive (unspecified/other)		B	1802	ST-282 complex	ERR170779
20201	M11 240040		UK	2011	invasive (unspecified/other)		B	1196	ST-41/44 complex/Lineage 3	ERR176031
20202	M11 240041		UK	2011	invasive (unspecified/other)		B	477	ST-41/44 complex/Lineage 3	ERR176032
20203	M11 240042		UK	2011	invasive (unspecified/other)		B	1946	ST-461 complex	ERR176033
20204	M11 240043		UK	2011	invasive (unspecified/other)		Y	9842	ST-23 complex/Cluster A3	ERR170780
20205	M11 240044		UK	2011	invasive (unspecified/other)		B	9843	ST-269 complex	ERR176034
20206	M11 240045		UK	2011	invasive (unspecified/other)		B	858	ST-18 complex	ERR176035
20207	M11 240046		UK	2011	invasive (unspecified/other)		B	213	ST-213 complex	ERR176036
20208	M11 240047		UK	2011	invasive (unspecified/other)		B	41	ST-41/44 complex/Lineage 3	ERR170781
20209	M11 240048		UK	2011	invasive (unspecified/other)		B	60	ST-60 complex	ERR176037
20210	M11 240050		UK	2011	invasive (unspecified/other)		B	213	ST-213 complex	ERR170782
20211	M11 240052		UK	2011	invasive (unspecified/other)		B	461	ST-461 complex	ERR176038
20212	M11 240053		UK	2011	invasive (unspecified/other)		B	41	ST-41/44 complex/Lineage 3	ERR176039
20213	M11 240054		UK	2011	invasive (unspecified/other)		B	41	ST-41/44 complex/Lineage 3	ERR176040
20214	M11 240055		UK	2011	invasive (unspecified/other)		B	41	ST-41/44 complex/Lineage 3	ERR176041
20215	M11 240056		UK	2011	invasive (unspecified/other)		B	11	ST-11 complex/ET-37 complex	ERR170783
20216	M11 240057		UK	2011	invasive (unspecified/other)		W-135	11	ST-11 complex/ET-37 complex	ERR176042
20217	M11 240058		UK	2011	invasive (unspecified/other)		B	275	ST-269 complex	ERR176043
20218	M11 240059		UK	2011	invasive (unspecified/other)		B	9832	ST-41/44 complex/Lineage 3	ERR176044
20219	M11 240060		UK	2011	invasive (unspecified/other)		B	2380	ST-35 complex	ERR176045
20220	M11 240061		UK	2011	invasive (unspecified/other)		B	9833	ST-213 complex	ERR176046
20221	M11 240062		UK	2011	invasive (unspecified/other)		B	275	ST-269 complex	ERR176047
20222	M11 240063		UK	2011	invasive (unspecified/other)		B	41	ST-41/44 complex/Lineage 3	ERR176048
20223	M11 240064		UK	2011	invasive (unspecified/other)		Y	7786		ERR176049
20224	M11 240065		UK	2011	invasive (unspecified/other)		Y	1655	ST-23 complex/Cluster A3	ERR170784
20225	M11 240066		UK	2011	invasive (unspecified/other)		B	275	ST-269 complex	ERR170785
20226	M11 240067		UK	2011	invasive (unspecified/other)		W-135	11	ST-11 complex/ET-37 complex	ERR170786
20227	M11 240068		UK	2011	invasive (unspecified/other)		NG	9844		ERR170787
20228	M11 240069		UK	2011	invasive (unspecified/other)		B	35	ST-35 complex	ERR170788
20229	M11 240070		UK	2011	invasive (unspecified/other)		B	269	ST-269 complex	ERR170789
20230	M11 240071		UK	2011	invasive (unspecified/other)		Y	767	ST-167 complex	ERR170790
20231	M11 240072		UK	2011	invasive (unspecified/other)		B	275	ST-269 complex	ERR170791
20232	M11 240073		UK	2011	invasive (unspecified/other)		Y	1466	ST-174 complex	ERR170792
20233	M11 240074		UK	2011	invasive (unspecified/other)		B	213	ST-213 complex	ERR170793
20234	M11 240076		UK	2011	invasive (unspecified/other)		C	11	ST-11 complex/ET-37 complex	ERR170794
20235	M11 240077		UK	2011	invasive (unspecified/other)		B	269	ST-269 complex	ERR170795
20236	M11 240079		UK	2011	invasive (unspecified/other)		B	41	ST-41/44 complex/Lineage 3	ERR170796
20237	M11 240081		UK	2011	invasive (unspecified/other)		B	1194	ST-41/44 complex/Lineage 3	ERR170797
20238	M11 240082		UK	2011	invasive (unspecified/other)		B	290	ST-32 complex/ET-5 complex	ERR170798
20239	M11 240083		UK	2011	invasive (unspecified/other)		B	461	ST-461 complex	ERR170799
20240	M11 240084		UK	2011	invasive (unspecified/other)		B	4997	ST-18 complex	ERR170800
20241	M11 240085		UK	2011	invasive (unspecified/other)		B	340	ST-41/44 complex/Lineage 3	ERR170801
20242	M11 240086		UK	2011	invasive (unspecified/other)		B	1774	ST-269 complex	ERR170802
20243	M11 240088		UK	2011	invasive (unspecified/other)		B	485	ST-41/44 complex/Lineage 3	ERR170803
20244	M11 240094		UK	2011	invasive (unspecified/other)		C	5133	ST-103 complex	ERR170804
20245	M11 240096		UK	2011	invasive (unspecified/other)		Y	1655	ST-23 complex/Cluster A3	ERR170805
20246	M11 240097		UK	2011	invasive (unspecified/other)		B	2799	ST-41/44 complex/Lineage 3	ERR170806
20247	M11 240099		UK	2011	invasive (unspecified/other)		W-135	11	ST-11 complex/ET-37 complex	ERR170807
20248	M11 240100		UK	2011	invasive (unspecified/other)		B	9239	ST-103 complex	ERR170808
20249	M11 240108		UK	2011	invasive (unspecified/other)		B	2632	ST-41/44 complex/Lineage 3	ERR170809
20250	M11 240109		UK	2011	invasive (unspecified/other)		B	2931	ST-32 complex/ET-5 complex	ERR170810
20251	M11 240110		UK	2011	invasive (unspecified/other)		B	1194	ST-41/44 complex/Lineage 3	ERR170811
20252	M11 240111		UK	2011	invasive (unspecified/other)		B	213	ST-213 complex	ERR170812
20253	M11 240112		UK	2011	invasive (unspecified/other)		B	8052	ST-41/44 complex/Lineage 3	ERR170813
20254	M11 240113		UK	2011	invasive (unspecified/other)		B	2666	ST-213 complex	ERR170814
20255	M11 240115		UK	2011	invasive (unspecified/other)		B	5981	ST-41/44 complex/Lineage 3	ERR170815
20256	M11 240116		UK	2011	invasive (unspecified/other)		Y	1655	ST-23 complex/Cluster A3	ERR170816
20257	M11 240117		UK	2011	invasive (unspecified/other)		B	9821	ST-60 complex	ERR170817
20258	M11 240119		UK	2011	invasive (unspecified/other)		B	437	ST-41/44 complex/Lineage 3	ERR170819
20259	M11 240121		UK	2011	invasive (unspecified/other)		B	213	ST-213 complex	ERR170820
20260	M11 240122		UK	2011	invasive (unspecified/other)		B	4713		ERR170821
20261	M11 240123		UK	2011	invasive (unspecified/other)		B	3537	ST-11 complex/ET-37 complex	ERR170822
20263	M11 240125		UK	2011	invasive (unspecified/other)		B	3818	ST-41/44 complex/Lineage 3	ERR170823
20264	M11 240126		UK	2011	invasive (unspecified/other)		Y	23	ST-23 complex/Cluster A3	ERR170824
20265	M11 240128		UK	2011	invasive (unspecified/other)		B	4713		ERR170825
20266	M11 240129		UK	2011	invasive (unspecified/other)		B	282	ST-282 complex	ERR170826
20267	M11 240131		UK	2011	invasive (unspecified/other)		B	162	ST-162 complex	ERR170827
20268	M11 240132		UK	2011	invasive (unspecified/other)		B	269	ST-269 complex	ERR170828
20269	M11 240133		UK	2011	invasive (unspecified/other)		B	18	ST-18 complex	ERR170829
20270	M11 240134		UK	2011	invasive (unspecified/other)		B	213	ST-213 complex	ERR170830
20271	M11 240137		UK	2011	invasive (unspecified/other)		B	213	ST-213 complex	ERR170831
20272	M11 240139		UK	2011	invasive (unspecified/other)		B	1161	ST-269 complex	ERR170832
20273	M11 240145		UK	2011	invasive (unspecified/other)		B	2080	ST-41/44 complex/Lineage 3	ERR170833
20274	M11 240146		UK	2011	invasive (unspecified/other)		B	275	ST-269 complex	ERR170834
20275	M11 240147		UK	2011	invasive (unspecified/other)		B	213	ST-213 complex	ERR170835
20276	M11 240148		UK	2011	invasive (unspecified/other)		B	41	ST-41/44 complex/Lineage 3	ERR170836
20277	M11 240149		UK	2011	invasive (unspecified/other)		B	2314	ST-41/44 complex/Lineage 3	ERR170837
20278	M11 240150		UK	2011	invasive (unspecified/other)		B	7939	ST-269 complex	ERR170838
20279	M11 240151		UK	2011	invasive (unspecified/other)		B	479	ST-269 complex	ERR170839
20280	M11 240152		UK	2011	invasive (unspecified/other)		B	1475	ST-41/44 complex/Lineage 3	ERR170840
20281	M11 240157		UK	2011	invasive (unspecified/other)		Y	10138	ST-23 complex/Cluster A3	ERR170841
20282	M11 240161		UK	2011	invasive (unspecified/other)		Y	1466	ST-174 complex	ERR170842
20283	M11 240163		UK	2011	invasive (unspecified/other)		B	327	ST-41/44 complex/Lineage 3	ERR170843
20284	M11 240164		UK	2011	invasive (unspecified/other)		B	5861	ST-41/44 complex/Lineage 3	ERR170844
20285	M11 240165		UK	2011	invasive (unspecified/other)		Y	1466	ST-174 complex	ERR170845
20286	M11 240166		UK	2011	invasive (unspecified/other)		Y	23	ST-23 complex/Cluster A3	ERR170846
20287	M11 240167		UK	2011	invasive (unspecified/other)		B	9327	ST-60 complex	ERR170847
20288	M11 240168		UK	2011	invasive (unspecified/other)		W-135	11	ST-11 complex/ET-37 complex	ERR170848
20289	M11 240170		UK	2011	invasive (unspecified/other)		B	10139	ST-41/44 complex/Lineage 3	ERR170849
20290	M11 240173		UK	2011	invasive (unspecified/other)		B	5981	ST-41/44 complex/Lineage 3	ERR170850
20291	M11 240174		UK	2011	invasive (unspecified/other)		B	35	ST-35 complex	ERR170851
20292	M11 240175		UK	2011	invasive (unspecified/other)		B	33	ST-32 complex/ET-5 complex	ERR170852
20293	M11 240176		UK	2011	invasive (unspecified/other)		B	3138		ERR170853
20294	M11 240180		UK	2011	invasive (unspecified/other)		B	1049	ST-269 complex	ERR170854
20295	M11 240181		UK	2011	invasive (unspecified/other)		B	213	ST-213 complex	ERR170855
20296	M11 240182		UK	2011	invasive (unspecified/other)		B	9834		ERR170856
20297	M11 240183		UK	2011	invasive (unspecified/other)		B	32	ST-32 complex/ET-5 complex	ERR170857
20298	M11 240185		UK	2011	invasive (unspecified/other)		B	1049	ST-269 complex	ERR170858
20299	M11 240188		UK	2011	invasive (unspecified/other)		B	41	ST-41/44 complex/Lineage 3	ERR170859
20300	M11 240189		UK	2011	invasive (unspecified/other)		B	8068	ST-282 complex	ERR170860
20301	M11 240191		UK	2011	invasive (unspecified/other)		B	9892	ST-41/44 complex/Lineage 3	ERR170861
20302	M11 240192		UK	2011	invasive (unspecified/other)		Y	1655	ST-23 complex/Cluster A3	ERR170862
20303	M11 240193		UK	2011	invasive (unspecified/other)		B	1097	ST-41/44 complex/Lineage 3	ERR170863
20304	M11 240195		UK	2011	invasive (unspecified/other)		B	1475	ST-41/44 complex/Lineage 3	ERR170864
20305	M11 240203		UK	2011	invasive (unspecified/other)		B	340	ST-41/44 complex/Lineage 3	ERR170865
20306	M11 240206		UK	2011	invasive (unspecified/other)		B	461	ST-461 complex	ERR170866
20307	M11 240207		UK	2011	invasive (unspecified/other)		C	839	ST-41/44 complex/Lineage 3	ERR170867
20308	M11 240209		UK	2011	invasive (unspecified/other)		Y	1466	ST-174 complex	ERR170868
20309	M11 240210		UK	2011	invasive (unspecified/other)		Y	23	ST-23 complex/Cluster A3	ERR170869
20310	M11 240211		UK	2011	invasive (unspecified/other)		Y	9893	ST-174 complex	ERR170870
20311	M11 240212		UK	2011	invasive (unspecified/other)		B	275	ST-269 complex	ERR170871
20312	M11 240213		UK	2011	invasive (unspecified/other)		B	1194	ST-41/44 complex/Lineage 3	ERR170872
20313	M11 240214		UK	2011	invasive (unspecified/other)		B	1946	ST-461 complex	ERR170873
20314	M11 240215		UK	2011	invasive (unspecified/other)		Y	1655	ST-23 complex/Cluster A3	ERR170874
20315	M11 240216		UK	2011	invasive (unspecified/other)		Y	1655	ST-23 complex/Cluster A3	ERR170875
20316	M11 240226		UK	2011	invasive (unspecified/other)		B	269	ST-269 complex	ERR170876
20317	M11 240227		UK	2011	invasive (unspecified/other)		Y	6463	ST-23 complex/Cluster A3	ERR170877
20318	M11 240231		UK	2011	invasive (unspecified/other)		W-135	184	ST-22 complex	ERR170878
20319	M11 240232		UK	2011	invasive (unspecified/other)		B	35	ST-35 complex	ERR170879
20320	M11 240233		UK	2011	invasive (unspecified/other)		NG	9835	ST-226 complex	ERR170880
20321	M11 240234		UK	2011	invasive (unspecified/other)		C	5238		ERR170881
20322	M11 240236		UK	2011	invasive (unspecified/other)		B	1161	ST-269 complex	ERR170882
20323	M11 240237		UK	2011	invasive (unspecified/other)		B	3482		ERR170883
20324	M11 240241		UK	2011	invasive (unspecified/other)		B	1194	ST-41/44 complex/Lineage 3	ERR170884
20325	M11 240242		UK	2011	invasive (unspecified/other)		B	1194	ST-41/44 complex/Lineage 3	ERR170885
20326	M11 240243		UK	2011	invasive (unspecified/other)		B	9845		ERR170886
20327	M11 240244		UK	2011	invasive (unspecified/other)		B	1960	ST-41/44 complex/Lineage 3	ERR170887
20328	M11 240246		UK	2011	invasive (unspecified/other)		NG	60	ST-60 complex	ERR170888
20329	M11 240247		UK	2011	invasive (unspecified/other)		C	11	ST-11 complex/ET-37 complex	ERR170889
20330	M11 240248		UK	2011	invasive (unspecified/other)		B	1194	ST-41/44 complex/Lineage 3	ERR170890
20331	M11 240249		UK	2011	invasive (unspecified/other)		B	8944		ERR170891
20332	M11 240251		UK	2011	invasive (unspecified/other)		B	269	ST-269 complex	ERR170892
20333	M11 240255		UK	2011	invasive (unspecified/other)		B	1090	ST-41/44 complex/Lineage 3	ERR170893
20334	M11 240256		UK	2011	invasive (unspecified/other)		B	9822	ST-41/44 complex/Lineage 3	ERR170894
20335	M11 240258		UK	2011	invasive (unspecified/other)		Y	23	ST-23 complex/Cluster A3	ERR170895
20336	M11 240259		UK	2011	invasive (unspecified/other)		B	41	ST-41/44 complex/Lineage 3	ERR170896
20337	M11 240261		UK	2011	invasive (unspecified/other)		W-135	184	ST-22 complex	ERR170897
20338	M11 240262		UK	2011	invasive (unspecified/other)		A	4789	ST-5 complex/subgroup III	ERR170898
20339	M11 240263		UK	2011	invasive (unspecified/other)		Y	1655	ST-23 complex/Cluster A3	ERR170899
20340	M11 240265		UK	2011	invasive (unspecified/other)		B	9836	ST-269 complex	ERR170900
20341	M11 240266		UK	2011	invasive (unspecified/other)		B	213	ST-213 complex	ERR170901
20342	M11 240268		UK	2011	invasive (unspecified/other)		B	213	ST-213 complex	ERR170902
20343	M11 240269		UK	2011	invasive (unspecified/other)		B	1090	ST-41/44 complex/Lineage 3	ERR170903
20344	M11 240275		UK	2011	invasive (unspecified/other)		B	269	ST-269 complex	ERR170904
20345	M11 240276		UK	2011	invasive (unspecified/other)		B	41	ST-41/44 complex/Lineage 3	ERR170905
20346	M11 240277		UK	2011	invasive (unspecified/other)		Y	1655	ST-23 complex/Cluster A3	ERR170906
20347	M11 240278		UK	2011	invasive (unspecified/other)		Y	1655	ST-23 complex/Cluster A3	ERR170907
20348	M11 240280		UK	2011	invasive (unspecified/other)		B	278	ST-35 complex	ERR170908
20349	M11 240281		UK	2011	invasive (unspecified/other)		B	275	ST-269 complex	ERR170909
20350	M11 240282		UK	2011	invasive (unspecified/other)		B	213	ST-213 complex	ERR170910
20351	M11 240283		UK	2011	invasive (unspecified/other)		Y	23	ST-23 complex/Cluster A3	ERR170911
20352	M11 240284		UK	2011	invasive (unspecified/other)		B	1161	ST-269 complex	ERR170912
20353	M11 240285		UK	2011	invasive (unspecified/other)		B	33	ST-32 complex/ET-5 complex	ERR170913
20354	M11 240286		UK	2011	invasive (unspecified/other)		B	9894		ERR170914
20355	M11 240287		UK	2011	invasive (unspecified/other)		B	9846	ST-865 complex	ERR170915
20356	M11 240289		UK	2011	invasive (unspecified/other)		B	340	ST-41/44 complex/Lineage 3	ERR170916
20357	M11 240290		UK	2011	invasive (unspecified/other)		B	9895	ST-213 complex	ERR170917
20358	M11 240291		UK	2011	invasive (unspecified/other)		B	2363	ST-41/44 complex/Lineage 3	ERR170918
20359	M11 240294		UK	2011	invasive (unspecified/other)		C	11	ST-11 complex/ET-37 complex	ERR170919
20360	M11 240295		UK	2011	invasive (unspecified/other)		B	303	ST-41/44 complex/Lineage 3	ERR170920
20361	M11 240296		UK	2011	invasive (unspecified/other)		B	34	ST-32 complex/ET-5 complex	ERR170921
20362	M11 240297		UK	2011	invasive (unspecified/other)		B	213	ST-213 complex	ERR170922
20363	M11 240298		UK	2011	invasive (unspecified/other)		Y	1655	ST-23 complex/Cluster A3	ERR170923
20364	M11 240299		UK	2011	invasive (unspecified/other)		B	2314	ST-41/44 complex/Lineage 3	ERR170924
20365	M11 240302		UK	2011	invasive (unspecified/other)		W-135	184	ST-22 complex	ERR170925
20366	M11 240303		UK	2011	invasive (unspecified/other)		B	275	ST-269 complex	ERR170926
20367	M11 240304		UK	2011	invasive (unspecified/other)		B	2888		ERR170927
20368	M11 240305		UK	2011	invasive (unspecified/other)		W-135	11	ST-11 complex/ET-37 complex	ERR170928
20369	M11 240306		UK	2011	invasive (unspecified/other)		B	41	ST-41/44 complex/Lineage 3	ERR170929
20370	M11 240309		UK	2011	invasive (unspecified/other)		B	9837		ERR172493
20371	M11 240311		UK	2011	invasive (unspecified/other)		B	9896	ST-41/44 complex/Lineage 3	ERR172494
20372	M11 240312		UK	2011	invasive (unspecified/other)		Y	23	ST-23 complex/Cluster A3	ERR172495
20373	M11 240313		UK	2011	invasive (unspecified/other)		Y	1655	ST-23 complex/Cluster A3	ERR172496
20374	M11 240314		UK	2011	invasive (unspecified/other)		B	1161	ST-269 complex	ERR172497
20375	M11 240315		UK	2011	invasive (unspecified/other)		B	1161	ST-269 complex	ERR172498
20376	M11 240316		UK	2011	invasive (unspecified/other)		B	479	ST-269 complex	ERR172499
20377	M11 240317		UK	2011	invasive (unspecified/other)		B	269	ST-269 complex	ERR172500
20378	M11 240318		UK	2011	invasive (unspecified/other)		B	9004	ST-269 complex	ERR172501
20379	M11 240319		UK	2011	invasive (unspecified/other)		Y	1655	ST-23 complex/Cluster A3	ERR172502
20380	M11 240322		UK	2011	invasive (unspecified/other)		Y	1655	ST-23 complex/Cluster A3	ERR172503
20381	M11 240323		UK	2011	invasive (unspecified/other)		B	9847		ERR172504
20382	M11 240324		UK	2011	invasive (unspecified/other)		C	32	ST-32 complex/ET-5 complex	ERR172505
20383	M11 240326		UK	2011	invasive (unspecified/other)		Y	1655	ST-23 complex/Cluster A3	ERR172506
20384	M11 240328		UK	2011	invasive (unspecified/other)		B	1194	ST-41/44 complex/Lineage 3	ERR172507
20385	M11 240330		UK	2011	invasive (unspecified/other)		B	1161	ST-269 complex	ERR172508
20386	M11 240333		UK	2011	invasive (unspecified/other)		B	833	ST-41/44 complex/Lineage 3	ERR172509
20387	M11 240334		UK	2011	invasive (unspecified/other)		B	6604	ST-269 complex	ERR172510
20388	M11 240335		UK	2011	invasive (unspecified/other)		B	162	ST-162 complex	ERR172511
20389	M11 240337		UK	2011	invasive (unspecified/other)		B	213	ST-213 complex	ERR172512
20390	M11 240338		UK	2011	invasive (unspecified/other)		B	3737	ST-1157 complex	ERR172513
20391	M11 240339		UK	2011	invasive (unspecified/other)		B	60	ST-60 complex	ERR172514
20392	M11 240341		UK	2011	invasive (unspecified/other)		B	485	ST-41/44 complex/Lineage 3	ERR172515
20393	M11 240342		UK	2011	invasive (unspecified/other)		B	32	ST-32 complex/ET-5 complex	ERR172516
20394	M11 240343		UK	2011	invasive (unspecified/other)		B	1200	ST-41/44 complex/Lineage 3	ERR172517
20395	M11 240344		UK	2011	invasive (unspecified/other)		B	213	ST-213 complex	ERR172518
20396	M11 240346		UK	2011	invasive (unspecified/other)		Y	168	ST-167 complex	ERR172519
20397	M11 240347		UK	2011	invasive (unspecified/other)		C	5133	ST-103 complex	ERR172520
20398	M11 240348		UK	2011	invasive (unspecified/other)		B	213	ST-213 complex	ERR172521
20399	M11 240349		UK	2011	invasive (unspecified/other)		W-135	22	ST-22 complex	ERR172522
20400	M11 240350		UK	2011	invasive (unspecified/other)		B	9838	ST-41/44 complex/Lineage 3	ERR172523
20401	M11 240352		UK	2011	invasive (unspecified/other)		B	1161	ST-269 complex	ERR172524
20402	M11 240353		UK	2011	invasive (unspecified/other)		B	275	ST-269 complex	ERR172525
20403	M11 240356		UK	2011	invasive (unspecified/other)		B	32	ST-32 complex/ET-5 complex	ERR172526
20404	M11 240358		UK	2011	invasive (unspecified/other)		Y	23	ST-23 complex/Cluster A3	ERR172527
20405	M11 240360		UK	2011	invasive (unspecified/other)		B	180	ST-41/44 complex/Lineage 3	ERR172528
20406	M11 240363		UK	2011	invasive (unspecified/other)		C	5315		ERR172529
20407	M11 240364		UK	2011	invasive (unspecified/other)		B	154	ST-41/44 complex/Lineage 3	ERR172530
20408	M11 240365		UK	2011	invasive (unspecified/other)		B	41	ST-41/44 complex/Lineage 3	ERR172531
20409	M11 240366		UK	2011	invasive (unspecified/other)		B	33	ST-32 complex/ET-5 complex	ERR172532
20410	M11 240367		UK	2011	invasive (unspecified/other)		B	46	ST-41/44 complex/Lineage 3	ERR172533
20411	M11 240368		UK	2011	invasive (unspecified/other)		B	269	ST-269 complex	ERR172534
20412	M11 240369		UK	2011	invasive (unspecified/other)		B	41	ST-41/44 complex/Lineage 3	ERR172535
20413	M11 240371		UK	2011	invasive (unspecified/other)		B	162	ST-162 complex	ERR172536
20414	M11 240372		UK	2011	invasive (unspecified/other)		NG	1655	ST-23 complex/Cluster A3	ERR172537
20415	M11 240373		UK	2011	invasive (unspecified/other)		B	1194	ST-41/44 complex/Lineage 3	ERR172538
20416	M11 240375		UK	2011	invasive (unspecified/other)		B	269	ST-269 complex	ERR172539
20417	M11 240376		UK	2011	invasive (unspecified/other)		B	269	ST-269 complex	ERR172540
20418	M11 240381		UK	2011	invasive (unspecified/other)		B	162	ST-162 complex	ERR172541
20419	M11 240382		UK	2011	invasive (unspecified/other)		B	485	ST-41/44 complex/Lineage 3	ERR172542
20420	M11 240383		UK	2011	invasive (unspecified/other)		B	3077	ST-35 complex	ERR172543
20421	M11 240386		UK	2011	invasive (unspecified/other)		B	41	ST-41/44 complex/Lineage 3	ERR172544
20422	M11 240387		UK	2011	invasive (unspecified/other)		W-135	184	ST-22 complex	ERR172545
20423	M11 240388		UK	2011	invasive (unspecified/other)		B	9823	ST-269 complex	ERR172546
20424	M11 240389		UK	2011	invasive (unspecified/other)		W-135	11	ST-11 complex/ET-37 complex	ERR172547
20425	M11 240390		UK	2011	invasive (unspecified/other)		B	1159		ERR172548
20426	M11 240391		UK	2011	invasive (unspecified/other)		B	9824	ST-41/44 complex/Lineage 3	ERR172549
20427	M11 240392		UK	2011	invasive (unspecified/other)		B	290	ST-32 complex/ET-5 complex	ERR172550
20428	M11 240394		UK	2011	invasive (unspecified/other)		B	5103	ST-60 complex	ERR172551
20429	M11 240395		UK	2011	invasive (unspecified/other)		B	1163	ST-269 complex	ERR172552
20430	M11 240396		UK	2011	invasive (unspecified/other)		Y	1655	ST-23 complex/Cluster A3	ERR172553
20431	M11 240397		UK	2011	invasive (unspecified/other)		B	1161	ST-269 complex	ERR172554
20432	M11 240398		UK	2011	invasive (unspecified/other)		B	41	ST-41/44 complex/Lineage 3	ERR172555
20433	M11 240399		UK	2011	invasive (unspecified/other)		Y	1655	ST-23 complex/Cluster A3	ERR172556
20434	M11 240401		UK	2011	invasive (unspecified/other)		B	1161	ST-269 complex	ERR172557
20435	M11 240402		UK	2011	invasive (unspecified/other)		B	9825		ERR172558
20436	M11 240403		UK	2011	invasive (unspecified/other)		W-135	11	ST-11 complex/ET-37 complex	ERR172559
20437	M11 240405		UK	2011	invasive (unspecified/other)		B	1161	ST-269 complex	ERR172560
20438	M11 240406		UK	2011	invasive (unspecified/other)		B	32	ST-32 complex/ET-5 complex	ERR172561
20439	M11 240409		UK	2011	invasive (unspecified/other)		B	269	ST-269 complex	ERR172562
20440	M11 240411		UK	2011	invasive (unspecified/other)		Y	4183	ST-23 complex/Cluster A3	ERR172563
20441	M11 240412		UK	2011	invasive (unspecified/other)		B	1430	ST-60 complex	ERR172564
20442	M11 240413		UK	2011	invasive (unspecified/other)		B	9826	ST-269 complex	ERR172565
20443	M11 240414		UK	2011	invasive (unspecified/other)		B	5551	ST-41/44 complex/Lineage 3	ERR172566
20444	M11 240417		UK	2011	invasive (unspecified/other)		W-135	11	ST-11 complex/ET-37 complex	ERR172567
20445	M11 240420		UK	2011	invasive (unspecified/other)		B	41	ST-41/44 complex/Lineage 3	ERR172568
20446	M11 240422		UK	2011	invasive (unspecified/other)		B	467	ST-269 complex	ERR172569
20447	M11 240424		UK	2011	invasive (unspecified/other)		B	3101	ST-41/44 complex/Lineage 3	ERR172570
20448	M11 240425		UK	2011	invasive (unspecified/other)		B	41	ST-41/44 complex/Lineage 3	ERR172571
20449	M11 240427		UK	2011	invasive (unspecified/other)		W-135	11	ST-11 complex/ET-37 complex	ERR172572
20450	M11 240428		UK	2011	invasive (unspecified/other)		B	275	ST-269 complex	ERR172573
20451	M11 240430		UK	2011	invasive (unspecified/other)		Y	23	ST-23 complex/Cluster A3	ERR172574
20452	M11 240431		UK	2011	invasive (unspecified/other)		B	9827		ERR172575
20453	M11 240434		UK	2011	invasive (unspecified/other)		B	1194	ST-41/44 complex/Lineage 3	ERR172576
20454	M11 240435		UK	2011	invasive (unspecified/other)		Y	1655	ST-23 complex/Cluster A3	ERR172577
20455	M11 240436		UK	2011	invasive (unspecified/other)		B	1161	ST-269 complex	ERR172578
20456	M11 240437		UK	2011	invasive (unspecified/other)		Y	784	ST-92 complex	ERR172579
20457	M11 240440		UK	2011	invasive (unspecified/other)		B	60	ST-60 complex	ERR172580
20458	M11 240441		UK	2011	invasive (unspecified/other)		W-135	2977	ST-174 complex	ERR172581
20459	M11 240442		UK	2011	invasive (unspecified/other)		Y	23	ST-23 complex/Cluster A3	ERR172582
20470	M11 240118		UK	2011	invasive (unspecified/other)		B	41	ST-41/44 complex/Lineage 3	ERR170818

## Sheet: S_aureus
Datasets S1 (S. aureus): Genomes included in the study dataset, with available metadata and genome sequence accession numbers.
BIGS id	Strain	Aliases	Country	Year	Source	Published	PubMed ID	ST	CC	Accession number
58	COL	CP000046; NC_002951	UK			Yes	15774886	250	5	CP000046
59	Mu50	BA000017; NC_002758	Japan	1997	human	Yes	11418146; 15141945	5	5	BA000017
60	N315	BA000018; NC_002745	Japan	1982	human	Yes	11418146	5	5	BA000018
61	USA300_TCH1516	CP000730; NC_010079	USA			Yes	17986343	8	5	CP000730
62	JH1	CP000736; NC_009632				Yes	17517606	105	5	CP000736
63	JH9	CP000703; NC_009487	USA	2000	human	Yes	17517606	105	5	CP000703
64	USA300_FPR3757	CP000255; NC_007793	USA		wrist abscess	Yes	16517273	8	5	CP000255
65	Mu3	AP009324; NC_009782	Japan	1996	human	Yes	9400512; 17954695	5	5	AP009324
67	MRSA252	BX571856; NC_002952				Yes	15213324	36	30	BX571856
69	MW2	BA000033; NC_003923	USA	1998	Human girl	Yes	12044378	1	15	BA000033
1231	JKD6008		New Zealand	2003	Human blood	Yes	20802046	239	5	CP002120
1233	TCH60				Human skin sample	Genbank		30	30	CP002110
1239	TCH130				Human skin	Genbank		72	5	PRJNA31541
1240	TCH70		USA		Human skin	Genbank		1	15	PRJNA31543
1351	A5937					Genbank		5	5	PRJNA36465
1352	A5948					Genbank		8	5	PRJNA36467
1353	A6224					Genbank		5	5	PRJNA36469
1354	A6300					Genbank		5	5	PRJNA36471
1355	A8115					Genbank		5	5	PRJNA36473
1359	A9763					Genbank		5	5	PRJNA36481
1361	132					Yes	19581398	8	5	PRJNA37915
1963	47771	SRR445045	Denmark	2005	Human	Yes	22354957	398	398	SRR445045
1964	50148	SRR445053	Denmark	2006	Human	Yes	22354957	398	398	SRR445053
1965	51726	SRR445057	Denmark	2006	Human	Yes	22354957	398	398	SRR445057
1970	60036	SRR445073	Denmark	2008	Human	Yes	22354957	398	398	SRR445073
1971	61888	SRR445074	Denmark	2008	Human	Yes	22354957	398	398	SRR445074
1999	04-02981		Germany	2004		Yes	20386717	225	5	PRJNA34809
2018	51225	SRR445280	Denmark	2006	Human	Yes	22354957	398	398	SRR445280
2027	55488	SRR445289	Denmark	2007	Human	Yes	22354957	398	398	SRR445289
2032	JKD6159				clinical isolate	Yes	20729356	93	Singleton93	PRJNA50759
2033	ST398					Yes	20546576	398	398	PRJEA29427
2034	TW20 0582					Yes	19948800	239	5	PRJEA36647
2036	T0131		China	2006	87 year-old patient	Yes	21551295	239	5	PRJNA65323
2037	MRSA_1B		UK	2009	Neonate	Yes	22693998	22	22	ERR101899
2038	MRSA_6C		UK	2009	Neonate	Yes	22693998	22	22	ERR103403
2039	MRSA_7C		UK	2009	Neonate	Yes	22693998	22	22	ERR103404
2040	MRSA_8C		UK	2009	Neonate	Yes	22693998	22	22	ERR103405
2041	MRSA_10C		UK	2009	Neonate	Yes	22693998	22	22	ERR101899
2042	MRSA_11C		UK	2009	Neonate	Yes	22693998	22	22	ERR101900
2043	MRSA_12C		UK	2009	Neonate	Yes	22693998	22	22	ERR103394
2044	MRSA_14C		UK	2009	Neonate	Yes	22693998	5	5	ERR103395
2045	MRSA_15C		UK	2009	Neonate	Yes	22693998	22	22	ERR103396
2047	MRSA_17B		UK	2009	Neonate	Yes	22693998	1	15	ERR103398
2048	MRSA_18B		UK	2009	Neonate	Yes	22693998	22	22	ERR103399
2049	MRSA_19B		UK	2009	Neonate	Yes	22693998	22	22	ERR103400
2050	MRSA_20B		UK	2009	Neonate	Yes	22693998	22	22	ERR103402
2099	TW20		UK	2003		Yes	17243050	239	5	PRJEA36647
2114	01.7997.S		UK	2001	Wound swab	Yes	15811459	30	30	SRR016390
2117	55/2798		UK	1955	Clinical isolate	Yes	15811459	30	30	SRR016399
2118	SRR493912	M0001				Genbank		105	5	SRR493912
2119	58-362		USA	1958	Sternal wound	Yes	15811459	30	30	SRR016782
2122	65-20		USA	1965	Sternal wound	Yes	15811459	30	30	SRR016389
2123	66-1888		USA	1966	Neck	Yes	15811459	30	30	SRR016781
2125	68-81		USA	1968	Urine	Yes	15811459	30	30	SRR016400
2126	69-172		USA	1969	Nasal swab	Yes	15811459	30	30	SRR016391
2127	69-412		USA	1969	Blood	Yes	15811459	30	30	SRR016783
2134	M1016		Australia	1962	unknown	Yes	15811459	30	30	SRR016780
2142	75916		Finland	1995	Clinical isolate	Yes	15811459	36	30	SRR016393
2206	ERR017170	98-26821	UK	1998		Yes	23299977	22	22	ERR017170
2207	ERR017173	09-01247	Singapore	2004		Yes	23299977	22	22	ERR017173
2208	ERR017176	90/10685	UK	1990		Yes	23299977	22	22	ERR017176
2209	ERR017181	09-01243	Singapore	2004		Yes	23299977	22	22	ERR017181
2210	ERR017184	09-00979				Yes	23299977	22	22	ERR017184
2245	P4	ERR070044	UK	2011		Yes	23158674	2371	22	ERR070044
2266	ERR072252	SASCBU23	UK	2011		Yes	23158674	22	22	ERR072252
2267	ERR085402	SASCBU3	UK	2011		Yes	23158678	2371	22	ERR085402
2268	ERR085405	SASCBU6	UK	2011		Yes	23158678	2371	22	ERR085405
2269	ERR085408	SASCBU9	UK	2011		Yes	23158678	2371	22	ERR085408
2270	ERR085411	SASCBU12	UK	2011		Yes	23158678	2371	22	ERR085411
2287	SRR497512	M0692				Genbank		105	5	SRR497512
2294	11819-97		Denmark	1997	Skin infection	Yes	22374956	80	80	PRJNA78269
2295	M013		Taiwan	2002	Wound	Yes	22328755	59	59	PRJNA78007
2317	A8117					Genbank		105	5	SRR016126
2318	A10102					Genbank		5	5	SRR016128
2327	A9719		USA		Massachusetts	Genbank		5	5	SRR016153
2328	A9781		USA		Boston	Genbank		5	5	SRR016155
2329	A9299		USA		New York	Genbank		5	5	SRR016156
2334	A9765		USA		Chicago	Genbank		8	5	SRR016123
2343	702987	07-02987	Australia	2006		Yes	23299977	22	22	ERR017251
2344	702159	07-02159	Germany	2007		Yes	23299977	22	22	ERR017259
2346	A9635					Genbank		1892	45	SRR016127
2359	D_2		UK	2011	Nasal swab	Yes	22674929	88	88	ERR127412
2360	A		UK	2011	Nasal swab	Yes	22674929	88	88	ERR127410
2361	E		UK	2011	Nasal swab	Yes	22674929	88	88	ERR127408
2362	B		UK	2011	Nasal swab	Yes	22674929	88	88	ERR127414
2363	G		UK	2011	Nasal swab	Yes	22674929	88	88	ERR127409
2364	C		UK	2011	Nasal swab	Yes	22674929	88	88	ERR127415
2365	F		UK	2011	Nasal swab	Yes	22674929	88	88	ERR127413
2366	H_2		UK	2011	Blood culture, nasal	Yes	22674929	88	88	ERR127411
2367	I		UK	2011	Nasal swab	Yes	22674929	30	30	ERR127441
2369	K		UK	2011	Nasal swab	Yes	22674929	5	5	ERR127442
2370	L		UK	2011	Nasal swab	Yes	22674929	6	5	ERR127443
2371	M		UK	2011	Nasal swab	Yes	22674929	15	15	ERR127447
2372	N		UK	2011	Nasal swab	Yes	22674929	15	15	ERR127444
2373	O		UK	2011	Nasal swab	Yes	22674929	15	15	ERR127448
2374	P		UK	2011	Nasal swab	Yes	22674929	8	5	ERR127445
2375	Q		UK	2011	Caesarian section	Yes	22674929	772	15	ERR127432
2376	R		UK	2011	Caesarian section	Yes	22674929	772	15	ERR127433
2377	S		UK	2011	Caesarian section	Yes	22674929	772	15	ERR127429
2378	T		UK	2011	Breast abscess	Yes	22674929	772	15	ERR127428
2379	U		UK	2011	Finger abscess	Yes	22674929	772	15	ERR127426
2380	V		UK	2011	Nasal swab	Yes	22674929	772	15	ERR127427
2381	W		UK	2011		Yes	22674929	772	15	ERR127431
2382	X		UK	2011		Yes	22674929	772	15	ERR127430
2383	D		UK	2011	Nasal swab	Yes	22674929	88	88	ERR127416
2384	H		UK	2011	Nasal swab	Yes	22674929	88	88	ERR127417
2385	03.1791.F		UK	2003	Blood	Yes	22586109	36	30	SRR453031
2386	06.9570.L		UK	2006	Sputum	Yes	22586109	36	30	SRR453032
2387	07.1227.Z		UK	2007	Blood	Yes	22586109	36	30	SRR453033
2388	07.1696.F		UK	2007	Nasal swab	Yes	22586109	36	30	SRR453034
2389	07.1712.D		UK	2007	Broncho-alveolar	Yes	22586109	36	30	SRR453035
2391	07.2449.K		UK	2007	Blood	Yes	22586109	36	30	SRR453037
2392	07.2496.L		UK	2007	Wound swab	Yes	22586109	36	30	SRR453038
2393	07.2589.M		UK	2007	Blood	Yes	22586109	36	30	SRR453039
2394	07.2880.V		UK	2007	Sputum	Yes	22586109	36	30	SRR453040
2395	07.3841.N		UK	2007	Nose/axilla	Yes	22586109	36	30	SRR453041
2397	07.6659.K		UK	2007	Nasal swab	Yes	22586109	36	30	SRR453043
2398	07.7206.Y		UK	2007	Blood	Yes	22586109	36	30	SRR453044
2401	DEN4415		Denmark	2001	Clinical isolate	Yes	1081382	36	30	SRR453047
2403	HU275		Hungary	2002	Blood/CSF	Yes	17697003	36	30	SRR453074
2404	3366		Ireland	1999	Clinical isolate	Yes	1087651	36	30	SRR453075
2408	BK2421	ERR064899	USA	1996		Yes	20093474	239	5	ERR064899
2409	LHH1	ERR064900	USA	1994		Yes	20093474	239	5	ERR064900
2411	GRE18	ERR064902	Greece	1998		Yes	20093474	239	5	ERR064902
2412	GRE317	ERR064903	Greece	1999		Yes	20093474	239	5	ERR064903
2413	GRE4	ERR064904	Greece	1998		Yes	20093474	239	5	ERR064904
2414	TUR9	ERR064905	Turkey	1995		Yes	20093474	25	25	ERR064905
2415	TUR1	ERR064906	Turkey	1996		Yes	20093474	239	5	ERR064906
2417	TUR27	ERR064908	Turkey	1996		Yes	20093474	239	5	ERR064908
2418	HU109	ERR064909	Hungary	1996		Yes	20093474	239	5	ERR064909
2419	HUR18	ERR064910	Hungary	1997		Yes	20093474	239	5	ERR064910
2420	URU110	ERR064911	Uraguay	1998		Yes	20093474	1225	5	ERR064911
2422	HU25	ERR064913	Brazil	1993		Yes	20093474	239	5	ERR064913
2423	BRA2	ERR064914	Brazil	1997		Yes	20093474	239	5	ERR064914
2424	CHL1	ERR064915	Chile	1997		Yes	20093474	239	5	ERR064915
2425	CHL151	ERR064916	Chile	1998		Yes	20093474	239	5	ERR064916
2426	BRA36	ERR064917	Brazil	1997		Yes	20093474	239	5	ERR064917
2427	BZ48	ERR064918	Brazil	1997		Yes	20093474	239	5	ERR064918
2429	HSJ216	ERR064920	Portugal	1997		Yes	20093474	239	5	ERR064920
2430	HGSA9	ERR064921	Portugal	1997		Yes	20093474	239	5	ERR064921
2431	HGSA142	ERR064922	Portugal	2003		Yes	20093474	239	5	ERR064922
2434	URU34	ERR064925	Uraguay	1997		Yes	20093474	239	5	ERR064925
2436	HU106	ERR064927	Hungary	1996		Yes	20093474	239	5	ERR064927
2437	HUSA304	ERR064928	Hungary	1993		Yes	20093474	239	5	ERR064928
2438	HSA11	ERR064929	Portugal	1992		Yes	20093474	239	5	ERR064929
2439	HDG2	ERR064930	Portugal	1992		Yes	20093474	239	5	ERR064930
2440	HSA10	ERR064931	Portugal	1992		Yes	20093474	239	5	ERR064931
2441	FFP103	ERR064932	Portugal	1990		Yes	20093474	239	5	ERR064932
2442	ICP5011	ERR064933	Portugal	1993		Yes	20093474	239	5	ERR064933
2443	ICP5014	ERR064934	Portugal	1993		Yes	20093474	239	5	ERR064934
2444	ICP5062	ERR064935	Portugal	1993		Yes	20093474	239	5	ERR064935
2445	GRE108	ERR064936	Greece	1998		Yes	20093474	72	5	ERR064936
2446	CHI59	ERR064937	China	1998		Yes	20093474	239	5	ERR064937
2447	CHI61	ERR064938	China	1998		Yes	20093474	239	5	ERR064938
2448	S85	ERR064939	Thailand	2007		Yes	20093474	239	5	ERR064939
2449	S130	ERR064940	Thailand	2007		Yes	20093474	239	5	ERR064940
2450	S87	ERR064941	Thailand	2007		Yes	20093474	239	5	ERR064941
2451	S93	ERR064942	Thailand	2007		Yes	20093474	239	5	ERR064942
2452	S71	ERR064943	Thailand	2007		Yes	20093474	239	5	ERR064943
2453	S40	ERR064944	Thailand	2006		Yes	20093474	239	5	ERR064944
2454	S102	ERR064945	Thailand	2007		Yes	20093474	239	5	ERR064945
2455	S7	ERR064946	Thailand	2006		Yes	20093474	239	5	ERR064946
2456	S38	ERR064947	Thailand	2006		Yes	20093474	239	5	ERR064947
2457	DEN907	ERR064948	Denmark	2001		Yes	20093474	239	5	ERR064948
2458	S26	ERR064949	Thailand	2006		Yes	20093474	239	5	ERR064949
2459	S97	ERR064950	Thailand	2007		Yes	20093474	239	5	ERR064950
2460	S25	ERR064951	Thailand	2006		Yes	20093474	239	5	ERR064951
2461	S106	ERR064952	Thailand	2007		Yes	20093474	239	5	ERR064952
2462	S2	ERR064953	Thailand	2006		Yes	20093474	239	5	ERR064953
2463	S78	ERR064954	Thailand	2007		Yes	20093474	239	5	ERR064954
2464	S42	ERR064955	Thailand	2006		Yes	20093474	239	5	ERR064955
2465	S81	ERR064956	Thailand	2007		Yes	20093474	239	5	ERR064956
2466	S24	ERR064957	Thailand	2006		Yes	20093474	239	5	ERR064957
2467	S21	ERR064958	Thailand	2006		Yes	20093474	239	5	ERR064958
2468	S39	ERR064959	Thailand	2006		Yes	20093474	239	5	ERR064959
2478	ERR024964	DF36				Yes	23270620	239	5	ERR024964
2483	ERR024976	IU17				Yes	23270620	239	5	ERR024976
2490	ERR024990	DF11				Yes	23270620	239	5	ERR024990
2491	ERR026667	DEU17				Yes	23270620	239	5	ERR026667
2492	ERR026700	HU10				Yes	23270620	239	5	ERR026700
2519	SRR088295	JKD6000	Australia			Yes	22102812	239	5	SRR088295
2520	SRR088296	JKD6001	Australia			Yes	22102812	239	5	SRR088296
2521	SRR088297	JKD6004	Australia			Yes	22102812	239	5	SRR088297
2522	SRR088298	JKD6005	Australia			Yes	22102812	239	5	SRR088298
2523	SRR088299	JKD6021	Australia			Yes	22102812	239	5	SRR088299
2524	SRR088300	JKD6023	Australia			Yes	22102812	239	5	SRR088300
2525	SRR088301	JKD6051	Australia			Yes	22102812	239	5	SRR088301
2526	SRR088302	JKD6052	Australia			Yes	22102812	239	5	SRR088302
2530	SRR404118	118	India		Blood-derived	Genbank		772	15	SRR404118
2539	801492	08-01492	Portugal	2003		Yes	23299977	22	22	ERR017203
2540	0801481_1	08-01481-1	Portugal	2006		Yes	23299977	22	22	ERR017215
2541	800602	08-00602	Germany	2008		Yes	23299977	22	22	ERR017225
2545	801672	08-01672	Germany	2008		Yes	23299977	22	22	ERR017194
2546	703347	07-03347	Czech Republic	2006		Yes	23299977	22	22	ERR017238
2550	ERR024692	IU10				Yes	23270620	239	5	ERR024692
2551	ERR025804	DF28				Yes	23270620	239	5	ERR025804
2552	ERR026653	DEU3				Yes	23270620	239	5	ERR026653
2553	ERR026678	DEU28				Yes	23270620	239	5	ERR026678
2554	ERR026692	DEU43				Yes	23270620	239	5	ERR026692
2567	10C_repeat		UK	2009		Yes	22693998	22	22	ERR101899
2568	11C_repeat		UK	2009		Yes	22693998	22	22	ERR101900
2569	12C_repeat		UK	2009		Yes	22693998	22	22	ERR103394
2570	14C_repeat		UK	2009		Yes	22693998	5	5	ERR103395
2571	15C_repeat		UK	2009		Yes	22693998	22	22	ERR103396
2573	17B_repeat		UK	2009		Yes	22693998	1	15	ERR103398
2574	18B_repeat		UK	2009		Yes	22693998	22	22	ERR103399
2575	19B_repeat		UK	2009		Yes	22693998	22	22	ERR103400
2576	1B_repeat		UK	2009		Yes	22693998	22	22	ERR103401
2577	20B_repeat		UK	2009		Yes	22693998	22	22	ERR103402
2578	6C_repeat		UK	2009		Yes	22693998	22	22	ERR103403
2579	7C_repeat		UK	2009		Yes	22693998	22	22	ERR103404
2580	8C_repeat		UK	2009		Yes	22693998	22	22	ERR103405
2636	MRSA_1B_repeat2		UK	2009		Yes	22693998	22	22	ERR103401
2680	P13	ERR070038	UK	2011		Yes	23158674	2371	22	ERR070038
2681	P23	ERR072247	UK	2011		Yes	23158674	2371	22	ERR072247
2682	ERR085420	SASCBU21	UK	2011		Yes	23158678	22	22	ERR085420
2683	HCW18	ERR128718	UK	2011		Yes	23158674	2371	22	ERR128718
2684	ERR070035	SASCBU11	UK	2011		Yes	23158674	8	5	ERR070035
2685	ERR085416	SASCBU17	UK	2011		Yes	23158678	2371	22	ERR085416
2686	ERR089823	SASCBU24	UK	2011		Yes	23158678	22	22	ERR089823
2687	P26	ERR128707	UK	2011		Yes	23158674	2371	22	ERR128707
2688	ERR131804	SASCBU38	UK	2011		Yes	23158674	772	15	ERR131804
2689	HCW7	ERR131810	UK	2011		Yes	23158674	2371	22	ERR131810
2692	SRR493898	M0060				Genbank		105	5	SRR493898
2700	SRR497524	M1010				Genbank		5	5	SRR497524
2780	SRR088896	MRSA131				Genbank		923	5	SRR088896
2781	SRR088897	MRSA177				Genbank		8	5	SRR088897
2884	C720MRSA		UK	1998		Yes	23299977	22	22	ERR038059
2885	Btn1626		UK	2002		Yes	23299977	22	22	ERR038060
3909	P9	ERR070034	UK	2011		Yes	23158674	2371	22	ERR070034
3910	P10	ERR070036	UK	2011		Yes	23158674	2371	22	ERR070036
3912	P11	ERR070039	UK	2011		Yes	23158674	2371	22	ERR070039
3913	P12	ERR070040	UK	2011		Yes	23158674	2371	22	ERR070040
3914	P2	ERR070042	UK	2011		Yes	23158674	2371	22	ERR070042
3915	P3	ERR070043	UK	2011		Yes	23158674	2371	22	ERR070043
3917	P1	ERR070045	UK	2011		Yes	23158674	2371	22	ERR070045
3918	P5	ERR070046	UK	2011		Yes	23158674	2371	22	ERR070046
3919	P6	ERR070047	UK	2011		Yes	23158674	2371	22	ERR070047
3920	P7	ERR070048	UK	2011		Yes	23158674	2371	22	ERR070048
3921	P14	ERR072246	UK	2011		Yes	23158674	2371	22	ERR072246
3924	P16	ERR124429	UK	2011		Yes	23158674	2371	22	ERR124429
3925	P17	ERR124430	UK	2011		Yes	23158674	2371	22	ERR124430
3926	P20	ERR124431	UK	2011		Yes	23158674	2371	22	ERR124431
3927	P19	ERR124432	UK	2011		Yes	23158674	2371	22	ERR124432
3928	P21	ERR124433	UK	2011		Yes	23158674	2371	22	ERR124433
3929	P22	ERR124434	UK	2011		Yes	23158674	2371	22	ERR124434
3930	P24	ERR124435	UK	2011		Yes	23158674	2371	22	ERR124435
3932	P25	ERR128708	UK	2011		Yes	23158674	2371	22	ERR128708
3933	HCW1	ERR128709	UK	2011		Yes	23158674	2371	22	ERR128709
3934	HCW2	ERR128710	UK	2011		Yes	23158674	2371	22	ERR128710
3935	HCW3	ERR128711	UK	2011		Yes	23158674	2371	22	ERR128711
3936	HCW4	ERR128712	UK	2011		Yes	23158674	2371	22	ERR128712
3937	HCW13	ERR128713	UK	2011		Yes	23158674	2371	22	ERR128713
3938	HCW14	ERR128714	UK	2011		Yes	23158674	2371	22	ERR128714
3939	HCW15	ERR128715	UK	2011		Yes	23158674	2371	22	ERR128715
3940	HCW16	ERR128716	UK	2011		Yes	23158674	2371	22	ERR128716
3941	HCW17	ERR128717	UK	2011		Yes	23158674	2371	22	ERR128717
3943	HCW5	ERR131808	UK	2011		Yes	23158674	2371	22	ERR131808
3944	HCW6	ERR131809	UK	2011		Yes	23158674	2371	22	ERR131809
3946	HCW8	ERR131811	UK	2011		Yes	23158674	2371	22	ERR131811
3947	HCW9	ERR131812	UK	2011		Yes	23158674	2371	22	ERR131812
3948	HCW10	ERR131813	UK	2011		Yes	23158674	2371	22	ERR131813
3949	HCW11	ERR131814	UK	2011		Yes	23158674	2371	22	ERR131814
3950	HCW12	ERR131815	UK	2011		Yes	23158674	2371	22	ERR131815
4094	P8	ERR070033	UK	2011		Yes	23158674	2371	22	ERR070033
4095	HCW19	ERR128719	UK	2011		Yes	23158674	2371	22	ERR128719
4096	HCW20	ERR128720	UK	2011		Yes	23158674	2371	22	ERR128720
4097	ERR070041	SASCBU1	UK	2011		Yes	23158674	1	15	ERR070041
4098	ERR070037	SASCBU13	UK	2011		Yes	23158674	22	22	ERR070037
4099	ERR072248	SASCBU19	UK	2011		Yes	23158674	772	15	ERR072248
4100	ERR124436	SASCBU33	UK			Yes	23158674	772	15	ERR124436
4101	ERR131800	SASCBU34	UK	2011		Yes	23158674	772	15	ERR131800
4102	ERR131801	SASCBU35	UK	2011		Yes	23158674	22	22	ERR131801
4103	ERR131802	SASCBU36	UK	2011		Yes	23158674	22	22	ERR131802
4104	ERR131805	SASCBU39	UK	2011		Yes	23158674	22	22	ERR131805
4105	ERR131806	SASCBU40	UK	2011		Yes	23158674	22	22	ERR131806
4106	ERR131807	SASCBU41	UK	2011		Yes	23158674	22	22	ERR131807
14118	ERR026681	DEU31				Yes	23270620	239	5	ERR026681
14131	ERR017208	08-01483	Portugal	2006		Yes	23299977	22	22	ERR017208
14145	ERR024676	HU18				Yes	23270620	239	5	ERR024676
14160	ERR017239	07-03135	Germany	2007		Yes	23299977	22	22	ERR017239
14166	ERR017217	08-01480	Portugal	2006		Yes	23299977	22	22	ERR017217
14191	ERR017193	08-01673	Germany	2007		Yes	23299977	22	22	ERR017193
14210	ERR017234	07-03341	Czech Republic	2007		Yes	23299977	22	22	ERR017234
14212	ERR017186	09-00981	New Zealand	1996		Yes	23299977	22	22	ERR017186
14214	ERR017233	07-03340	Czech Republic	2006		Yes	23299977	22	22	ERR017233
14218	ERR017174	09-01248	Singapore	2007		Yes	23299977	22	22	ERR017174
14219	ERR017231	07-03168	Germany	2007		Yes	23299977	22	22	ERR017231
14220	ERR017191	08-01674	Germany	2007		Yes	23299977	22	22	ERR017191
14221	ERR024991	DF12				Yes	23270620	239	5	ERR024991
14243	ERR024965	DF37				Yes	23270620	239	5	ERR024965
14252	SRR453054	HAR24	UK	1993	Clinical isolate	Yes	22586109	36	30	SRR453054
14259	SRR453036	1973_07.17	UK	2007	Throat swab	Yes	22586109	36	30	SRR453036
14264	ERR017209	08-01484	Portugal	2006		Yes	23299977	22	22	ERR017209
14270	ERR025797	DF31				Yes	23270620	239	5	ERR025797
14271	ERR017197	08-01666	Germany	2008		Yes	23299977	22	22	ERR017197
14274	SRR453047	DEN4415	Denmark	2001	Clinical isolate	Yes	22586109	36	30	SRR453047
14289	ERR017236	07-03345	Czech Republic	2005		Yes	23299977	22	22	ERR017236
14319	ERR017242	07-02996	Australia	2006		Yes	23299977	22	22	ERR017242
14323	ERR017260	07-02389	Germany	2007		Yes	23299977	22	22	ERR017260
14325	ERR017263	07-01492	Germany	2007		Yes	23299977	22	22	ERR017263
14331	ERR017175	09-01249	Singapore	2007		Yes	23299977	22	22	ERR017175
14336	SRR453045	2483_97.75	UK	1997	Graft	Yes	22586109	36	30	SRR453045
14337	ERR017200	08-01669	Germany	2008		Yes	23299977	22	22	ERR017200
14338	SRR453046	5806_98.83	UK	1998	Wound swab	Yes	22586109	36	30	SRR453046
14343	ERR017207	08-01482	Portugal	2006		Yes	23299977	22	22	ERR017207
14350	ERR017241	07-02997	Australia	2006		Yes	23299977	22	22	ERR017241
14355	ERR017244	07-02989	Australia	2006		Yes	23299977	22	22	ERR017244
14358	ERR017211	08-01486	Portugal	2006		Yes	23299977	22	22	ERR017211
14359	ERR017177	96-01678_H	Germany	1996		Yes	23299977	22	22	ERR017177
14361	ERR024959	DF41				Yes	23270620	239	5	ERR024959
14369	ERR017230	07-03348-1	Denmark	2004		Yes	23299977	22	22	ERR017230
14371	ERR017190	09-00985	Australia	1996		Yes	23299977	22	22	ERR017190
14375	ERR017243	07-02988	Australia	2006		Yes	23299977	22	22	ERR017243
14376	ERR017169	98-26821	UK	1998		Yes	23299977	22	22	ERR017169
14377	ERR017196	08-01530	Germany	2008		Yes	23299977	22	22	ERR017196
14380	ERR017210	08-01485	Portugal	2006		Yes	23299977	22	22	ERR017210
14386	ERR017245	07-02990	Australia	2006		Yes	23299977	22	22	ERR017245
14395	ERR017232	07-03339	Czech Republic	2006		Yes	23299977	22	22	ERR017232
14407	ERR017205	08-01491	Portugal	1997		Yes	23299977	22	22	ERR017205
14415	ERR024968	DF40				Yes	23270620	239	5	ERR024968
14417	ERR025799	DF21				Yes	23270620	239	5	ERR025799
14420	SRR453039	2589_07.17	UK	2007	Blood	Yes	22586109	36	30	SRR453039
14423	SRR453042	6636_07.67	UK	2007	ET aspirate	Yes	22586109	36	30	SRR453042
14437	SRR453034	1696_07.08	UK	2007	Nasal swab	Yes	22586109	36	30	SRR453034
14444	ERR017229	07-03349	Denmark	2005		Yes	23299977	22	22	ERR017229
14454	ERR017254	07-02901	Germany	2007		Yes	23299977	22	22	ERR017254
14463	ERR017223	07-03356	Denmark	2007		Yes	23299977	22	22	ERR017223
14468	ERR017213	08-01488	Portugal	2006		Yes	23299977	22	22	ERR017213
14472	ERR017178	98-10618	UK	1998		Yes	23299977	22	22	ERR017178
14480	ERR024970	IU14				Yes	23270620	239	5	ERR024970
14481	ERR017189	09-00984	New Zealand	1996		Yes	23299977	22	22	ERR017189
14483	ERR017250	07-02995	Australia	2006		Yes	23299977	22	22	ERR017250
14504	ERR024980	DF1				Yes	23270620	239	5	ERR024980
14508	ERR103394	MRSA_12C	UK	2009		Yes	22693998	22	22	ERR103394
14509	SRR453044	7206_07.75	UK	2007	Blood	Yes	22586109	36	30	SRR453044
14516	ERR023910	T183N8				Yes	23270620	239	5	ERR023910
14517	SRR453031	1791_03.08	UK	2003	Blood	Yes	22586109	36	30	SRR453031
14521	ERR017221	07-03353	Denmark	2006		Yes	23299977	22	22	ERR017221
14522	ERR017287	06-01900	Germany	2006		Yes	23299977	22	22	ERR017287
14524	ERR017201	08-01670	Germany	2008		Yes	23299977	22	22	ERR017201
14525	ERR101900	MRSA_11C	UK	2009		Yes	22693998	22	22	ERR101900
14526	ERR017214	08-01489	Hungary	2003		Yes	23299977	22	22	ERR017214
14530	ERR017206	08-01490	Portugal	1997		Yes	23299977	22	22	ERR017206
14531	SRR453041	3841_07.33	UK	2007	Nose	Yes	22586109	36	30	SRR453041
14532	SRR453037	2449_07.17	UK	2007	Blood	Yes	22586109	36	30	SRR453037
14535	ERR017202	08-01671	Germany	2008		Yes	23299977	22	22	ERR017202
14551	ERR024973	DF5				Yes	23270620	239	5	ERR024973
14553	ERR024971	DF3				Yes	23270620	239	5	ERR024971
14578	ERR024981	DF2				Yes	23270620	239	5	ERR024981
14584	ERR017226	08-01304	Germany	2008		Yes	23299977	22	22	ERR017226
14593	SRR453040	2880_07.25	UK	2007	Sputum	Yes	22586109	36	30	SRR453040
14606	ERR017185	09-00980	UK	1996		Yes	23299977	22	22	ERR017185
14612	ERR017171	09-01245	Singapore	2007		Yes	23299977	22	22	ERR017171
14635	ERR024987	DF7				Yes	23270620	239	5	ERR024987
14645	ERR017179	09-01244	Singapore	2007		Yes	23299977	22	22	ERR017179
14648	ERR017198	08-01667	Germany	2008		Yes	23299977	22	22	ERR017198
14649	ERR017267	07-00058	Germany	2006		Yes	23299977	22	22	ERR017267
14650	ERR017172	09-01246	Singapore	2007		Yes	23299977	22	22	ERR017172
14651	ERR025803	DF27				Yes	23270620	239	5	ERR025803
14672	SRR453075	3366_99	Ireland	1999	Clinical isolate	Yes	22586109	36	30	SRR453075
14676	ERR026704	HU2				Yes	23270620	239	5	ERR026704
14678	ERR024986	DF18				Yes	23270620	239	5	ERR024986
14681	ERR017199	08-01668	Germany	2008		Yes	23299977	22	22	ERR017199
14682	ERR017261	07-02477	Germany	2007		Yes	23299977	22	22	ERR017261
14689	ERR026686	DEU40				Yes	23270620	239	5	ERR026686
14690	ERR024983	DF6				Yes	23270620	239	5	ERR024983
14691	ERR024993	DF14				Yes	23270620	239	5	ERR024993
14693	ERR024961	DF33				Yes	23270620	239	5	ERR024961
14711	SRR453035	1712_07.08	UK	2007	Broncho-alveolar	Yes	22586109	36	30	SRR453035
14712	SRR453043	6659_07.67	UK	2007	Nasal swab	Yes	22586109	36	30	SRR453043
14713	ERR017301	09-00678	Namibia	2009		Yes	23299977	22	22	ERR017301
14716	ERR025798	DF20				Yes	23270620	239	5	ERR025798
14720	SRR453032	9570_06.92	UK	2006	Sputum	Yes	22586109	36	30	SRR453032
14721	ERR017255	07-01497	Germany	2007		Yes	23299977	22	22	ERR017255
14722	ERR017237	07-03346	Czech Republic	2005		Yes	23299977	22	22	ERR017237
14726	ERR017280	06-01203	Germany	2006		Yes	23299977	22	22	ERR017280
14734	ERR026670	DEU21				Yes	23270620	239	5	ERR026670
14744	SRR453033	1227_07.08	UK	2007	Blood	Yes	22586109	36	30	SRR453033
14745	ERR025796	DF30				Yes	23270620	239	5	ERR025796
14761	ERR024972	DF4				Yes	23270620	239	5	ERR024972
14762	ERR024958	DF32				Yes	23270620	239	5	ERR024958
14763	ERR017283	06-01552	Germany	2006		Yes	23299977	22	22	ERR017283
14764	ERR017219	07-03351	Denmark	2005		Yes	23299977	22	22	ERR017219
14766	ERR017247	07-02992	Australia	2006		Yes	23299977	22	22	ERR017247
14771	ERR017222	07-03354-2	Denmark	2006		Yes	23299977	22	22	ERR017222
14781	ERR017286	06-01686	Germany	2006		Yes	23299977	22	22	ERR017286
14790	ERR017291	09-00683	Namibia	2009		Yes	23299977	22	22	ERR017291
14793	SRR453038	2496_07.17	UK	2007	Wound swab	Yes	22586109	36	30	SRR453038
14794	SRR453076	7G_02	USA	2002	Clinical isolate	Yes	22586109	500	30	SRR453076
14796	ERR024994	DF15				Yes	23270620	239	5	ERR024994
14802	ERR103404	MRSA_7C	UK	2009		Yes	22693998	22	22	ERR103404
14807	ERR103403	MRSA_6C	UK	2009		Yes	22693998	22	22	ERR103403
14810	ERR026699	MU19				Yes	23270620	239	5	ERR026699
14818	ERR017266	07-00655	Germany	2007		Yes	23299977	22	22	ERR017266
14821	ERR017227	07-03350	Denmark	2005		Yes	23299977	22	22	ERR017227
14827	ERR103405	MRSA_8C	UK	2009		Yes	22693998	22	22	ERR103405
14830	ERR024988	DF8				Yes	23270620	239	5	ERR024988
14833	ERR025795	DF19				Yes	23270620	239	5	ERR025795
14837	ERR017262	07-02789	Germany	2007		Yes	23299977	22	22	ERR017262
14842	SRR453074	HU275	Hungary	2002	Blood/CSF	Yes	22586109	36	30	SRR453074
14848	ERR103402	MRSA_20B	UK	2009		Yes	22693998	22	22	ERR103402
14857	ERR026702	HU12				Yes	23270620	239	5	ERR026702
14864	ERR038169	RH0600006409_2	UK	2005		Yes	23299977	22	22	ERR038169
14888	ERR026689	MU2				Yes	23270620	239	5	ERR026689
14891	ERR024686	IU3				Yes	23270620	239	5	ERR024686
14894	ERR017275	06-02751	Germany	2006		Yes	23299977	22	22	ERR017275
14909	ERR025805	DF29				Yes	23270620	239	5	ERR025805
14920	ERR017274	07-00309	Germany	2007		Yes	23299977	22	22	ERR017274
14927	ERR026014	MU12				Yes	23270620	239	5	ERR026014
14928	ERR017258	07-02088	Germany	2007		Yes	23299977	22	22	ERR017258
14937	ERR017299	04-02315-1	UK	2004		Yes	23299977	22	22	ERR017299
14954	ERR017298	04-02314-1	UK	2004		Yes	23299977	22	22	ERR017298
14955	ERR026657	DEU7				Yes	23270620	239	5	ERR026657
14958	ERR017256	07-01744	Nigeria	2002		Yes	23299977	22	22	ERR017256
14959	ERR017282	06-01396	Germany	2006		Yes	23299977	22	22	ERR017282
14965	ERR017269	07-00060	Germany	2006		Yes	23299977	22	22	ERR017269
14966	ERR017265	07-01319	Germany	2007		Yes	23299977	22	22	ERR017265
14968	ERR017273	07-00064	Germany	2006		Yes	23299977	22	22	ERR017273
14974	ERR017270	07-00061	Germany	2006		Yes	23299977	22	22	ERR017270
14982	ERR101899	MRSA_10C	UK	2009		Yes	22693998	22	22	ERR101899
14984	ERR017284	06-01583	Germany	2006		Yes	23299977	22	22	ERR017284
14985	ERR017277	06-02459	Germany	2006		Yes	23299977	22	22	ERR017277
15007	ERR026665	DEU15	Turkey			Yes	23270620	239	5	ERR026665
15008	ERR024677	HU19				Yes	23270620	239	5	ERR024677
15009	ERR024685	IU2	Turkey			Yes	23270620	239	5	ERR024685
15010	ERR024974	IU15	Turkey			Yes	23270620	239	5	ERR024974
15011	ERR017257	07-01932	Sudan	2007		Yes	23299977	22	22	ERR017257
15012	ERR026690	DEU41	Turkey			Yes	23270620	239	5	ERR026690
15015	ERR026661	DEU13				Yes	23270620	239	5	ERR026661
15020	ERR017253	07-02986	Australia	2006		Yes	23299977	22	22	ERR017253
15023	ERR038172	RH0600006109_2	UK	2005		Yes	23299977	22	22	ERR038172
15045	ERR017288	05-01089	Germany	2002		Yes	23299977	22	22	ERR017288
15050	ERR026683	DEU35	Turkey			Yes	23270620	239	5	ERR026683
15051	ERR026674	DEU37	Turkey			Yes	23270620	239	5	ERR026674
15053	ERR026675	DEU38	Turkey			Yes	23270620	239	5	ERR026675
15058	ERR026671	DEU22				Yes	23270620	239	5	ERR026671
15067	ERR024674	HU16	Turkey			Yes	23270620	239	5	ERR024674
15074	ERR024967	DF39				Yes	23270620	239	5	ERR024967
15090	ERR026684	DEU36	Turkey			Yes	23270620	239	5	ERR026684
15102	ERR026664	DEU14	Turkey			Yes	23270620	239	5	ERR026664
15115	ERR103398	MRSA_17B	UK	2009		Yes	22693998	1	15	ERR103398
15116	ERR026695	DEU47	Turkey			Yes	23270620	239	5	ERR026695
15117	ERR026703	MU20	Turkey			Yes	23270620	239	5	ERR026703
15118	ERR026648	DEU1				Yes	23270620	239	5	ERR026648
15119	ERR026652	DEU2	Turkey			Yes	23270620	239	5	ERR026652
15120	ERR026687	DEU50	Turkey			Yes	23270620	239	5	ERR026687
15121	ERR024975	IU16				Yes	23270620	239	5	ERR024975
15122	ERR026659	DEU9				Yes	23270620	239	5	ERR026659
15134	ERR026662	DEU23	Turkey			Yes	23270620	239	5	ERR026662
15142	ERR024688	IU6	Turkey			Yes	23270620	239	5	ERR024688
15147	ERR045063	10000152	UK	1997		Yes	23299977	22	22	ERR045063
15150	ERR026688	MU1	Turkey			Yes	23270620	239	5	ERR026688
15151	ERR024683	IU12	Turkey			Yes	23270620	239	5	ERR024683
15152	ERR026007	MU4	Turkey			Yes	23270620	239	5	ERR026007
15153	ERR026012	MU10	Turkey			Yes	23270620	239	5	ERR026012
15162	ERR024690	IU8				Yes	23270620	239	5	ERR024690
15166	ERR024679	HU23	Turkey			Yes	23270620	239	5	ERR024679
15169	ERR045069	10000169	UK	2007		Yes	23299977	22	22	ERR045069
15175	ERR024962	DF34				Yes	23270620	239	5	ERR024962
15176	ERR024966	DF38				Yes	23270620	239	5	ERR024966
15180	ERR026677	DEU27	Turkey			Yes	23270620	239	5	ERR026677
15181	ERR026706	HU5	Turkey			Yes	23270620	239	5	ERR026706
15182	ERR026649	DEU10	Turkey			Yes	23270620	239	5	ERR026649
15183	ERR026680	DEU30	Turkey			Yes	23270620	239	5	ERR026680
15189	ERR024989	DF9				Yes	23270620	239	5	ERR024989
15191	ERR038171	HO5322054809_2	UK	2005		Yes	23299977	22	22	ERR038171
15207	ERR026701	HU11	Turkey			Yes	23270620	239	5	ERR026701
15208	ERR024992	DF13				Yes	23270620	239	5	ERR024992
15211	ERR026650	DEU11	Turkey			Yes	23270620	239	5	ERR026650
15212	ERR026679	DEU29	Turkey			Yes	23270620	239	5	ERR026679
15222	ERR024985	DF17				Yes	23270620	239	5	ERR024985
15245	ERR024670	HU25	Brazil			Yes	23270620	239	5	ERR024670
15250	ERR017271	07-00062	Germany	2006		Yes	23299977	22	22	ERR017271
15254	ERR024960	DF42				Yes	23270620	239	5	ERR024960
15257	ERR045068	10000168	UK	2007		Yes	23299977	22	22	ERR045068
15265	ERR024984	DF16				Yes	23270620	239	5	ERR024984
15280	ERR044579	10000213	UK	2008		Yes	23299977	22	22	ERR044579
15281	ERR045057	10000146	UK	1998		Yes	23299977	22	22	ERR045057
15305	ERR026705	HU4	Turkey			Yes	23270620	239	5	ERR026705
15318	ERR044577	10000211	UK	2007		Yes	23299977	22	22	ERR044577
15335	ERR017281	06-01347	Germany	2006		Yes	23299977	22	22	ERR017281
15339	ERR026655	DEU5	Turkey			Yes	23270620	239	5	ERR026655
15345	ERR026666	DEU16	Turkey			Yes	23270620	239	5	ERR026666
15346	ERR026009	MU6	Turkey			Yes	23270620	239	5	ERR026009
15356	ERR044574	10000208	UK	2007		Yes	23299977	22	22	ERR044574
15413	ERR044569	10000193	UK	2007		Yes	23299977	22	22	ERR044569
15415	ERR103396	MRSA_15C	UK	2009		Yes	22693998	22	22	ERR103396
15433	ERR017249	07-02994	Australia	2006		Yes	23299977	22	22	ERR017249
15439	ERR045070	10000170	UK	2007		Yes	23299977	22	22	ERR045070
15440	ERR045066	10000166	UK	2007		Yes	23299977	22	22	ERR045066
15448	ERR025800	DF23				Yes	23270620	239	5	ERR025800
15456	ERR045071	10000171	UK	2007		Yes	23299977	22	22	ERR045071
15503	ERR024963	DF35				Yes	23270620	239	5	ERR024963
15547	ERR026693	DEU44				Yes	23270620	239	5	ERR026693
15590	ERR044565	10000189	UK	2007		Yes	23299977	22	22	ERR044565
15601	ERR103401	MRSA_1B	UK	2009		Yes	22693998	22	22	ERR103401
15610	ERR044563	10000187	UK	2008		Yes	23299977	22	22	ERR044563
15626	ERR045061	10000150	UK	1998		Yes	23299977	22	22	ERR045061
15636	ERR044572	10000206	UK	2007		Yes	23299977	22	22	ERR044572
15638	ERR045065	10000155	Sweden	1997		Yes	23299977	22	22	ERR045065
15661	ERR026654	DEU4				Yes	23270620	239	5	ERR026654
15713	ERR026013	MU11				Yes	23270620	239	5	ERR026013
15721	ERR044575	10000209	UK	2007		Yes	23299977	22	22	ERR044575
15739	ERR045073	10000173	UK	2006		Yes	23299977	22	22	ERR045073
15785	ERR045059	10000148	Ireland	1993		Yes	23299977	22	22	ERR045059
15799	ERR026010	MU7	Turkey			Yes	23270620	239	5	ERR026010
15854	ERR044560	10000174	UK	2007		Yes	23299977	22	22	ERR044560
15880	ERR044566	10000190	UK	2007		Yes	23299977	22	22	ERR044566
15898	ERR044578	10000212	UK	2007		Yes	23299977	22	22	ERR044578
15906	ERR103400	MRSA_19B	UK	2009		Yes	22693998	22	22	ERR103400
15926	ERR044576	10000210	UK	2002		Yes	23299977	22	22	ERR044576
15928	ERR045060	10000149	UK	2002		Yes	23299977	22	22	ERR045060
15930	ERR045067	10000167	UK	2007		Yes	23299977	22	22	ERR045067
15931	ERR044564	10000188	UK	2008		Yes	23299977	22	22	ERR044564
15932	ERR045062	10000151	UK	1997		Yes	23299977	22	22	ERR045062
15933	ERR044561	10000175	UK	2007		Yes	23299977	22	22	ERR044561
16011	ERR044562	10000186	UK	2008		Yes	23299977	22	22	ERR044562
16012	ERR044573	10000207	UK	2007		Yes	23299977	22	22	ERR044573
16013	ERR045072	10000172	UK	2005		Yes	23299977	22	22	ERR045072
16029	ERR044581	10000215	UK	2007		Yes	23299977	22	22	ERR044581
16030	ERR044580	10000214	UK	2002		Yes	23299977	22	22	ERR044580
16031	ERR044567	10000191	UK	2007		Yes	23299977	22	22	ERR044567
16033	ERR044568	10000192	UK	2007		Yes	23299977	22	22	ERR044568
16096	ERR045064	10000153	Netherlands	1999		Yes	23299977	22	22	ERR045064
16106	ERR044571	10000195	UK	2007		Yes	23299977	22	22	ERR044571
16112	ERR103395	MRSA_14C	UK	2009		Yes	22693998	5	5	ERR103395
16118	ERR025801	DF25				Yes	23270620	239	5	ERR025801
16163	ERR044570	10000194	UK	2007		Yes	23299977	22	22	ERR044570
16169	ERR026673	DEU26				Yes	23270620	239	5	ERR026673
16281	ERR045056	10000141	UK	2006		Yes	23299977	22	22	ERR045056
16352	ERR045058	10000147	Australia	1999		Yes	23299977	22	22	ERR045058
16355	ERR044589	11000217	UK	1991		Yes	23299977	22	22	ERR044589
16642	ERR026696	DEU48				Yes	23270620	239	5	ERR026696

## Sheet: H_pylori
Datasets S1 (H. pylori): Genomes included in the study dataset, with available metadata and genome sequence accession numbers.
BIGS ID	Strain	Alias	Country	Year	Source	Published	PubMed ID	Accession number
49	G27		Italy		human	Yes	18952803	CP001173
50	Shi470		Peru	2006	human	Yes	21124785	CP001072
51	HPAG1		Sweden	1995-1997	human	Yes	16788065	CP000241
52	P12		Germany		human	Yes	20478826	CP001217
53	J99		USA	1994	human	Yes	9923682	AE001439
1524	98-10		Japan		human	Yes	19123947	PRJNA55307
1525	B128		USA		human	Yes	19123947	PRJNA55309
1526	B38		France			Yes	20537153	PRJNA59415
1527	HPKX_438_AG0C1		Sweden			Yes	18332421
1528	HPKX_438_CA4C1		Sweden			Yes	18332421
1784	51		South Korea			Genbank		CP000012
9264	SRR401915	Hp P-16	USA			Genbank		SRR401915
9265	SRR400671	CPY1124	Japan			Genbank		SRR400671
9266	SRR572213	MALT	Canada			Genbank		SRR572213
9267	SRR400847	CPY1962	Japan			Genbank		SRR400847
9269	SRR499911	R046Wa	Canada			Genbank		SRR499911
9270	SRR400842	CPY1313	Japan			Genbank		SRR400842
9273	SRR499918	R32b	Canada			Genbank		SRR499918
9274	SRR401994	Hp H-28	USA			Genbank		SRR401994
9278	SRR499902	R030b	Canada			Genbank		SRR499902
9279	SRR400895	NQ4110	Colombia			Genbank		SRR400895
9282	SRR572217	CPY6291				Genbank		SRR572217
9283	SRR572218	CPY1662	Japan			Genbank		SRR572218
9284	SRR401881	Hp H-10	USA			Genbank		SRR401881
9285	SRR400850	CPY3281	Japan			Genbank		SRR400850
9286	SRR401876	Hp A-14	USA			Genbank		SRR401876
9288	SRR400854	CPY6081	Japan			Genbank		SRR400854
9289	SRR400860	CPY6271	Japan			Genbank		SRR400860
9290	SRR499908	R038b	Canada			Genbank		SRR499908
9291	SRR401950	Hp H-43	USA			Genbank		SRR401950
9292	SRR499907	R037c	Canada			Genbank		SRR499907
9293	SRR401992	Hp H-27	USA			Genbank		SRR401992
9294	SRR400858	CPY6261	Japan			Genbank		SRR400858
9295	SRR401975	Hp H-34	USA			Genbank		SRR401975
9296	SRR400863	CPY6311	Japan			Genbank		SRR400863
9297	SRR401941	Hp P-8	USA			Genbank		SRR401941
9298	SRR401895	Hp A-26	USA			Genbank		SRR401895
9299	SRR401938	Hp H-30	USA			Genbank		SRR401938
9300	SRR401871	Hp H-19	USA			Genbank		SRR401871
9301	SRR401874	Hp H-21	USA			Genbank		SRR401874
9303	SRR401940	Hp P-74	USA			Genbank		SRR401940
9304	SRR401962	Hp P-8b	USA			Genbank		SRR401962
9306	SRR499914	R055a	Canada			Genbank		SRR499914
9309	SRR401880	Hp A-8	USA			Genbank		SRR401880
9310	SRR401982	Hp P-28b	USA			Genbank		SRR401982
9311	SRR499916	R056a	Canada			Genbank		SRR499916
9312	SRR499900	R018c	Canada			Genbank		SRR499900
9313	SRR401901	Hp A-5	USA			Genbank		SRR401901
9314	SRR400897	NQ4161	Colombia			Genbank		SRR400897
9315	SRR401972	Hp H-45	USA			Genbank		SRR401972
9316	SRR400891	NQ4076	Colombia			Genbank		SRR400891
9318	SRR401877	Hp A-17	USA			Genbank		SRR401877
9320	SRR401956	Hp P-23	USA			Genbank		SRR401956
9321	SRR572210	CCHI33	Canada			Genbank		SRR572210
9322	SRR401885	Hp A-16	USA			Genbank		SRR401885
9324	SRR401987	Hp H-9	USA			Genbank		SRR401987
9325	SRR499904	R036d	Canada			Genbank		SRR499904
9326	SRR401996	Hp P-62	USA			Genbank		SRR401996
9328	SRR401905	Hp P-30	USA			Genbank		SRR401905
9330	SRR400889	NQ4053	Colombia			Genbank		SRR400889
9331	SRR401894	Hp H-23	USA			Genbank		SRR401894
9333	SRR401977	Hp H-41	USA			Genbank		SRR401977
9335	SRR401866	Hp H-11	USA			Genbank		SRR401866
9337	SRR400903	NQ4228	Colombia			Genbank		SRR400903
9338	SRR401913	Hp P-15	USA			Genbank		SRR401913
9339	SRR401967	Hp H-4	USA			Genbank		SRR401967
9340	SRR401897	Hp A-27	USA			Genbank		SRR401897
9342	SRR401890	Hp A-6	USA			Genbank		SRR401890
9343	SRR401973	Hp H-24	USA			Genbank		SRR401973
9344	SRR400899	NQ4200	Colombia			Genbank		SRR400899
9345	SRR400893	NQ4099	Colombia			Genbank		SRR400893
9346	SRR401969	Hp P-3b	USA			Genbank		SRR401969
9347	SRR401924	Hp P-3	USA			Genbank		SRR401924
9348	SRR401883	Hp H-24b	USA			Genbank		SRR401883
9349	SRR401900	Hp A-4	USA			Genbank		SRR401900
9350	SRR401919	Hp H-24c	USA			Genbank		SRR401919
9354	SRR401912	Hp P-15b	USA			Genbank		SRR401912
9358	SRR400900	NQ4216	Colombia			Genbank		SRR400900
9362	SRR401930	Hp P-11	USA			Genbank		SRR401930
9363	SRR401953	Hp P-11b	USA			Genbank		SRR401953
9364	SRR401908	Hp H-44	USA			Genbank		SRR401908
9366	SRR401922	Hp P-25	USA			Genbank		SRR401922
9367	SRR401863	Hp A-11				Genbank		SRR401863
9368	SRR401959	Hp H-29	USA			Genbank		SRR401959
9369	SRR401948	Hp P-4d	USA			Genbank		SRR401948
9370	SRR401958	Hp P-25d	USA			Genbank		SRR401958
9371	SRR401998	Hp H-36	USA			Genbank		SRR401998
9372	SRR401984	Hp P-4c	USA			Genbank		SRR401984
9373	SRR401933	Hp P-1	USA			Genbank		SRR401933
9374	SRR401951	Hp H-6	USA			Genbank		SRR401951
9375	SRR401177	Hp P-4	USA			Genbank		SRR401177
9376	SRR401943	Hp P-26	USA			Genbank		SRR401943
9377	SRR401917	Hp P-1b	USA			Genbank		SRR401917
9378	SRR401870	Hp H-18	USA			Genbank		SRR401870
9379	SRR401946	Hp P-41	USA			Genbank		SRR401946
9380	SRR401887	Hp A-20	USA			Genbank		SRR401887
9381	SRR401985	Hp H-3	USA			Genbank		SRR401985
9382	SRR401868	Hp H-16	USA			Genbank		SRR401868
9383	SRR401909	Hp H-5b	USA			Genbank		SRR401909
9384	SRR400887	NQ4044	Colombia			Genbank		SRR400887
9385	SRR572215	Hp H-1	USA			Genbank		SRR572215
9386	SRR401964	Hp P-13b	USA			Genbank		SRR401964
9387	SRR401965	Hp P-2	USA			Genbank		SRR401965
9388	SRR401931	Hp P-13	USA			Genbank		SRR401931
9389	SRR401925	Hp P-2	USA			Genbank		SRR401925
9391	SRR401903	Hp P-2b	USA			Genbank		SRR401903
9392	SRR401891	Hp A-9	USA			Genbank		SRR401891
